# Supplementary material for: Analysis of Antimicrobial Resistance in Bacterial Pathogens Recovered from Food and Human Sources: Insights from 639,087 Bacterial Whole-Genome Sequences in the NCBI Pathogen Detection Database
Source: MDPI journal article supplement (doi:10.3390/microorganisms12040709), 2024-03-30

## Supplementary File S6

The following pages contain supplementary figures for statistical analysis (pairwise Fisher's exact test for proportions) comparing proportion of isolates encoding resistance to antimicrobial class (green bars) versus proportion encoding resistance to both antimicrobial class and biocides (dark red bars) for each genus (top left page title). Data is grouped by isolation source (x-axis) and antimicrobial class (top-panel headings). Significance between Antimicrobial and Antimicrobial & Biocide is displayed above grouped bars: ns = not significant;  $p < 0.05 = *$ ;  $p < 0.01 = **$ ;  $p < 0.001 = ***$ ;  $p < 0.0001 = ****$ . The total number of isolates (n) from each source (x-axis) is listed above grouped bars in parentheses.

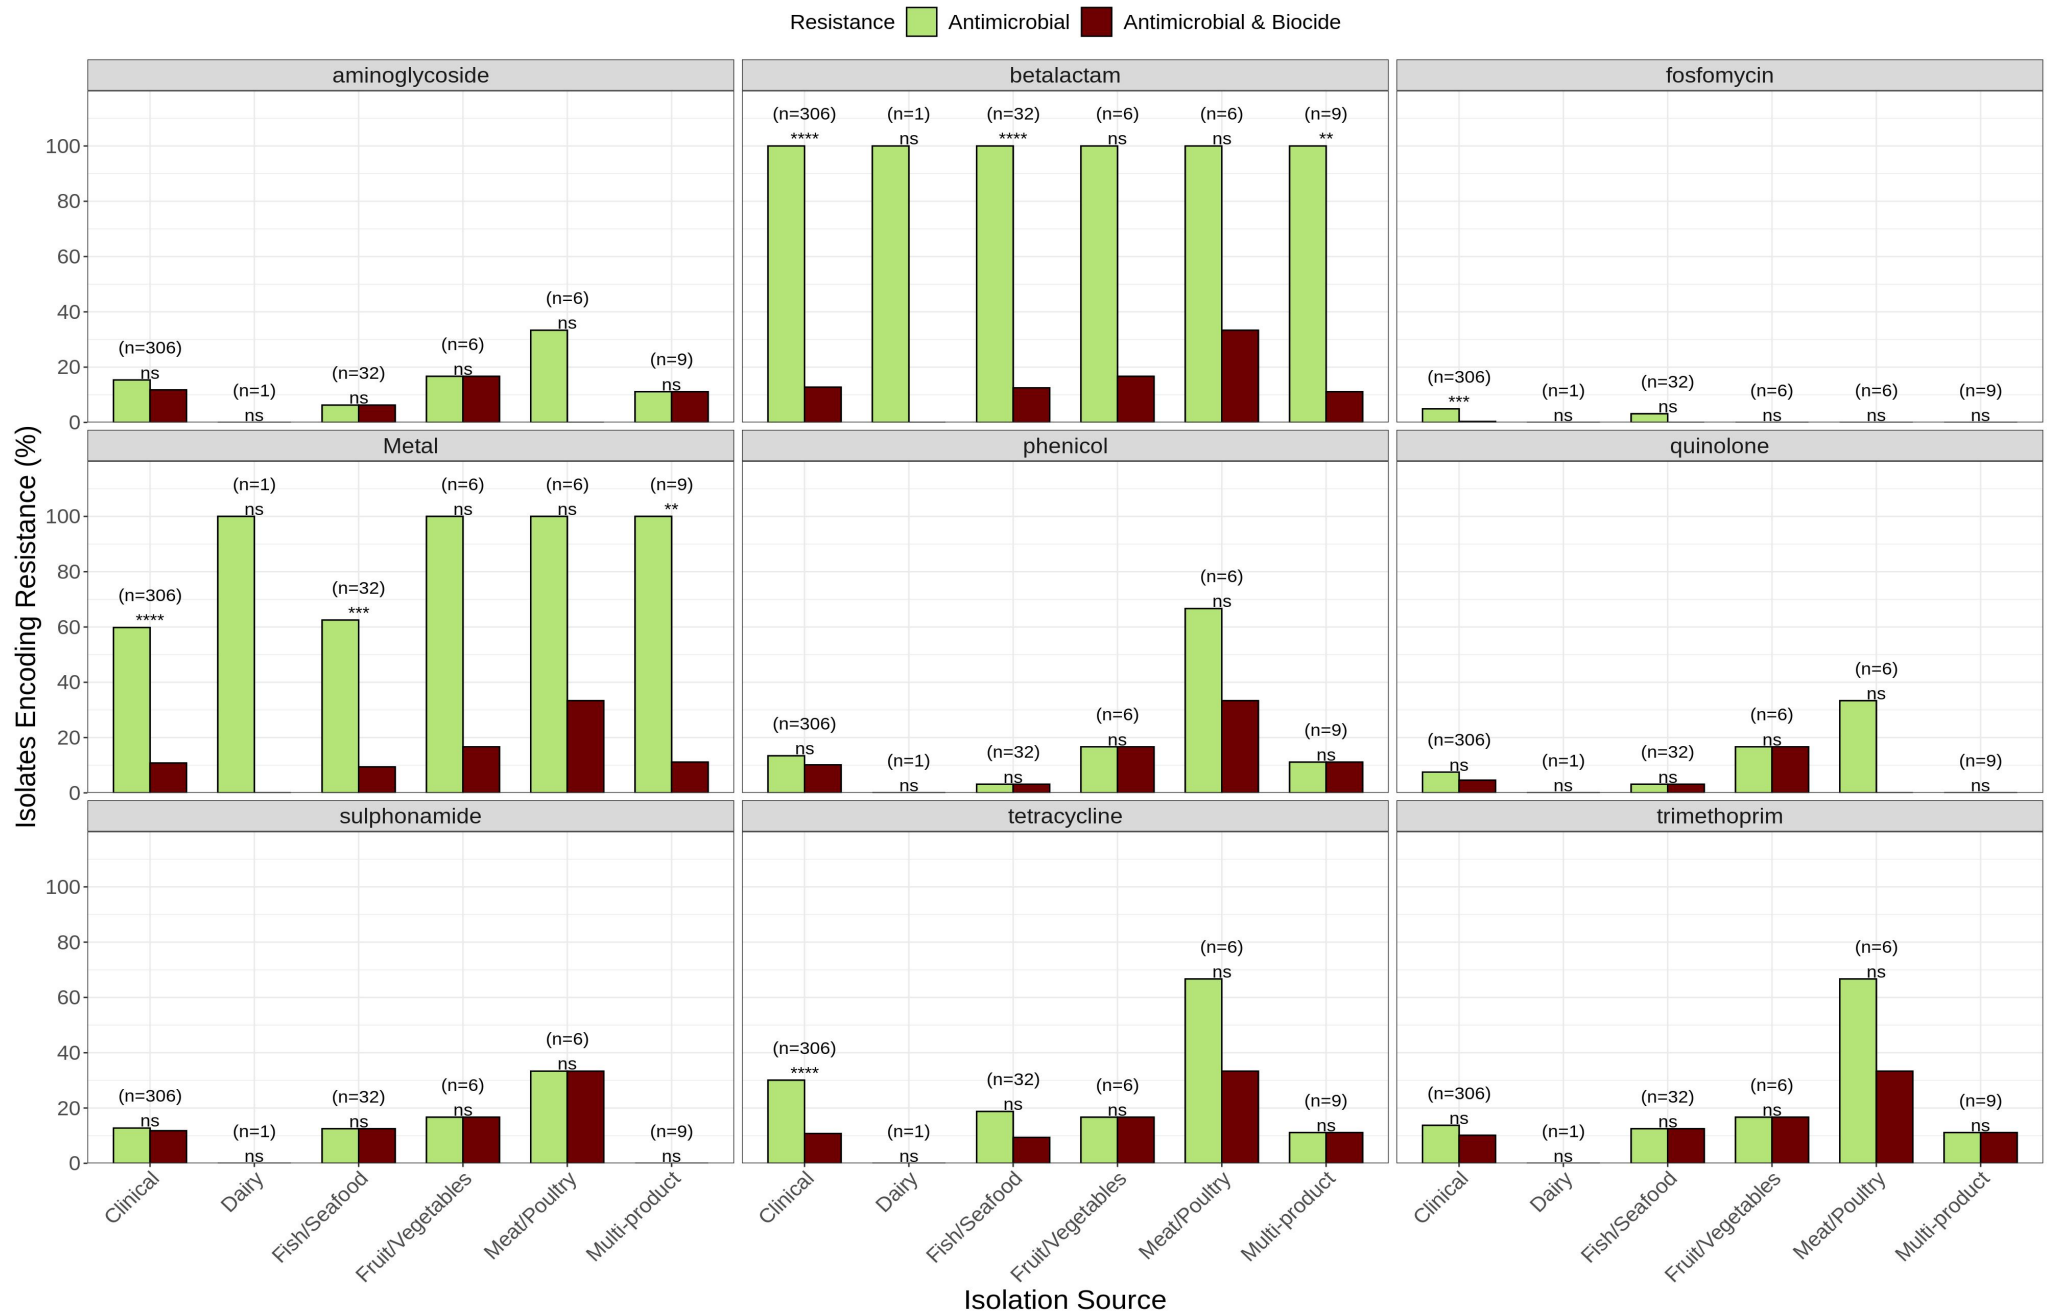

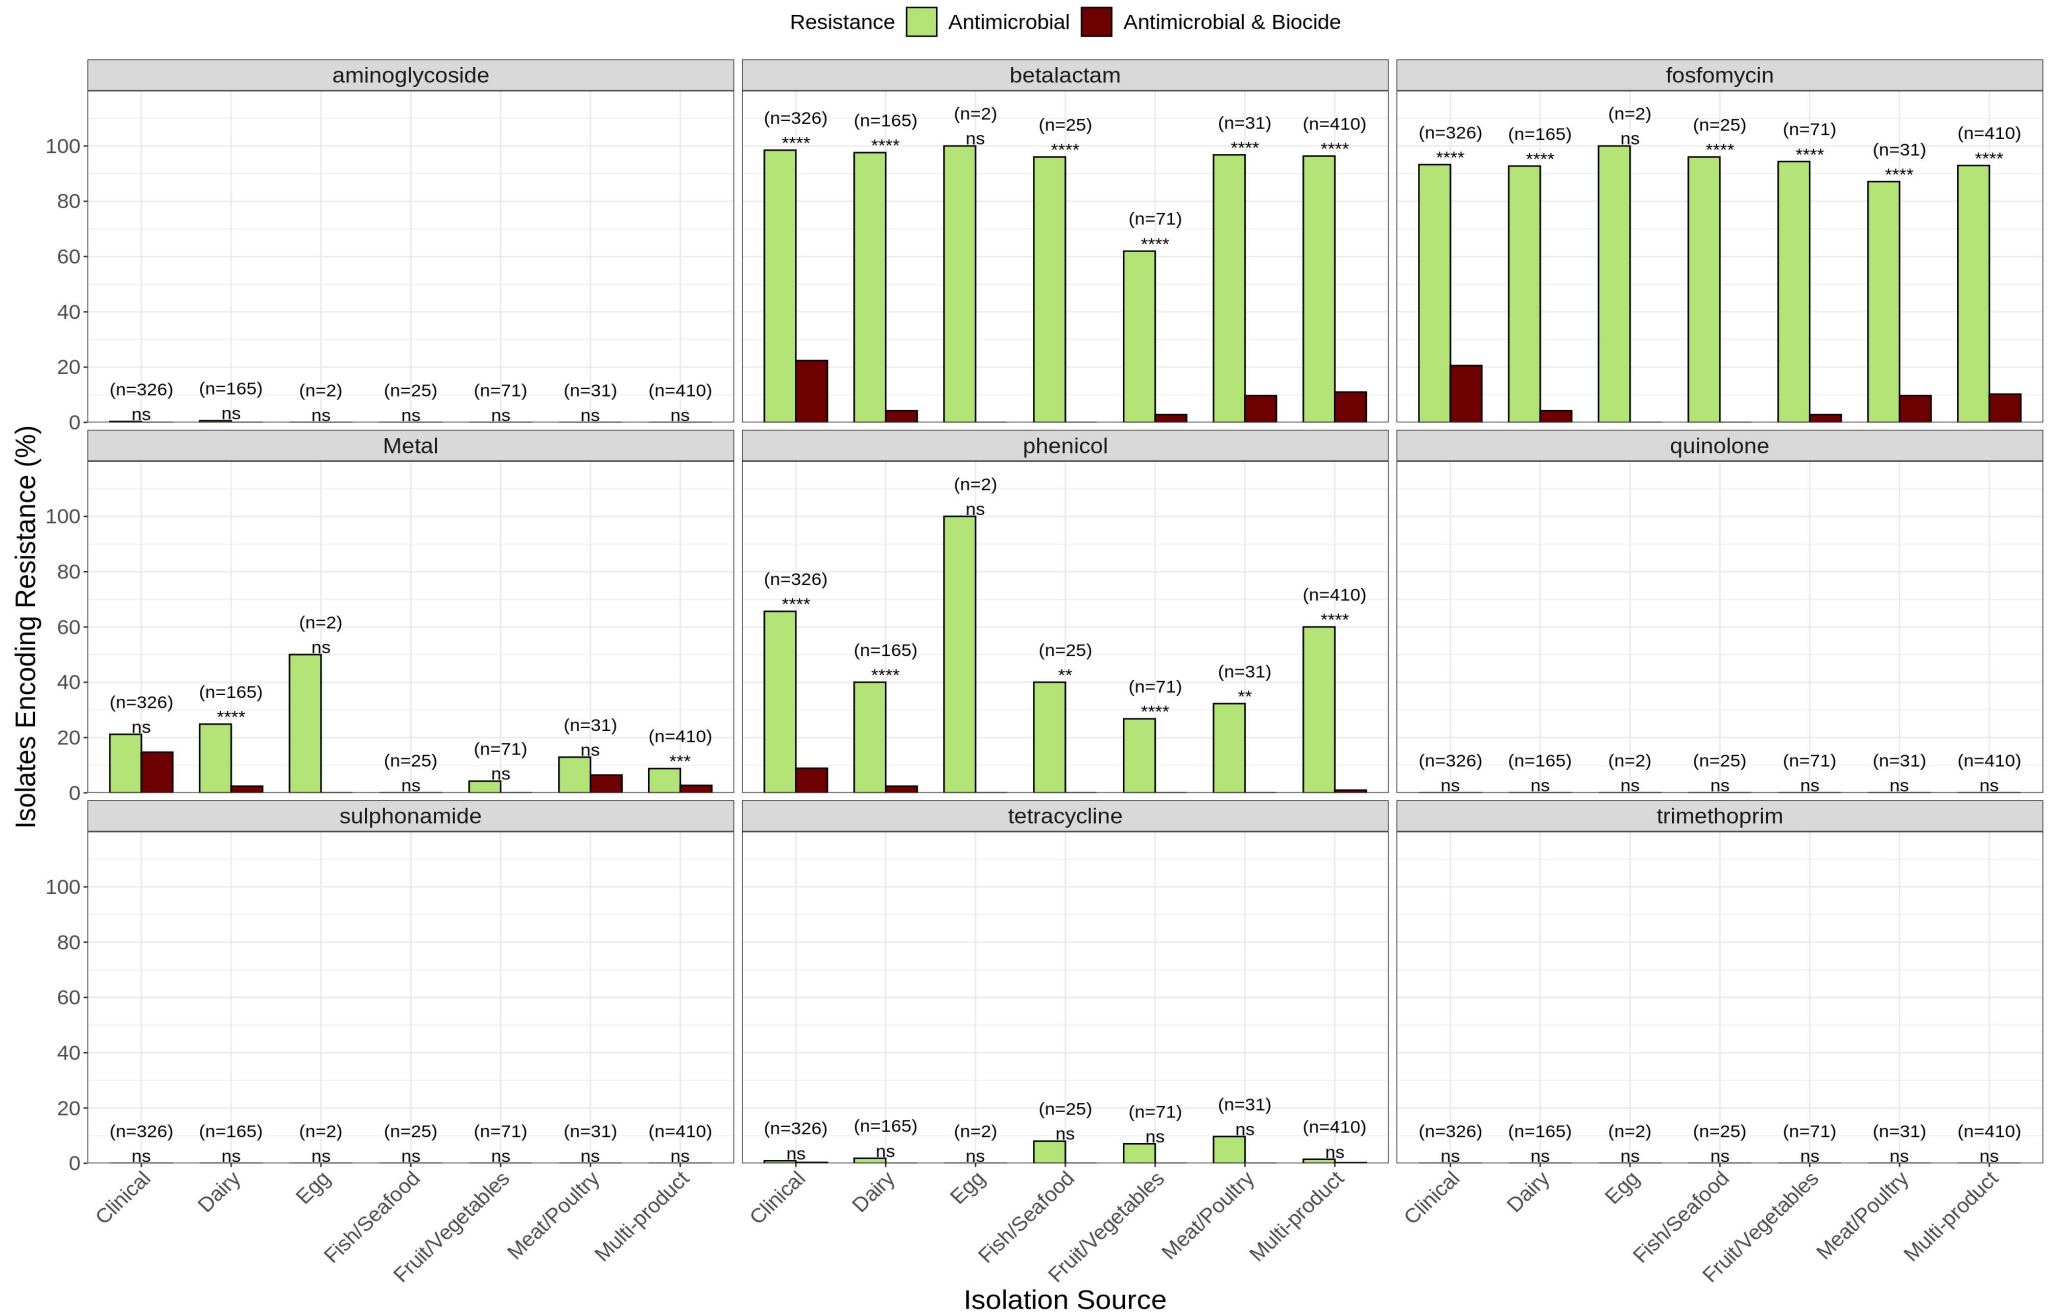

Resistance ■ Antimicrobial ■ Antimicrobial & Biocide

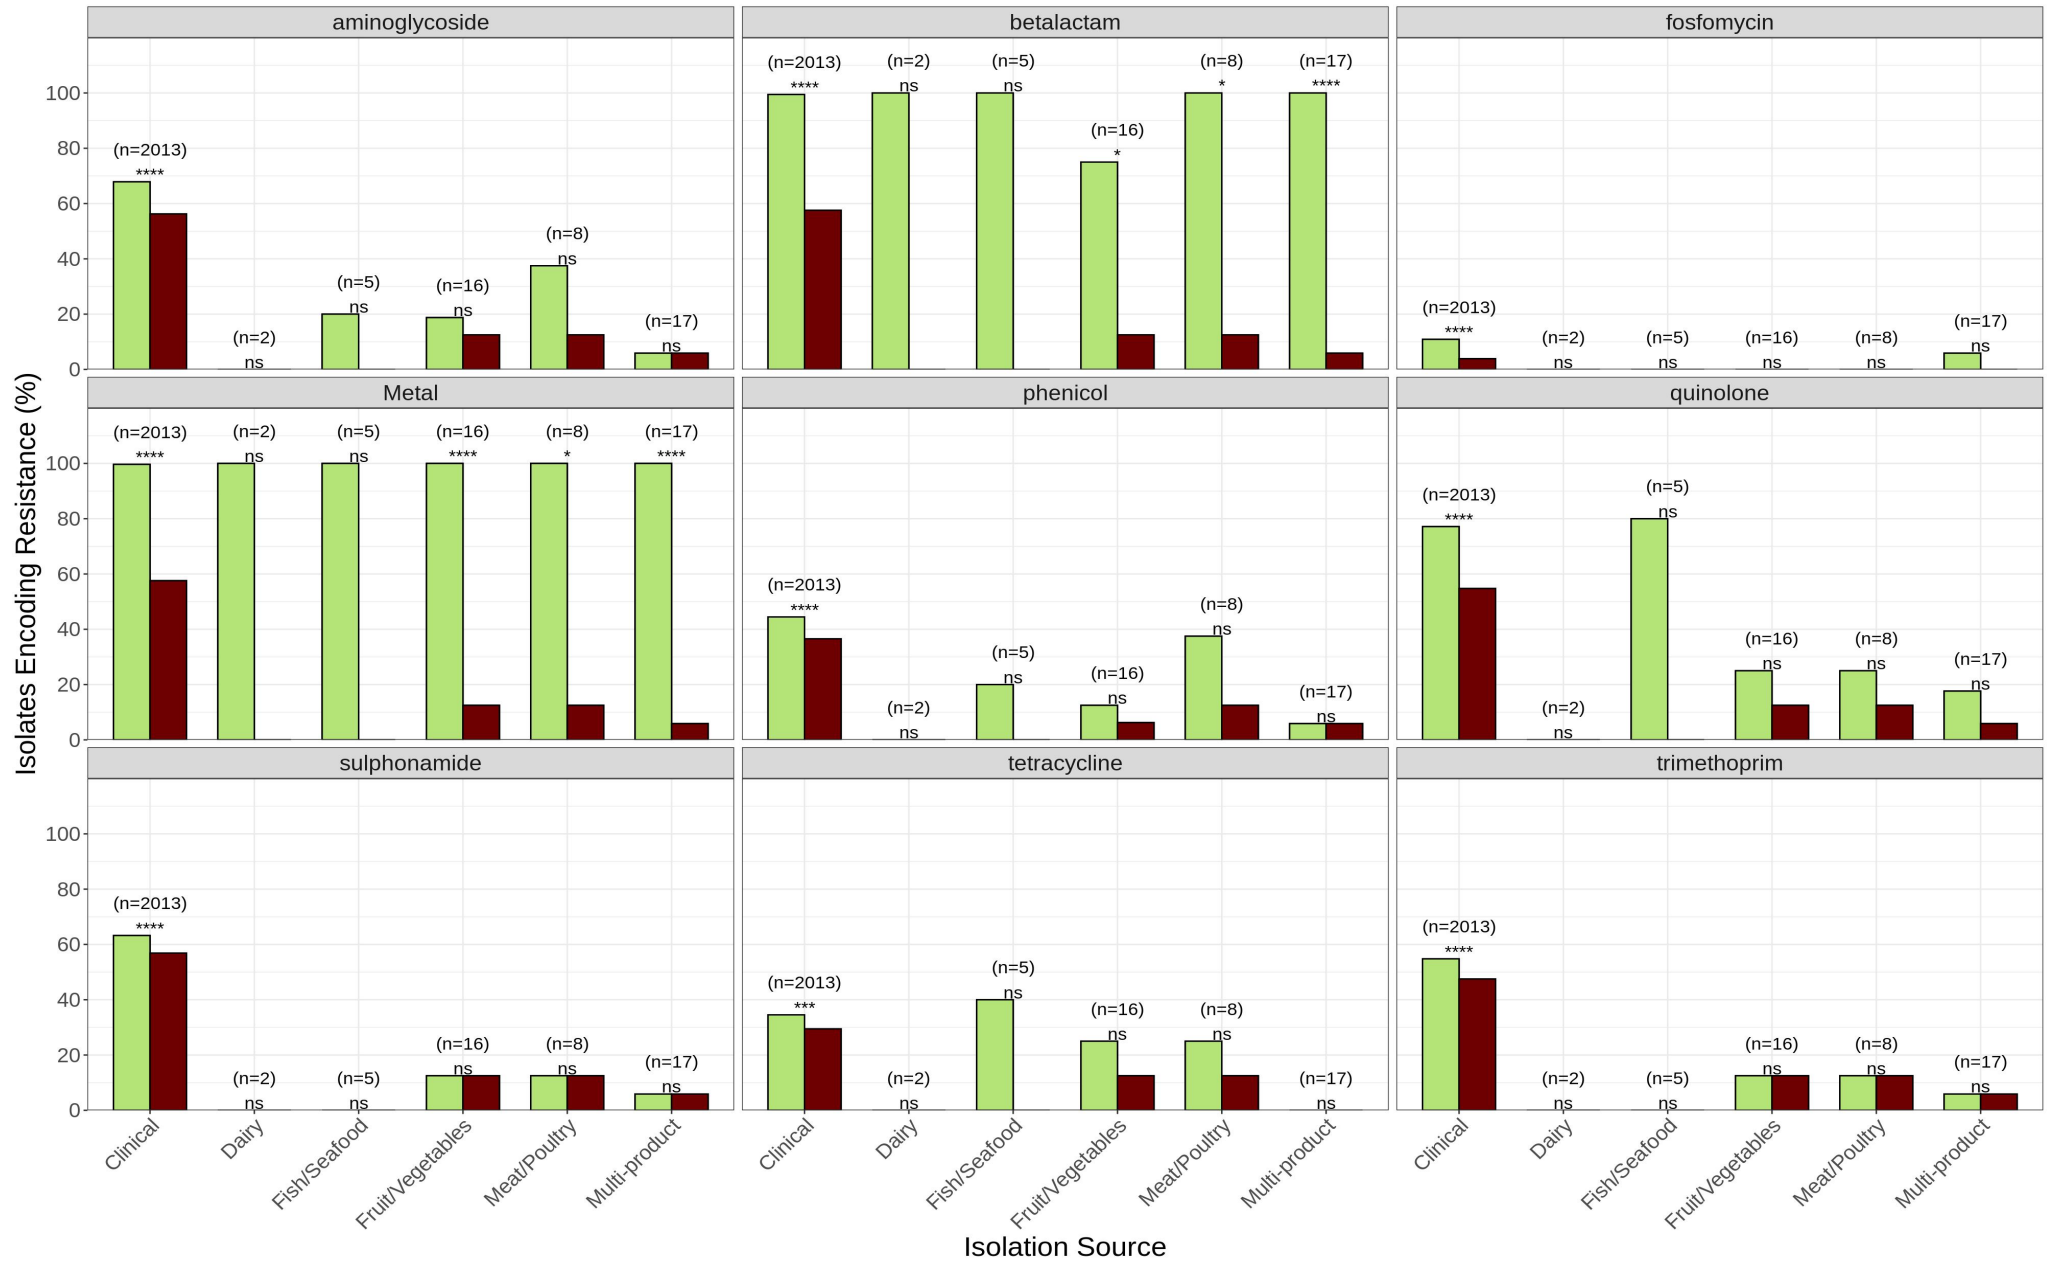



# Clostridium

Resistance ■ Antimicrobial ■ Antimicrobial & Biocide

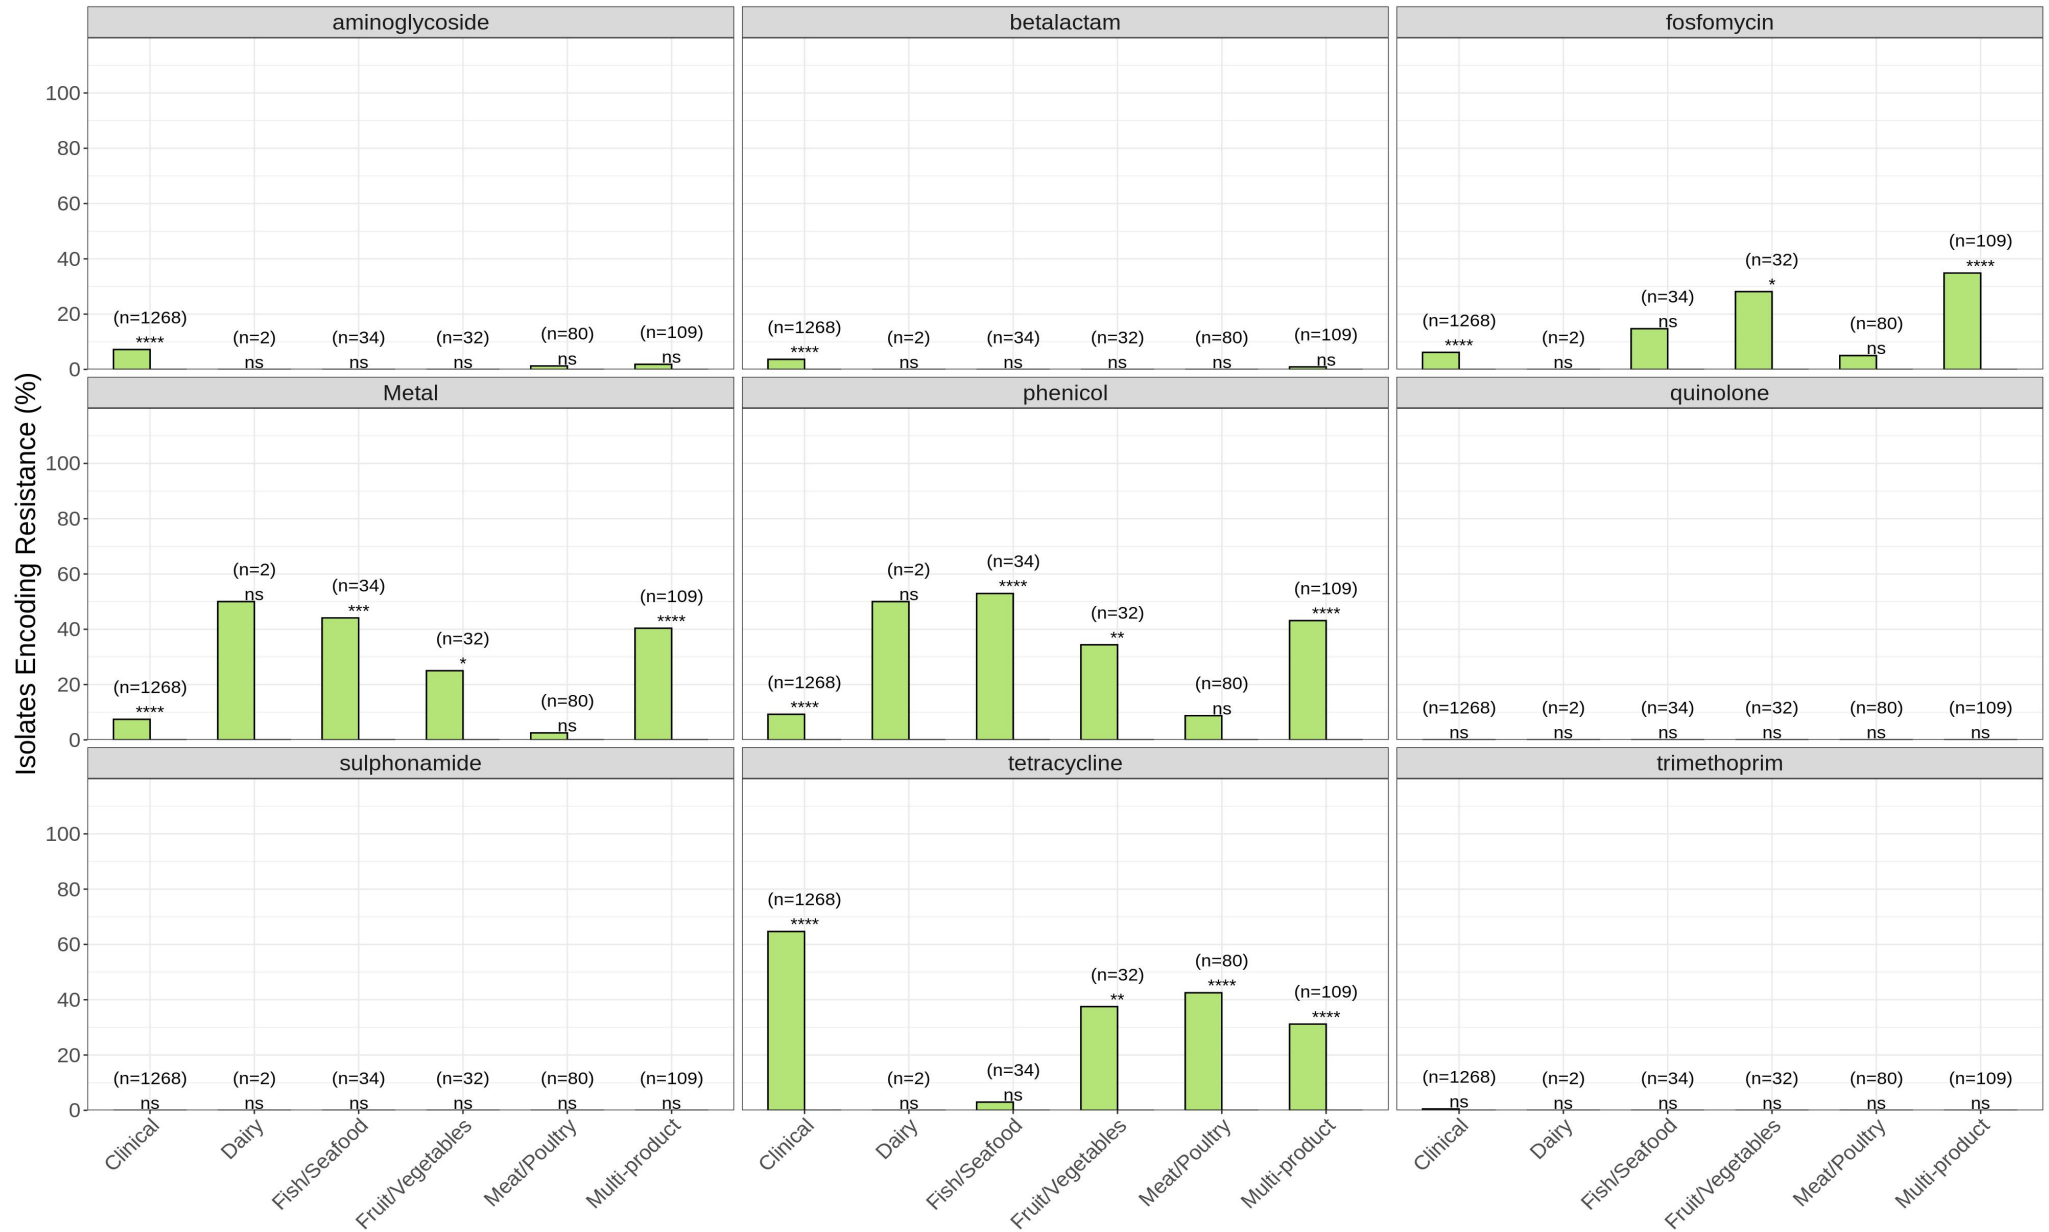

Resistance ■ Antimicrobial ■ Antimicrobial & Biocide

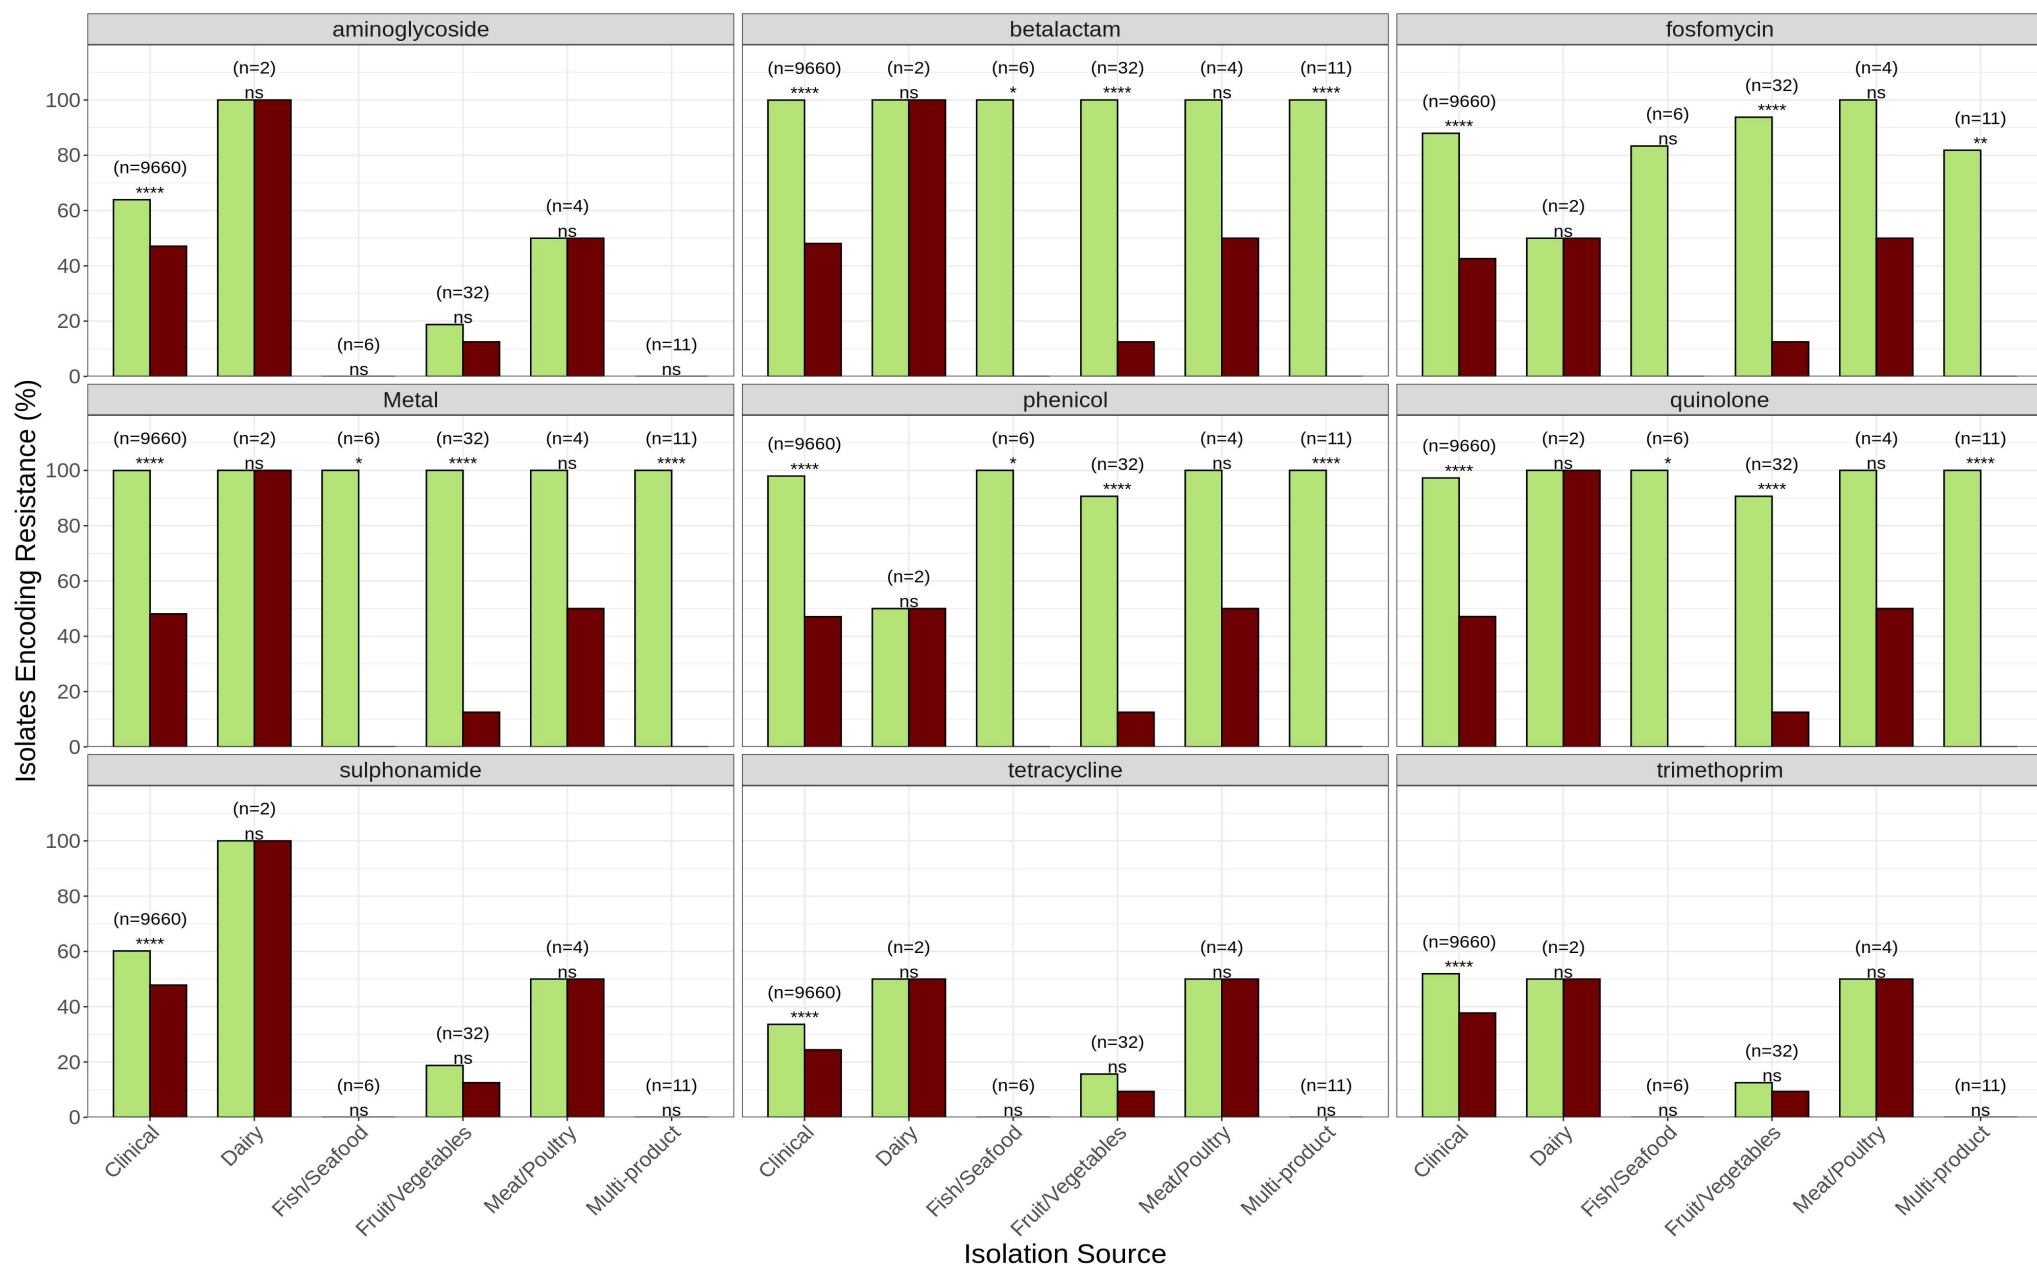

# Enterococcus

Resistance Antimicrobial Antimicrobial & Biocide

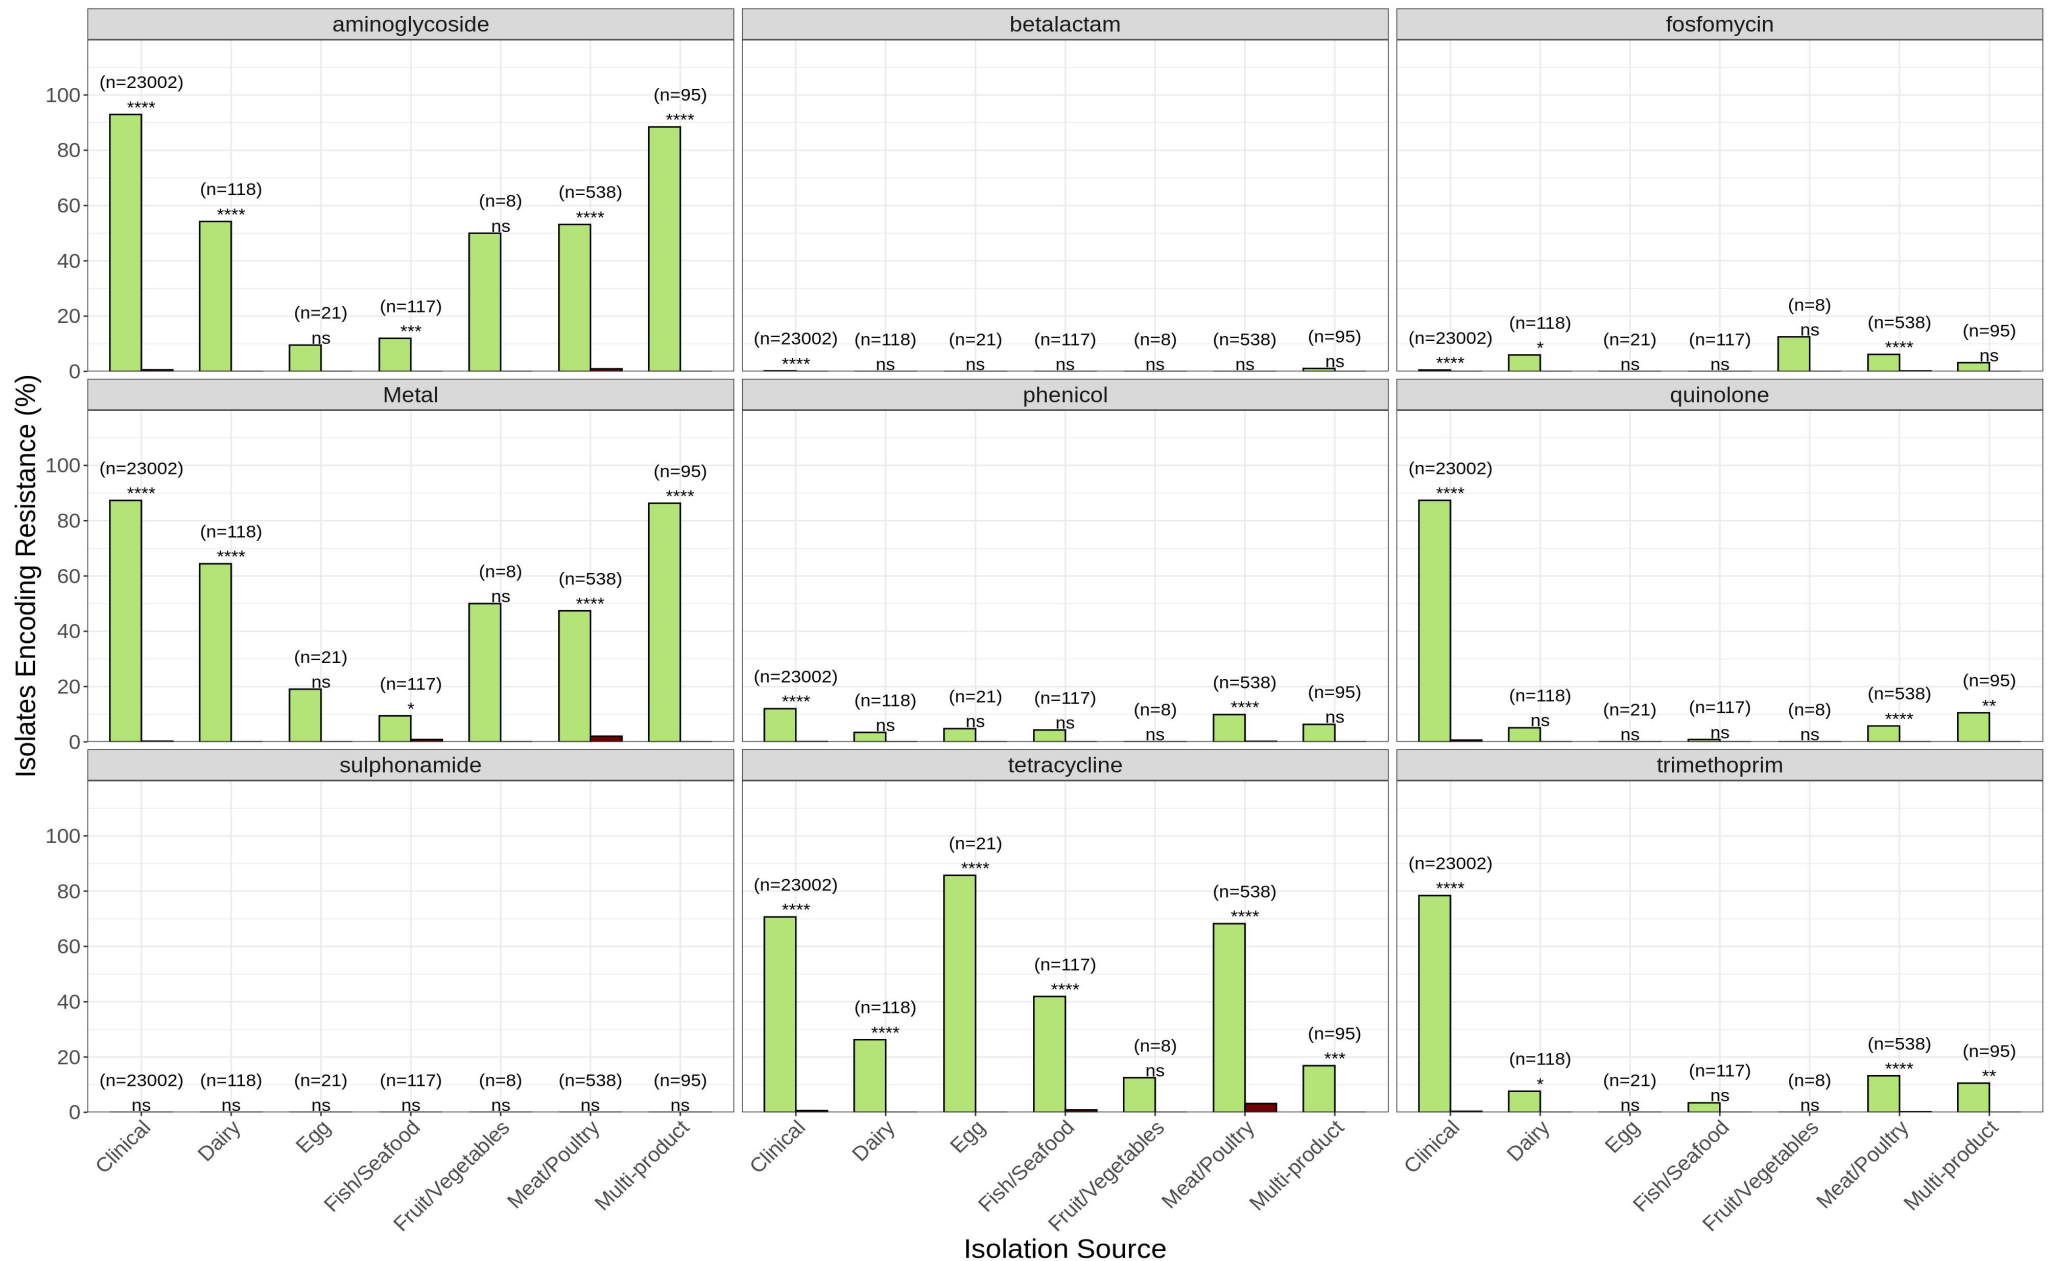

Resistance Antimicrobial Antimicrobial & Biocide

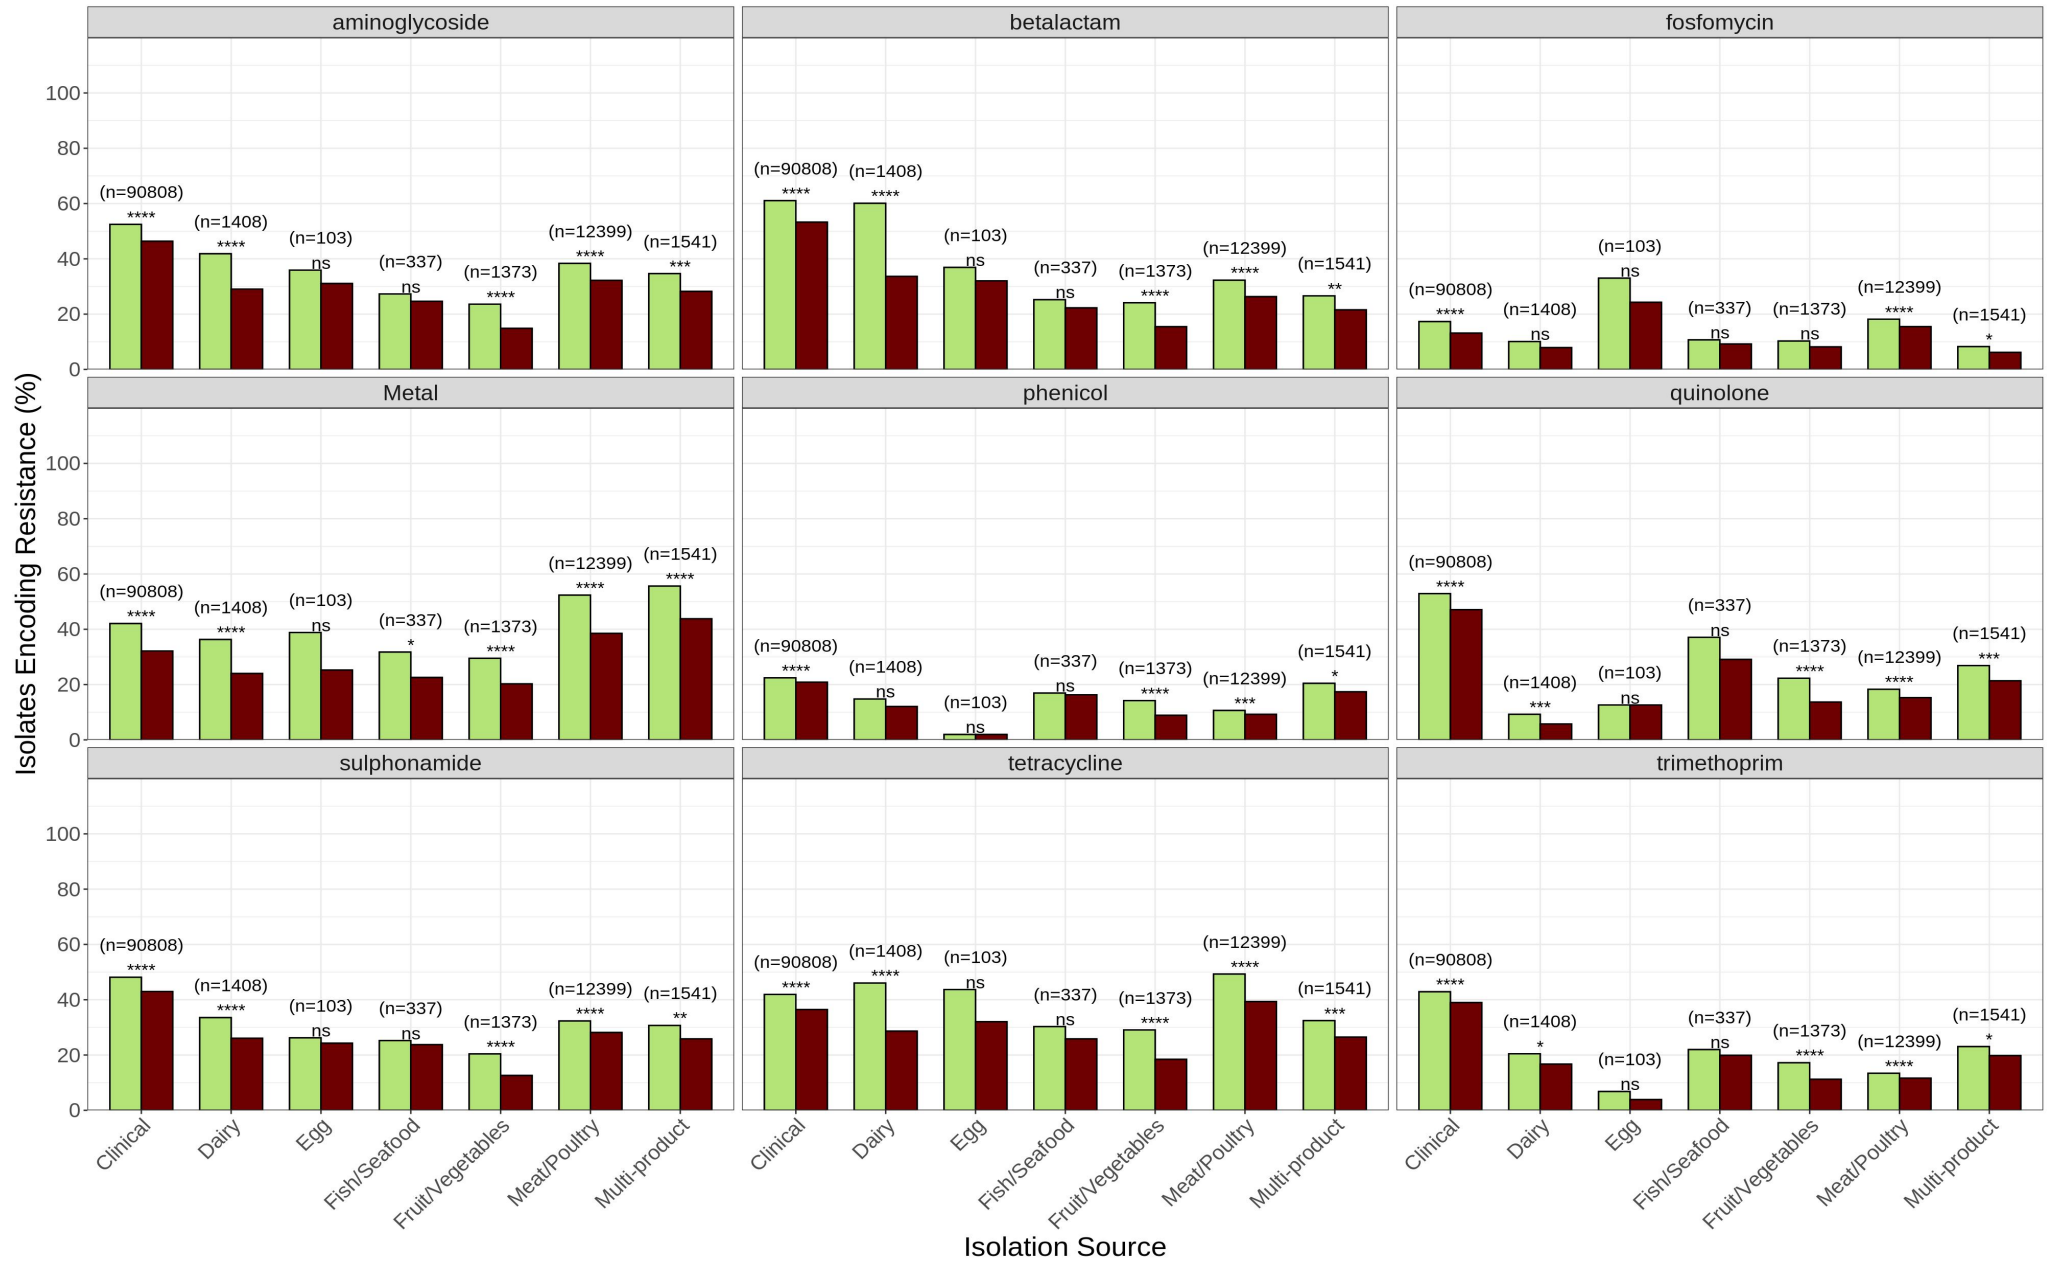

Resistance Antimicrobial Antimicrobial & Biocide

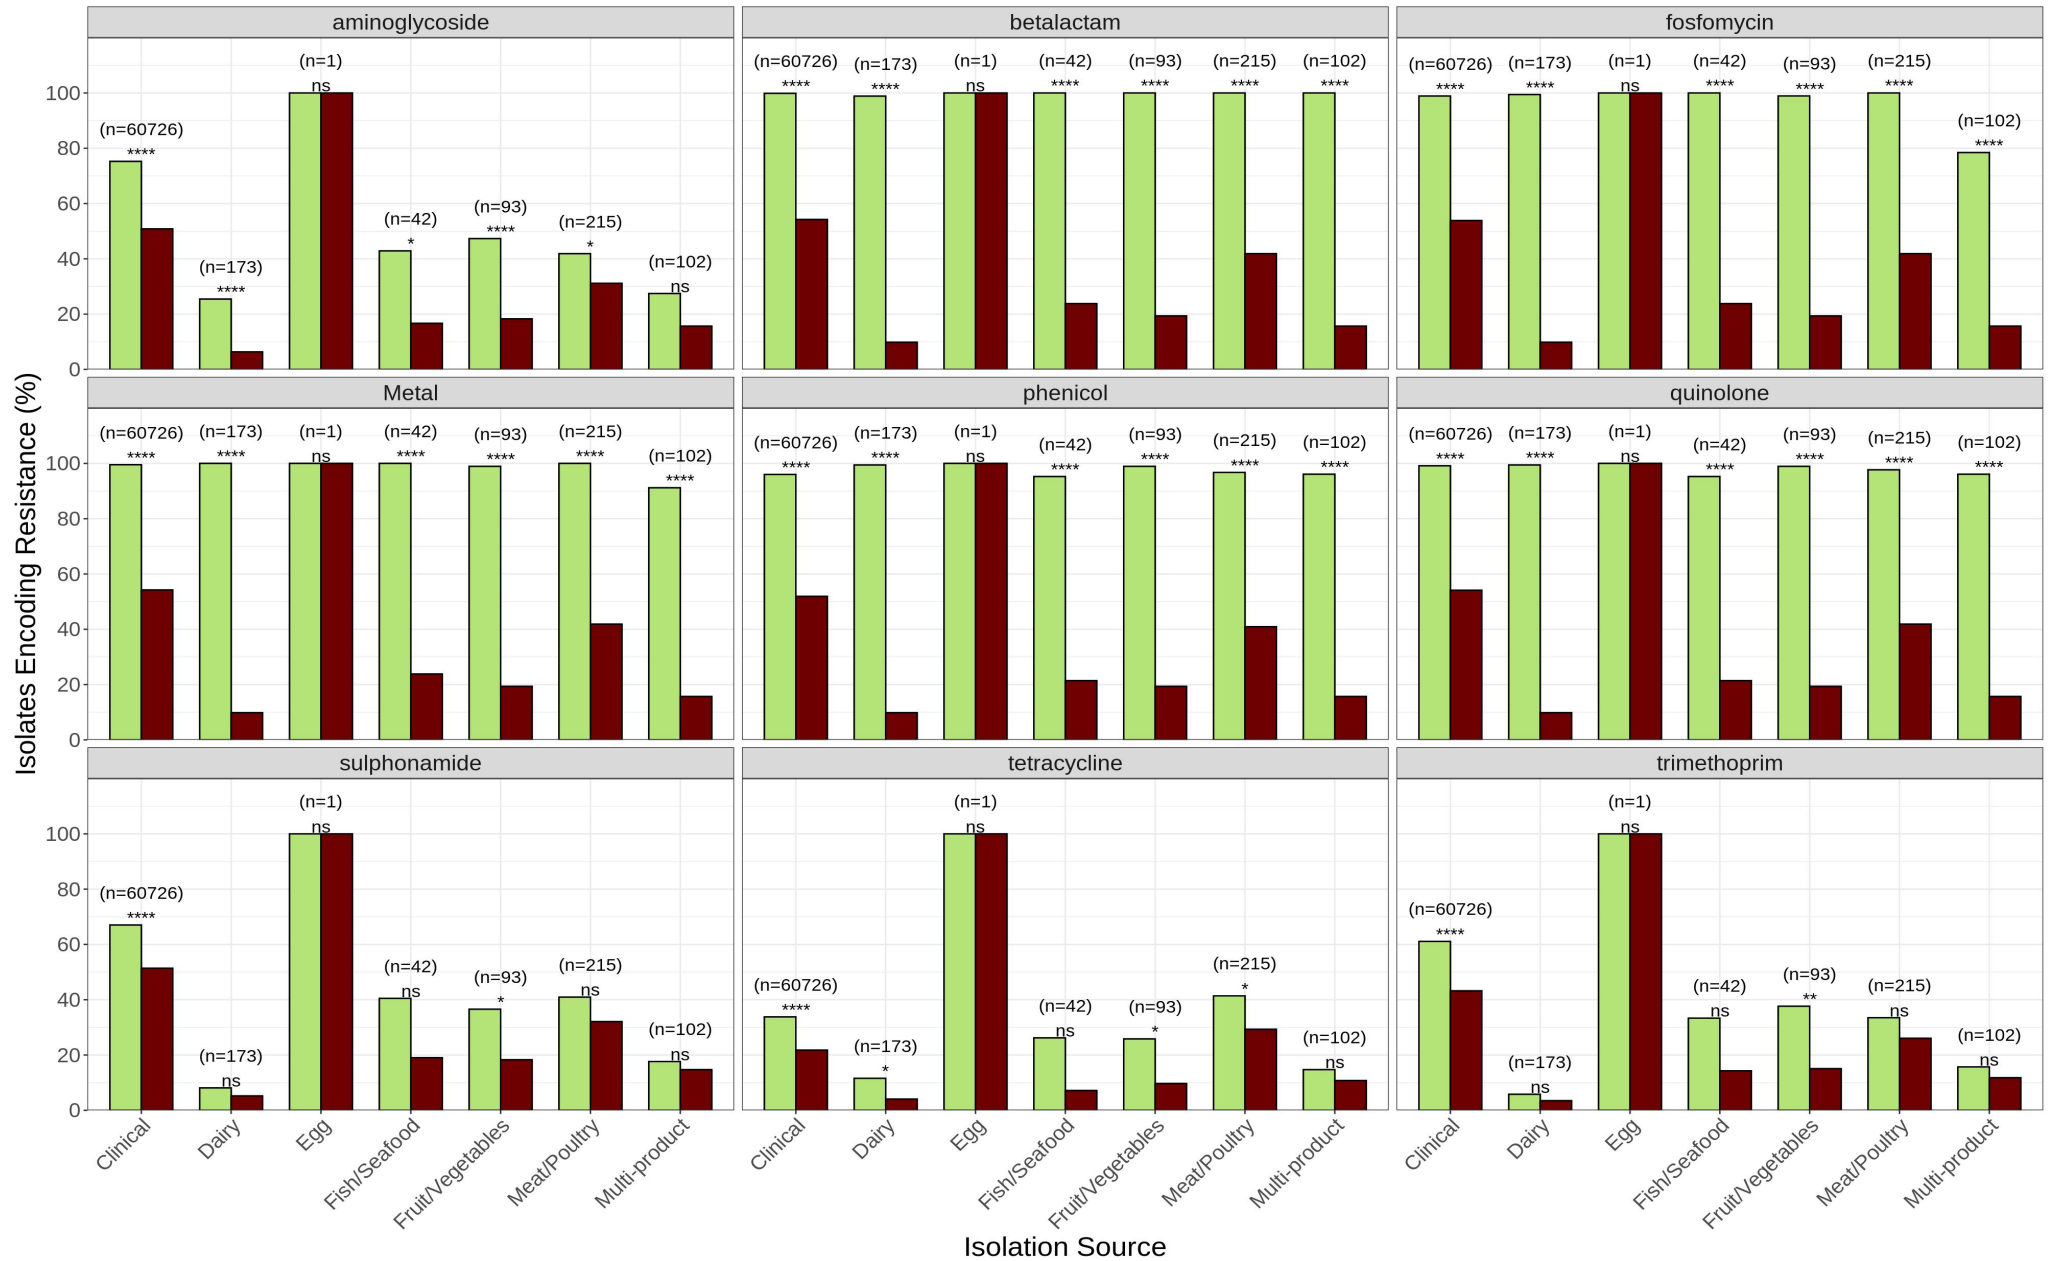

*Listeria*

Resistance ■ Antimicrobial ■ Antimicrobial & Biocide

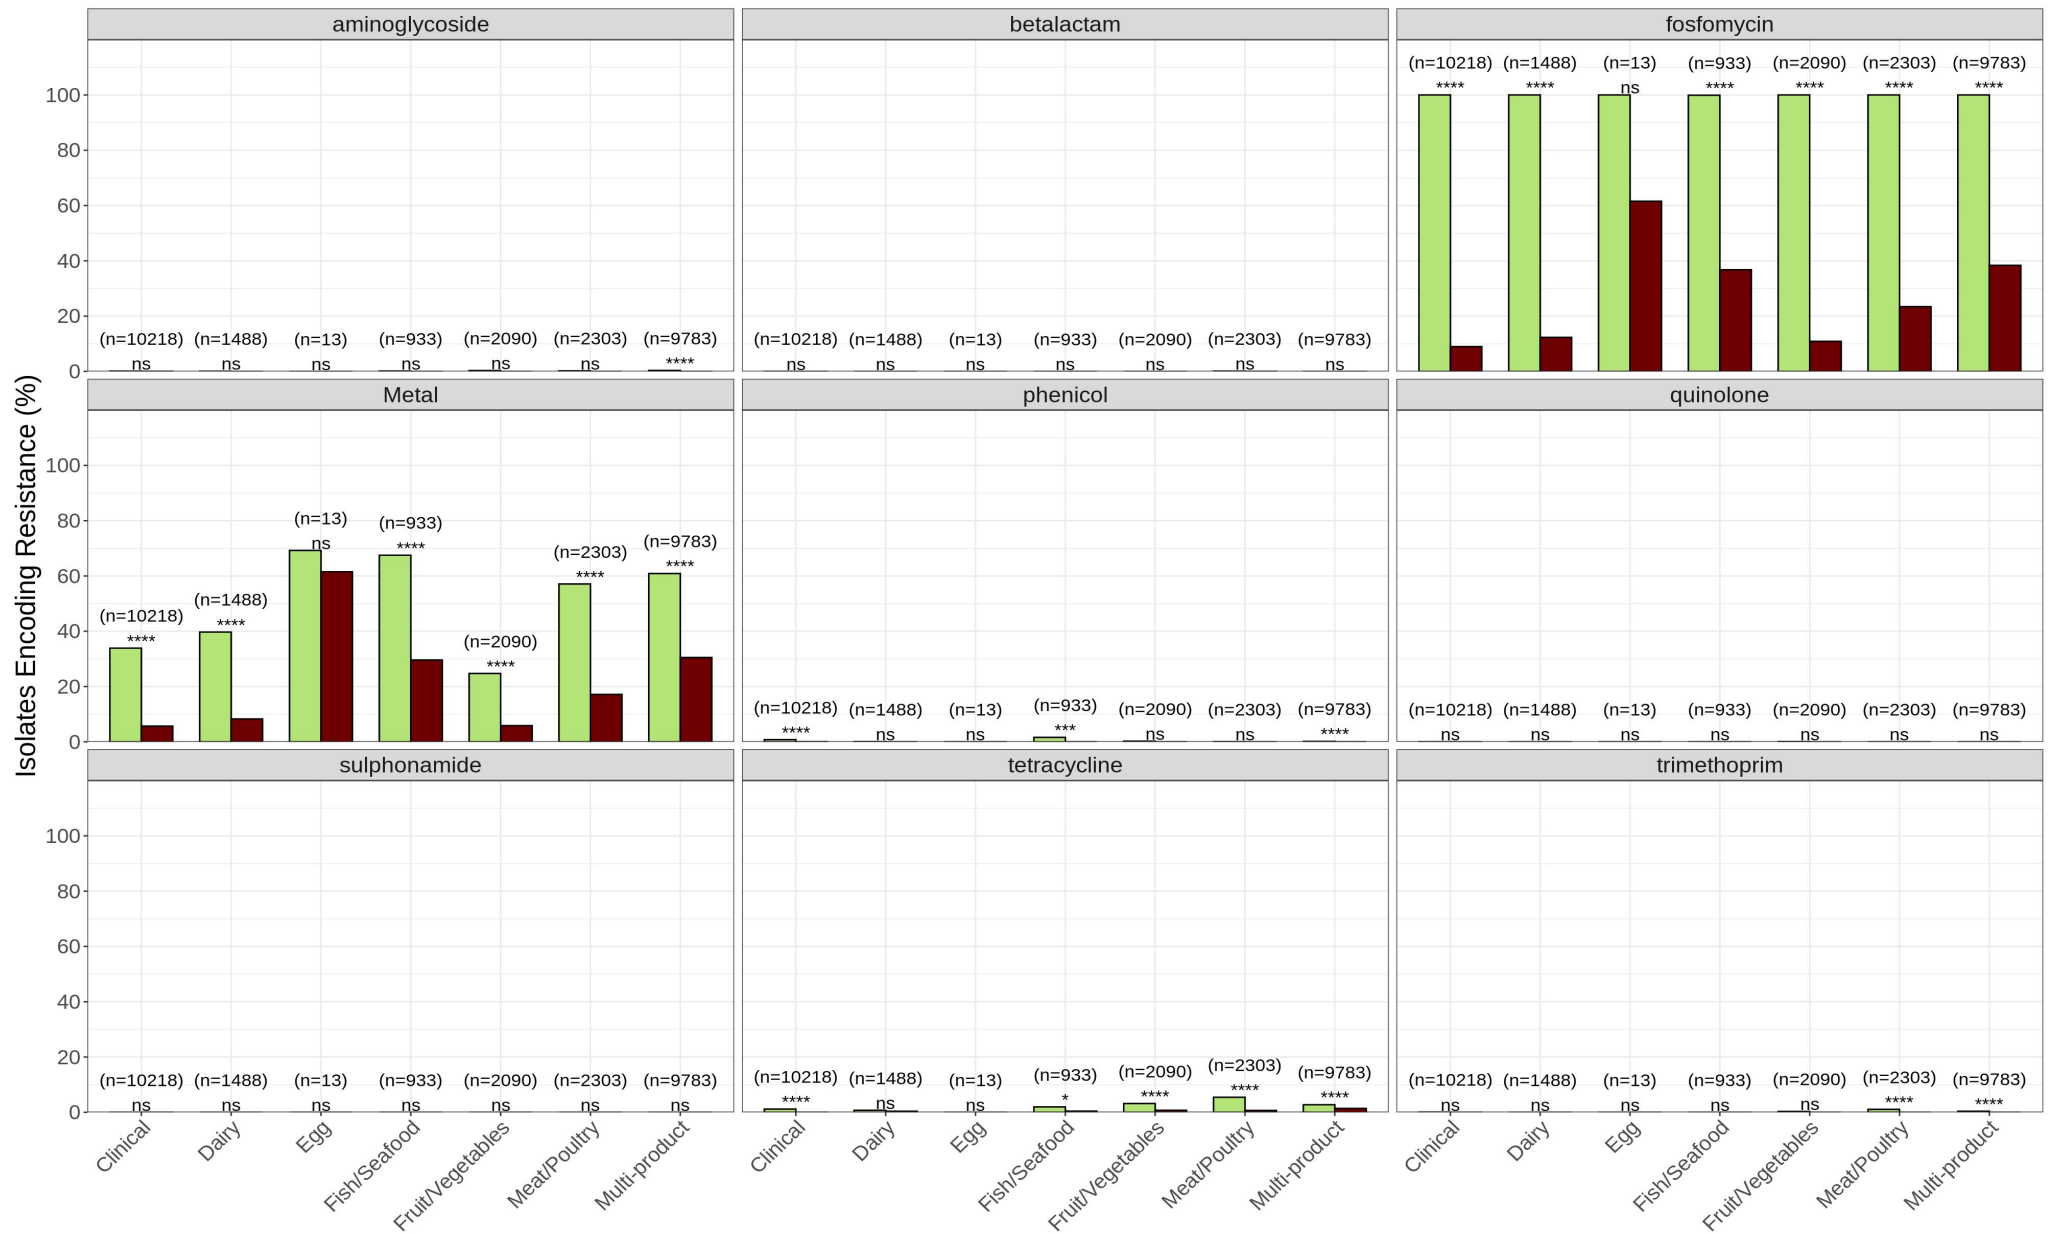

Resistance ■ Antimicrobial ■ Antimicrobial & Biocide

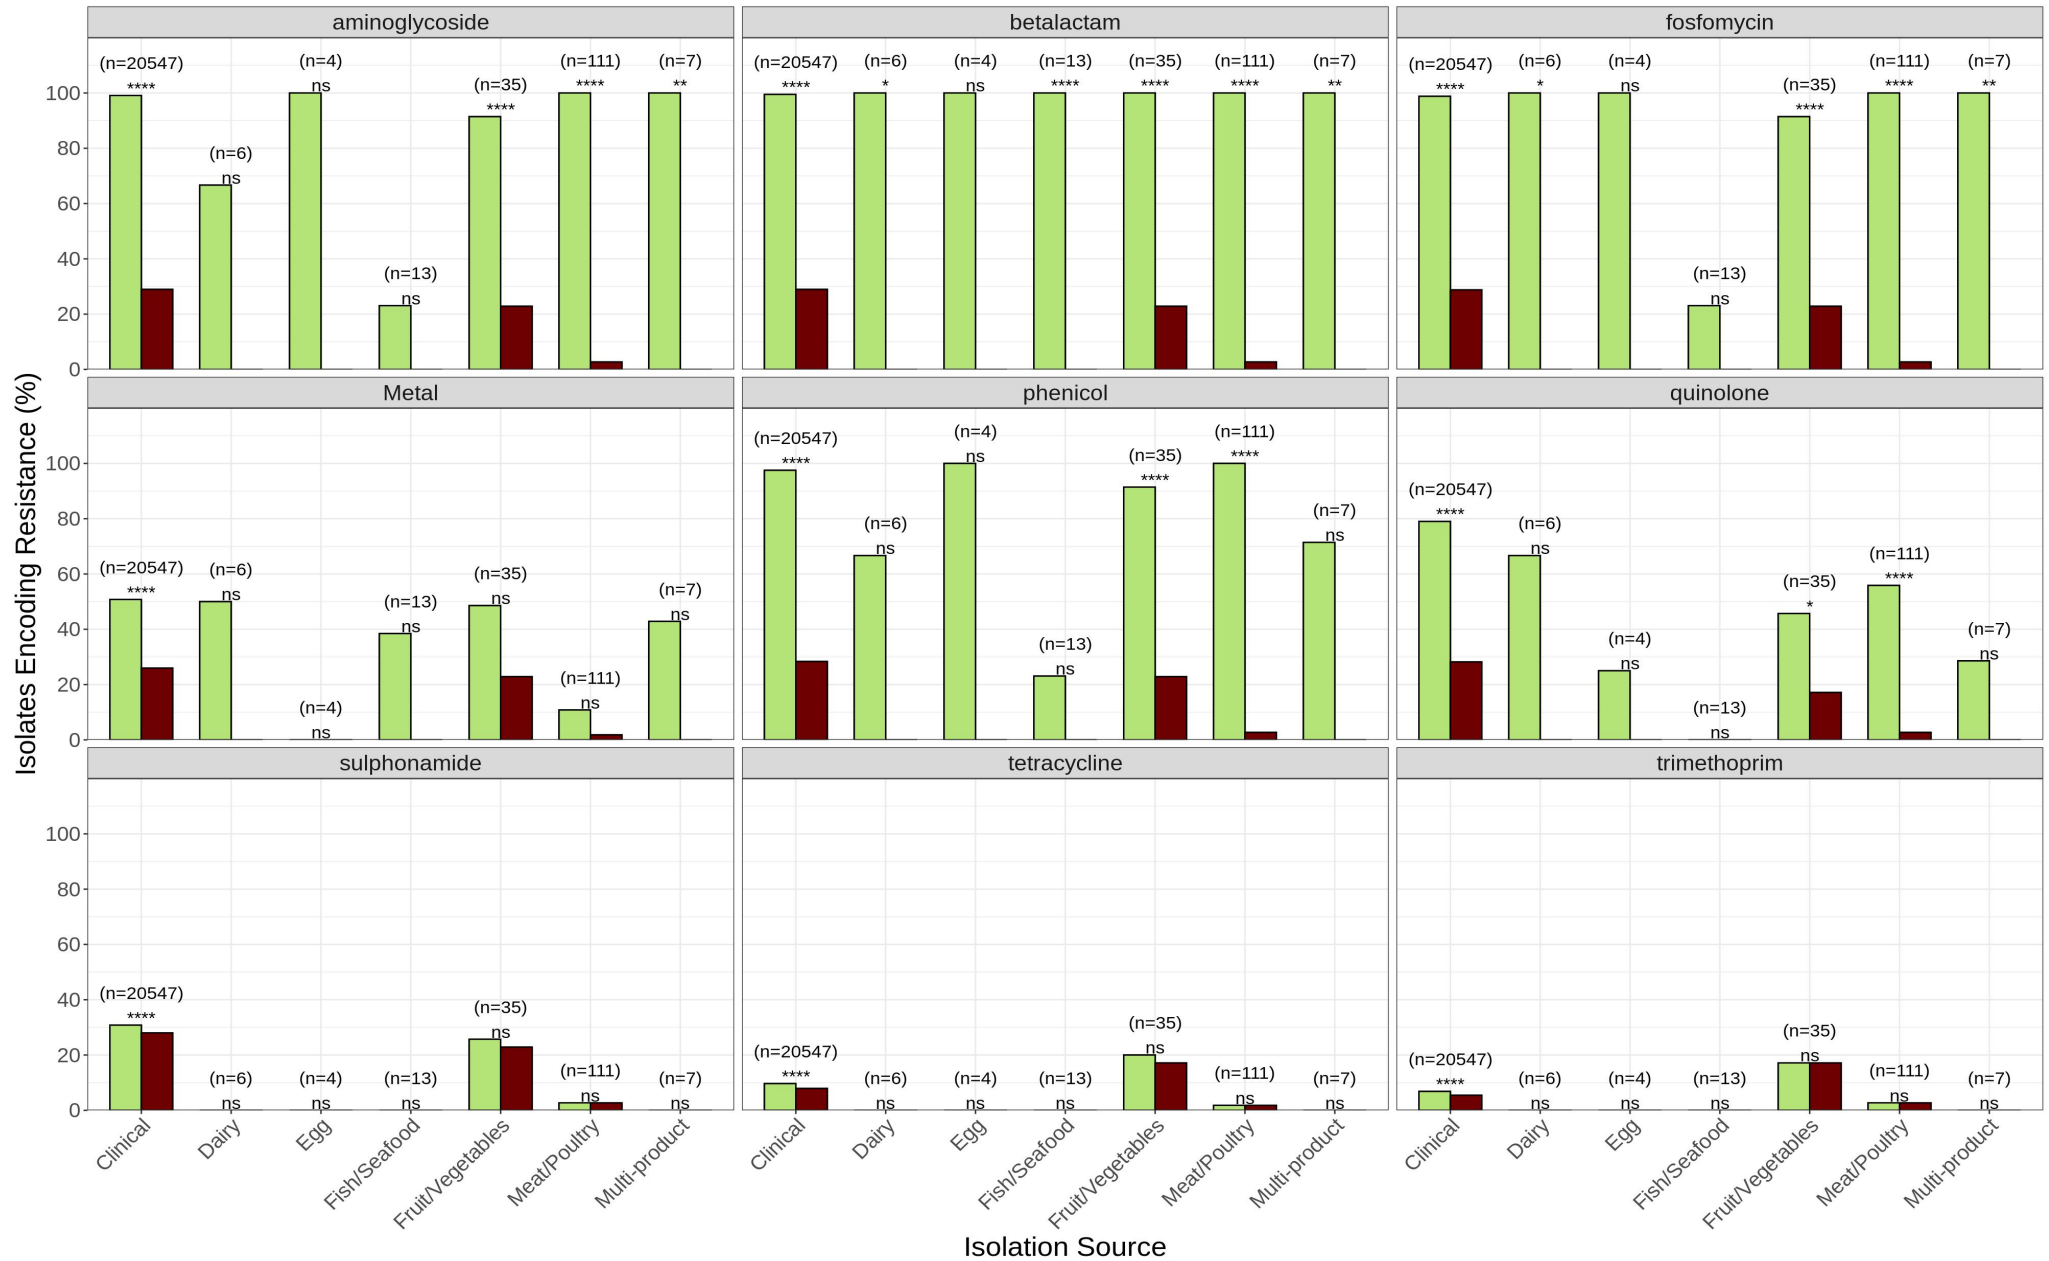

Resistance Antimicrobial Antimicrobial & Biocide

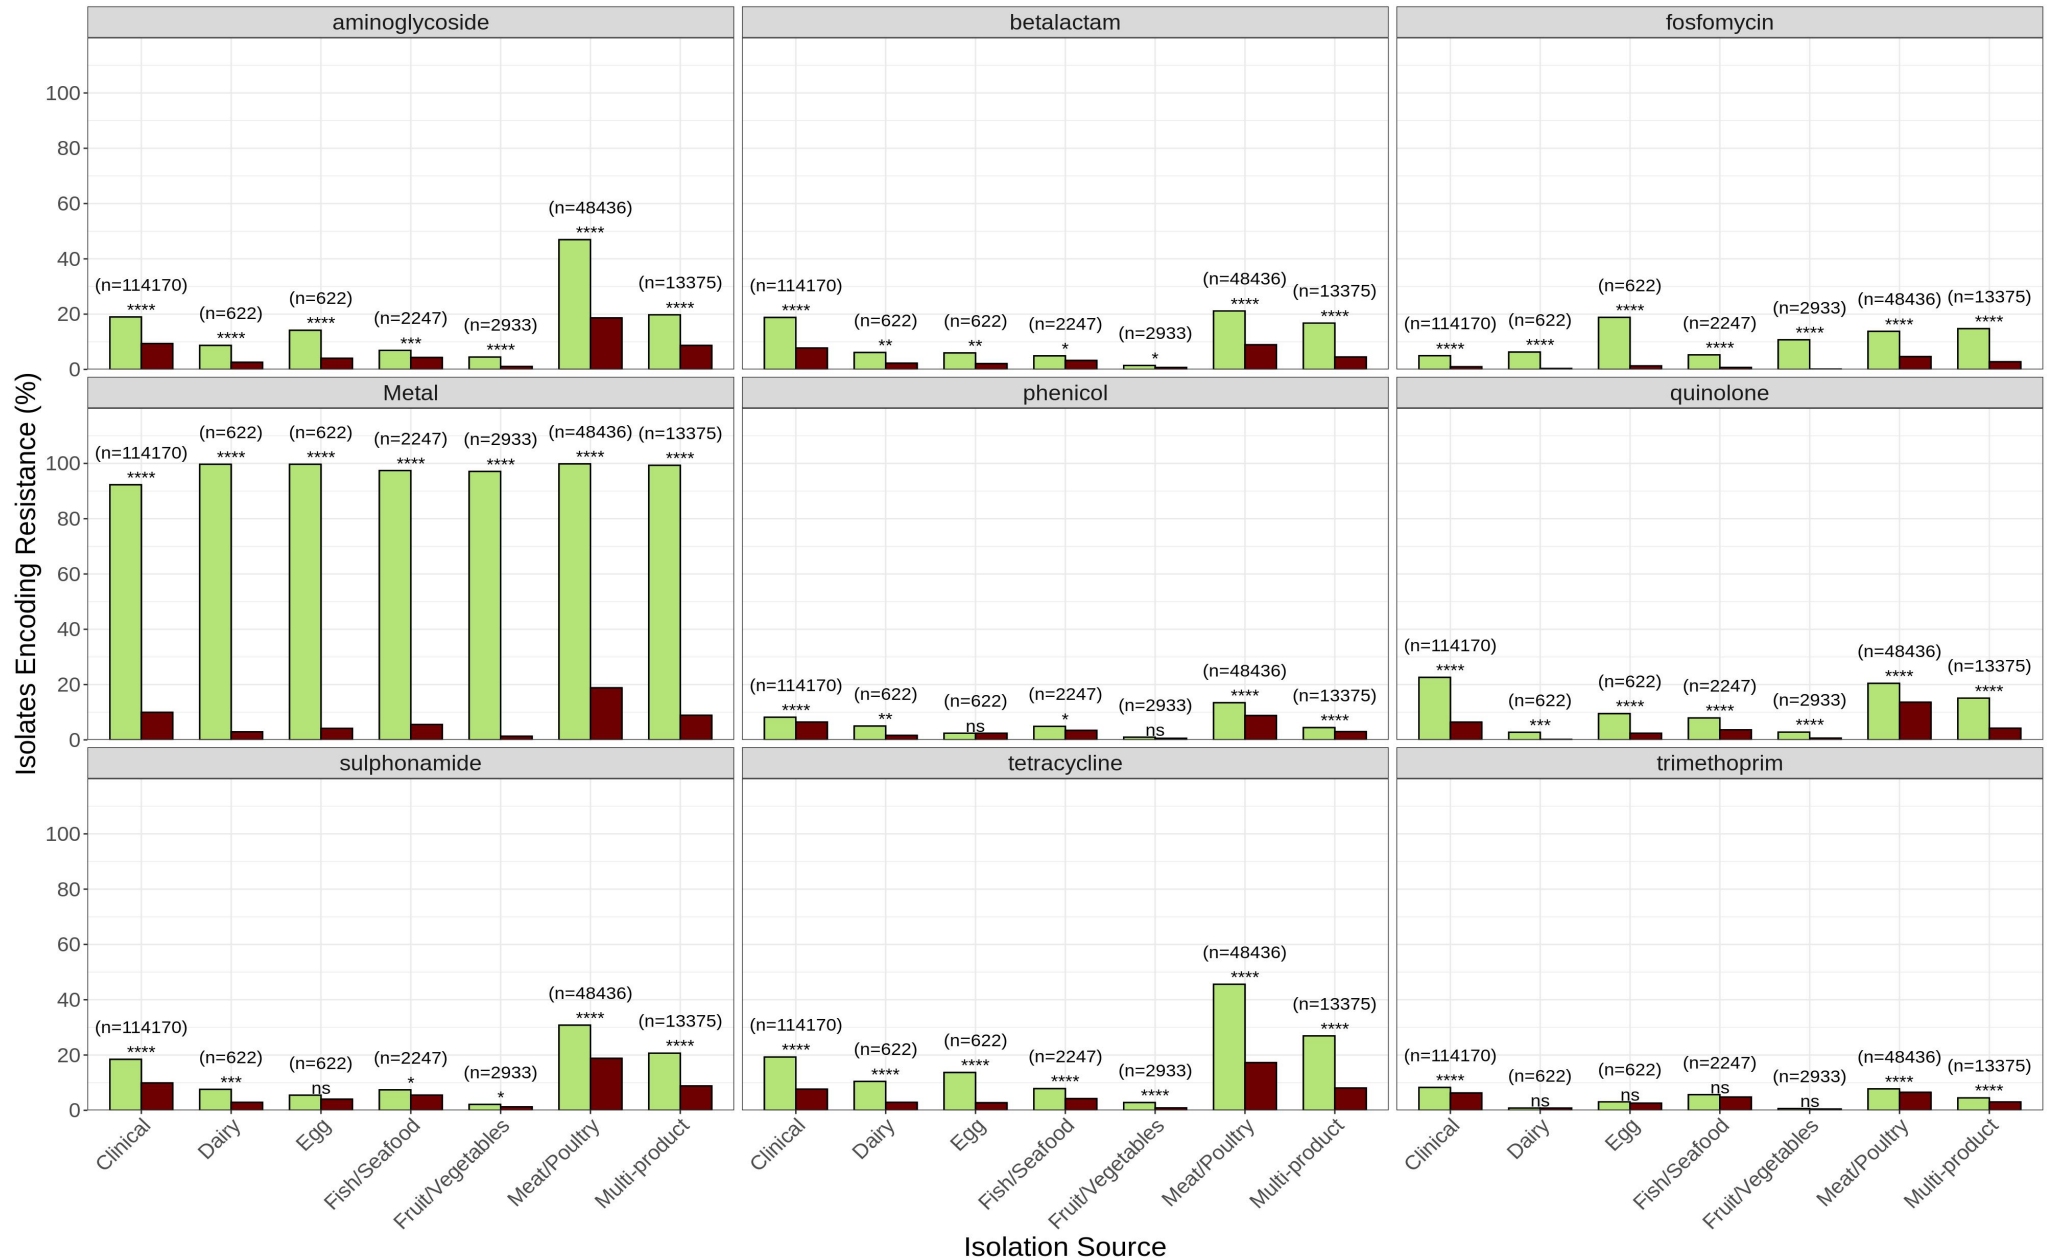



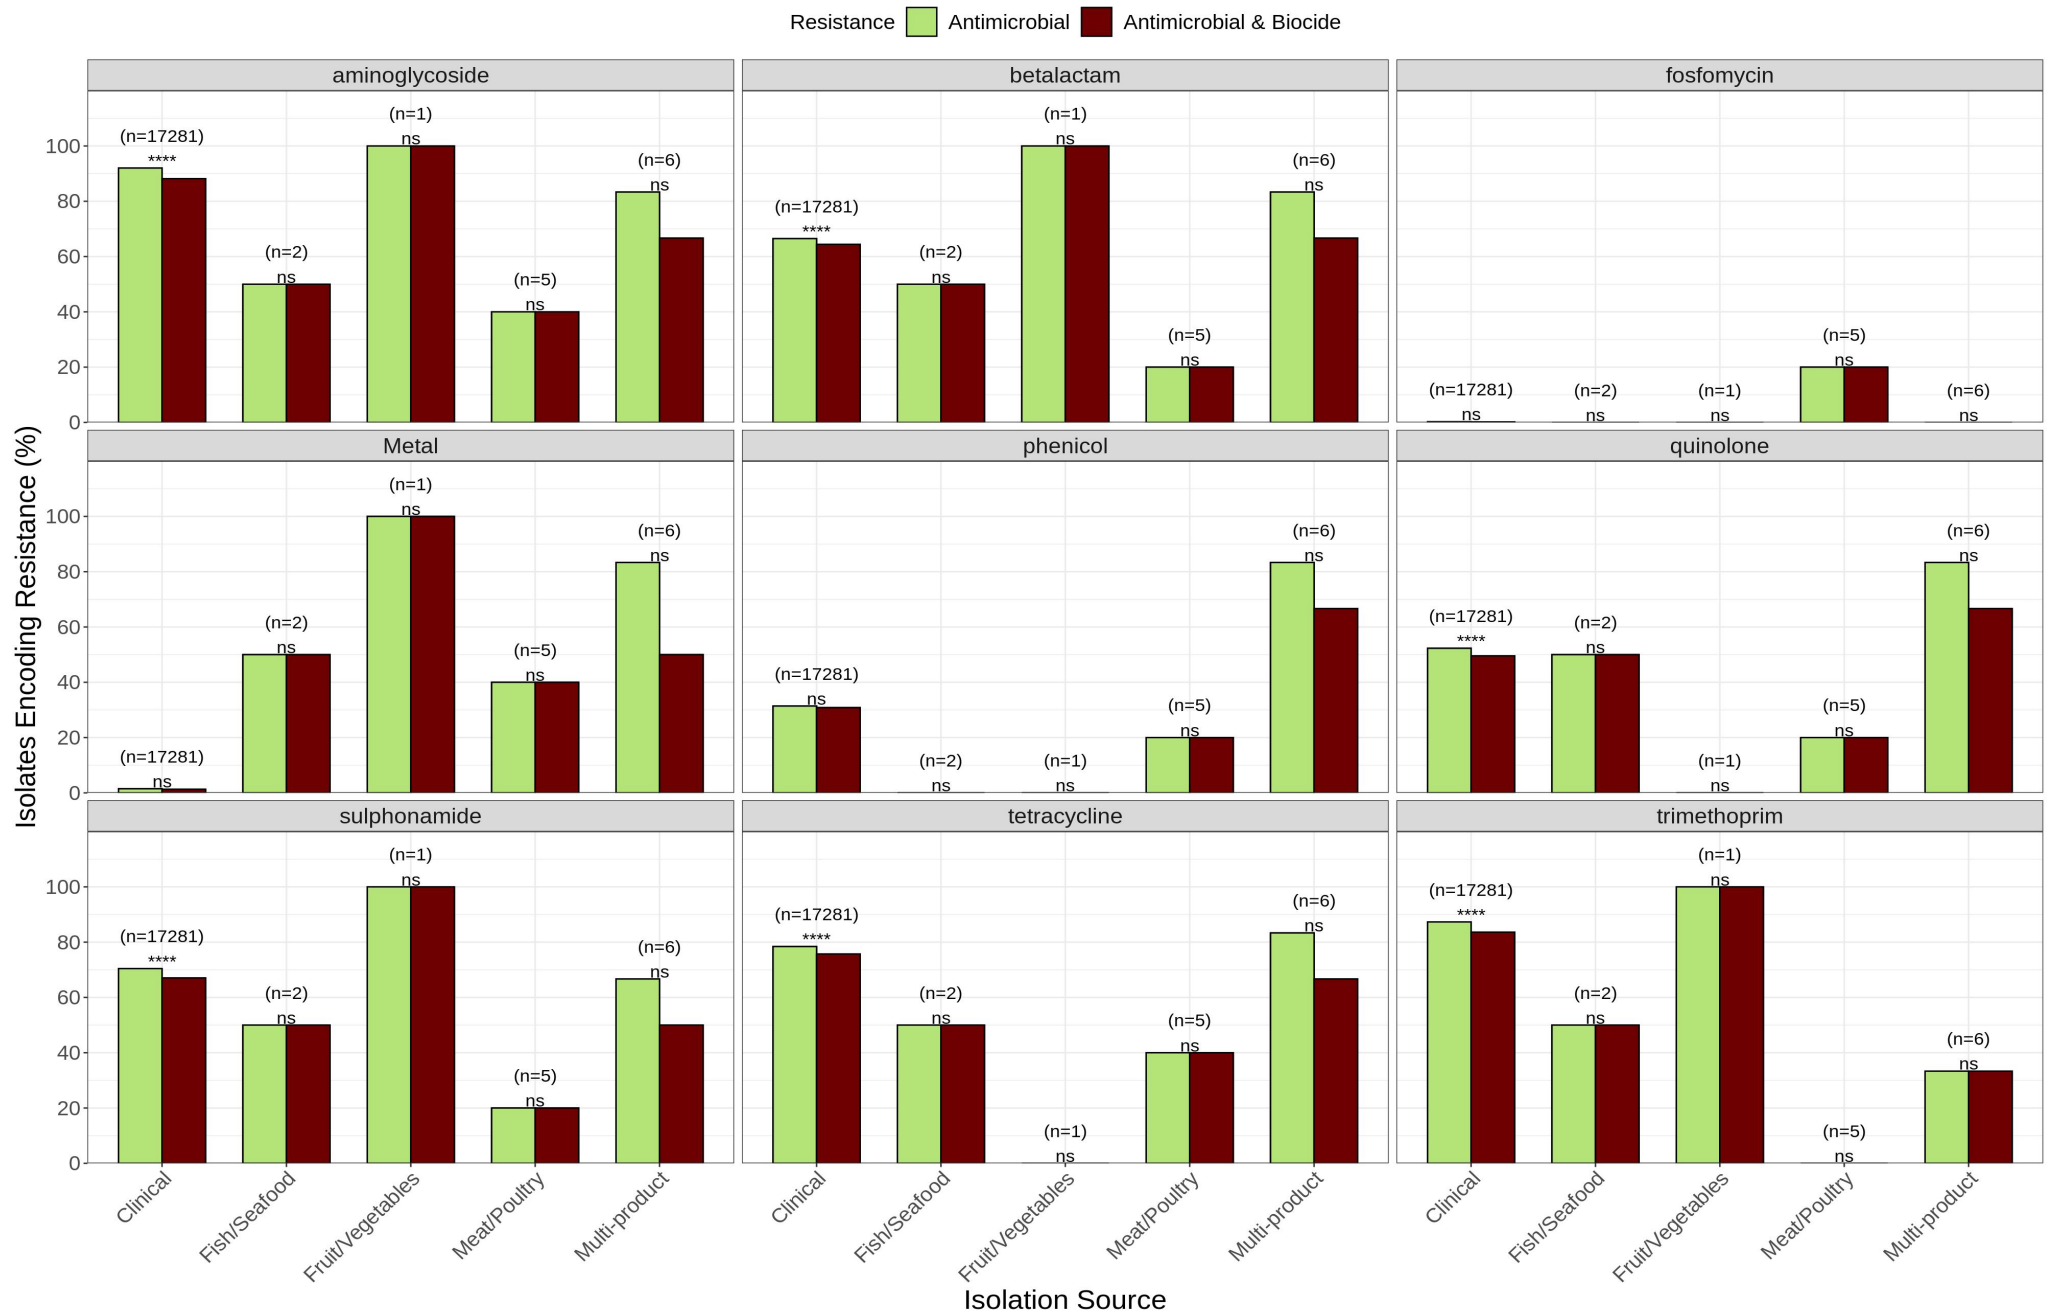

# Staphylococcus

Resistance Antimicrobial Antimicrobial & Biocide

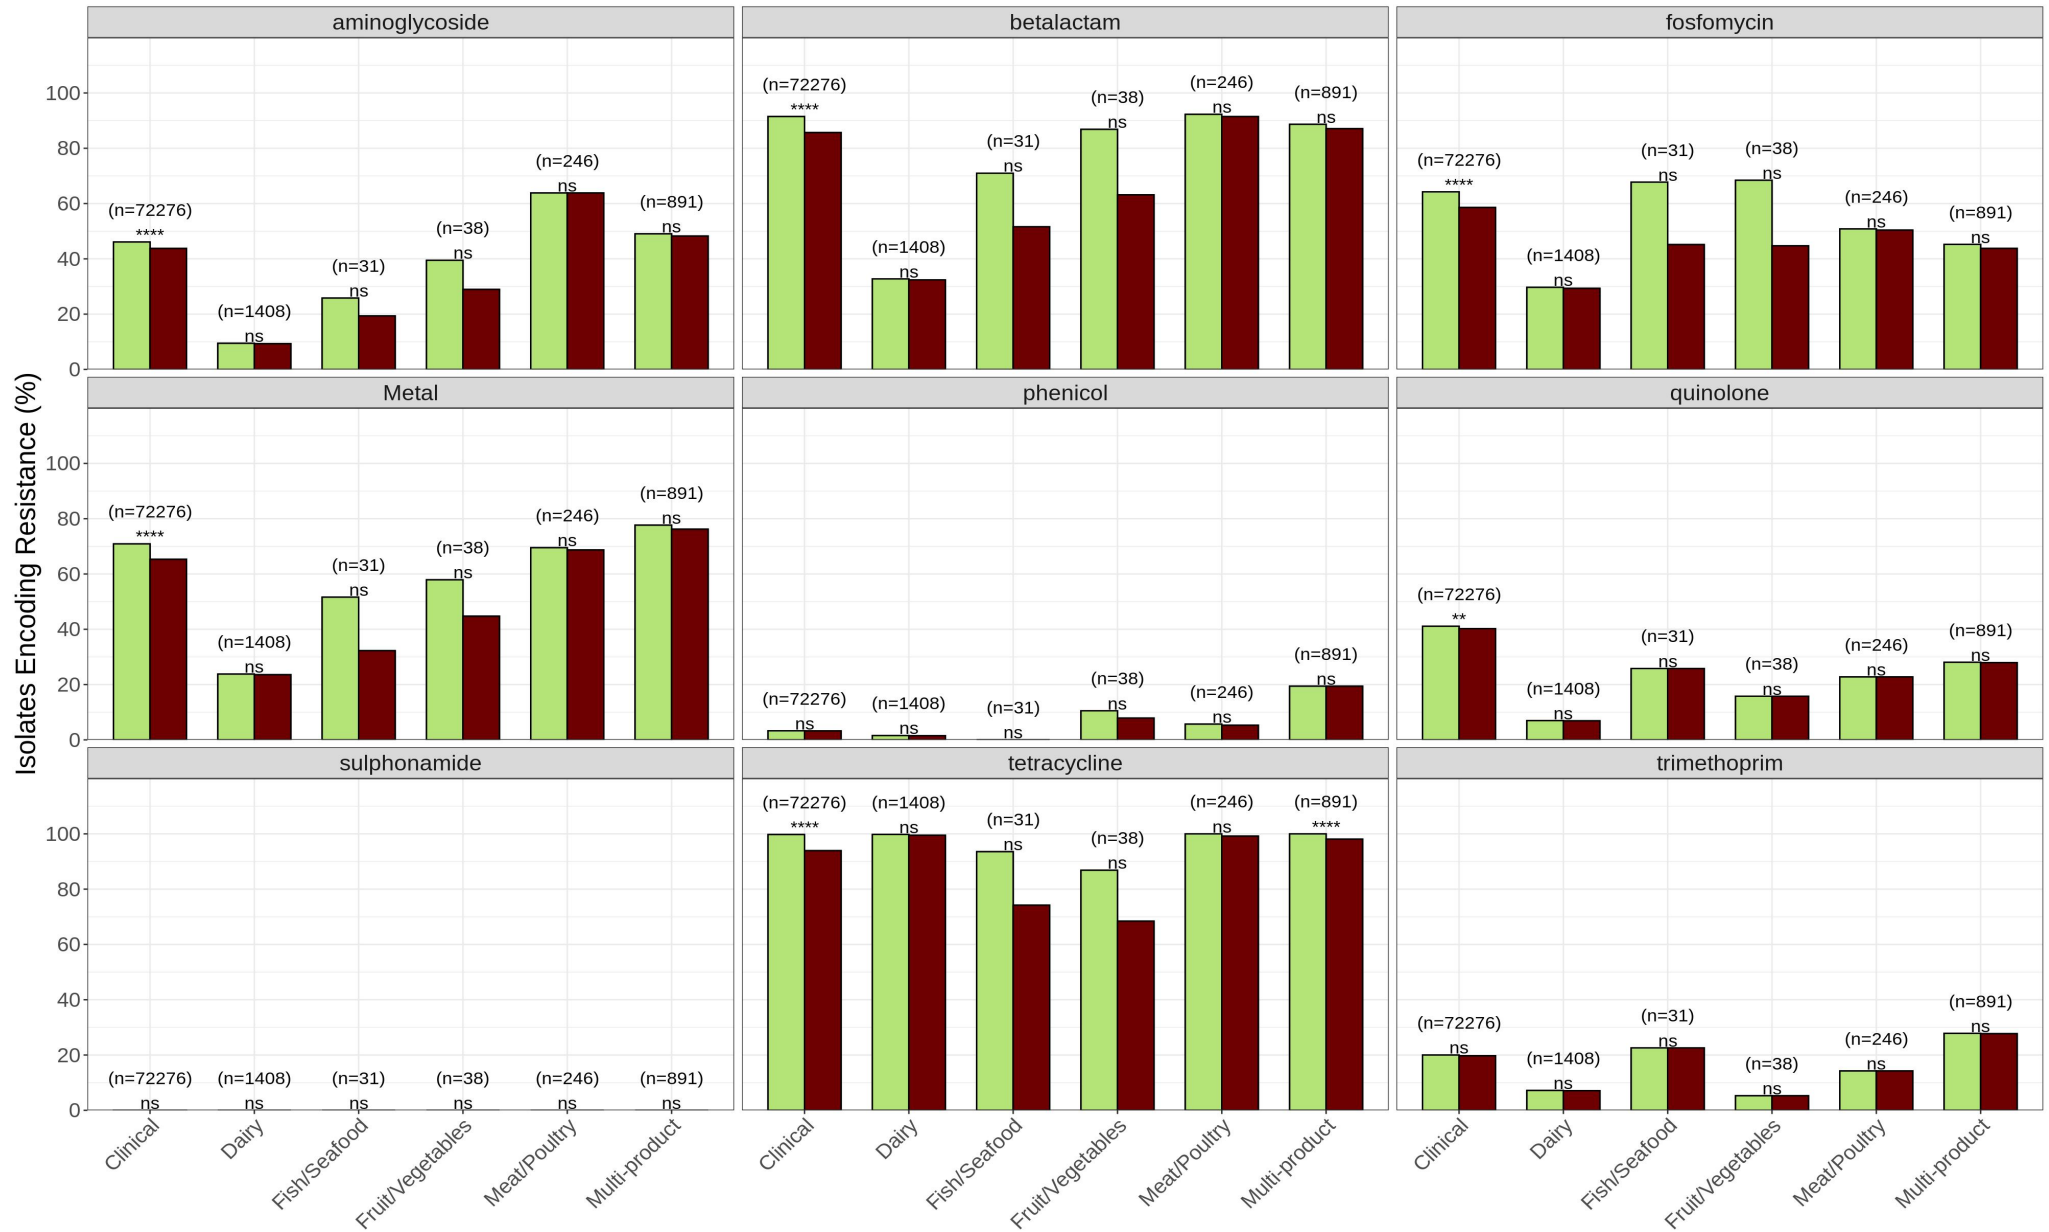

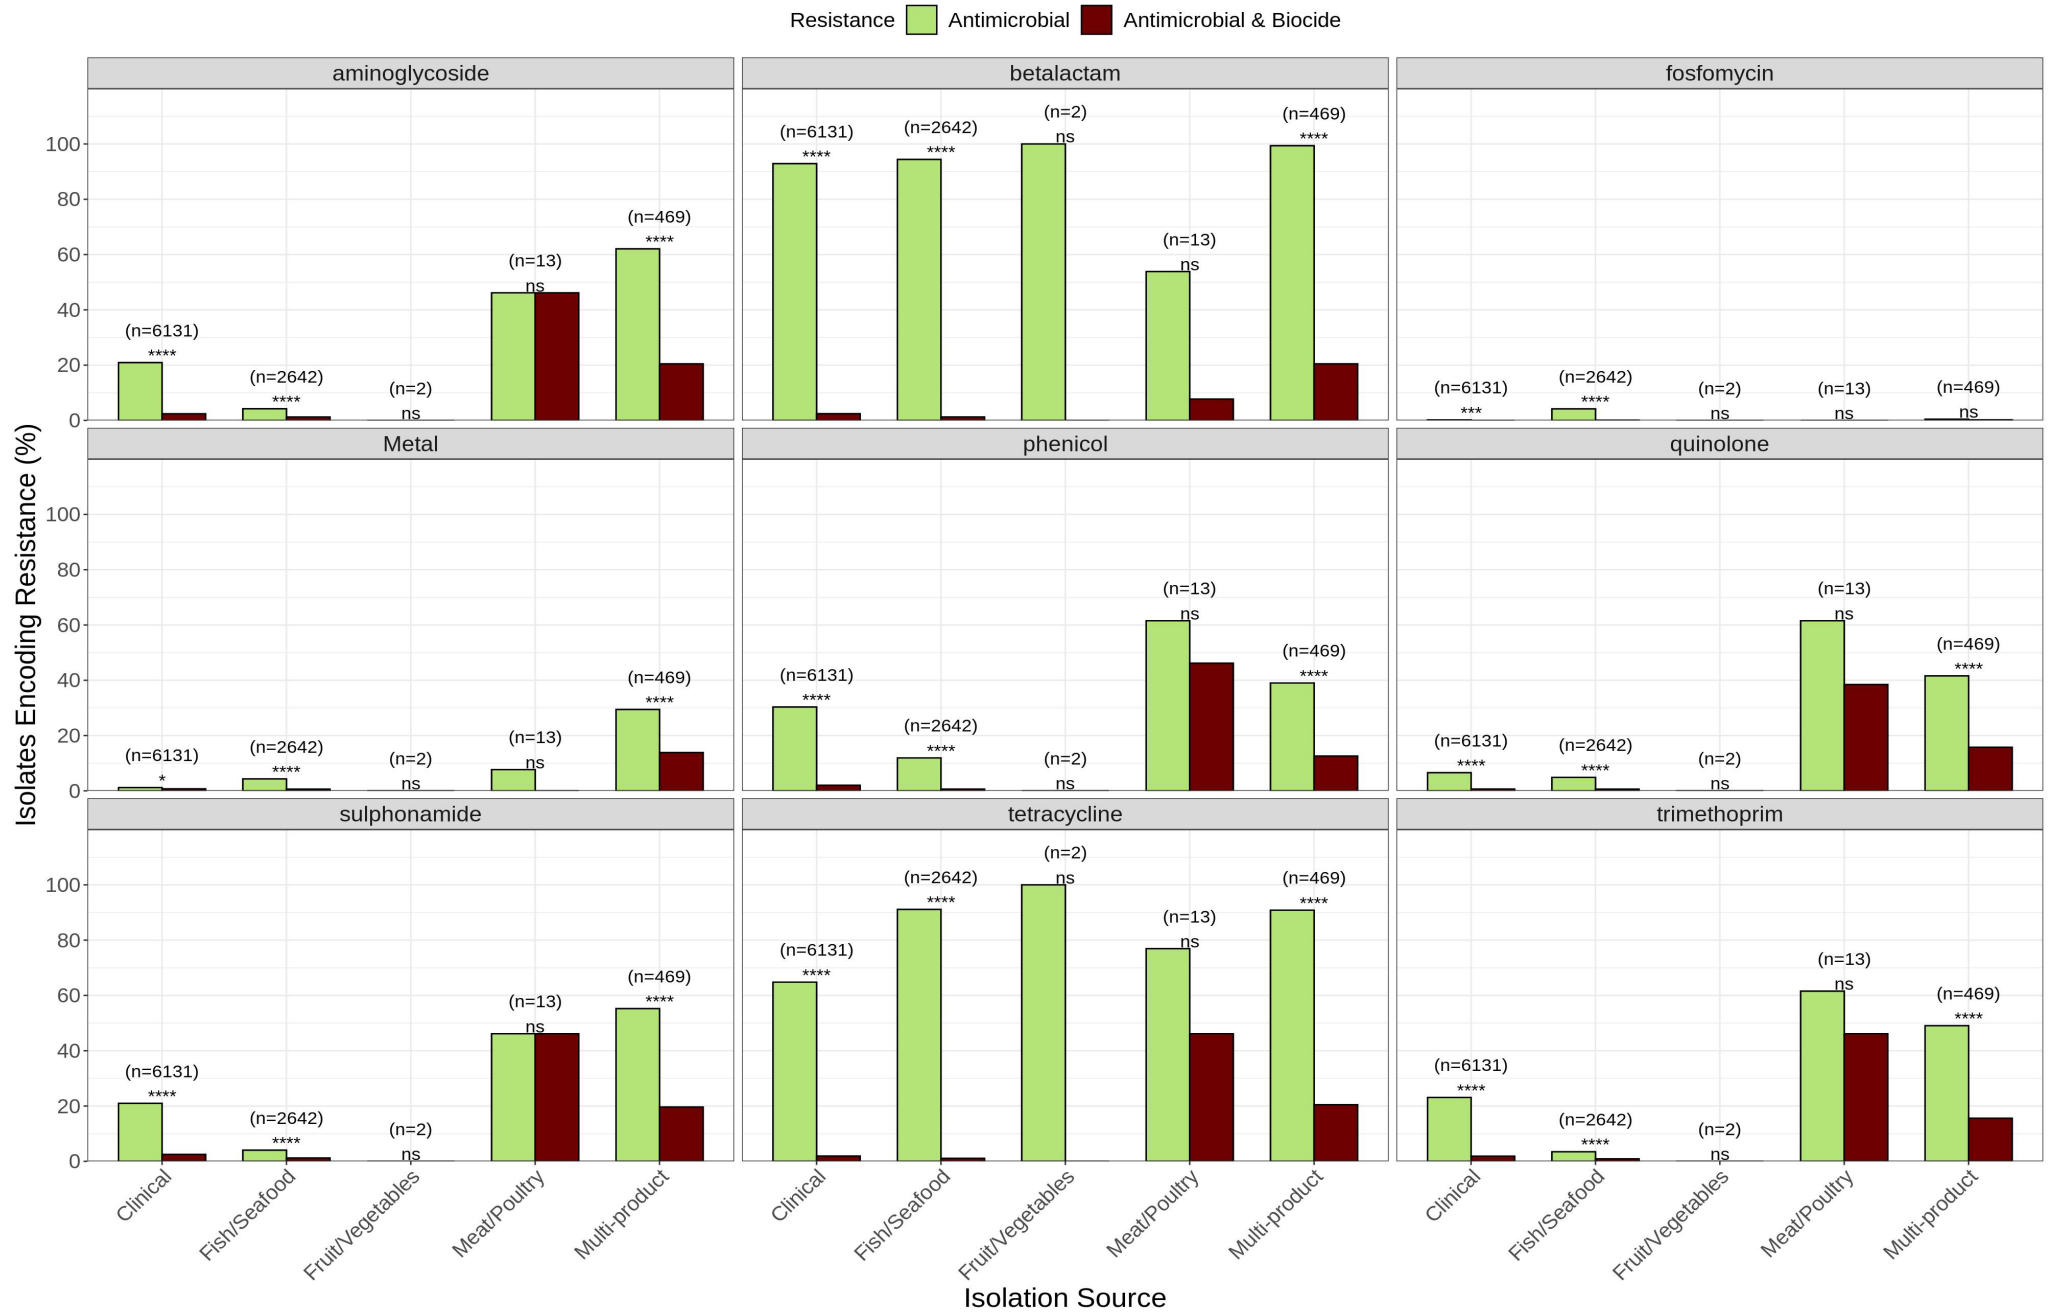

Supplement: s1 [file s1]
