# Supplementary material for: Analysis of Antimicrobial Resistance in Bacterial Pathogens Recovered from Food and Human Sources: Insights from 639,087 Bacterial Whole-Genome Sequences in the NCBI Pathogen Detection Database
Source: MDPI journal article supplement (doi:10.3390/microorganisms12040709), 2024-03-30

## Supplementary File S4

The following pages contain figures for Beta-lactam resistance gene families observed in bacterial species of select genera (title at top left of each page). For each species listed on the y-axis, percentage of isolates from each source (differentiated by colour) encoding each respective Beta-lactam gene-family (top panel headings) is displayed along the x-axis. Sizing of points corresponds to the total number of isolates of that species for which isolation source could be identified (No. of isolates). Metadata files for whole-genome sequence data were downloaded from the NCBI Pathogen Detection database. Datasets were analysed and source categories were assigned based on reported sequence submission information. Data was excluded from analysis where source information was missing or incomplete (see methods). For each gene family displayed, all alleles in the AMRFinderPlus database are included.

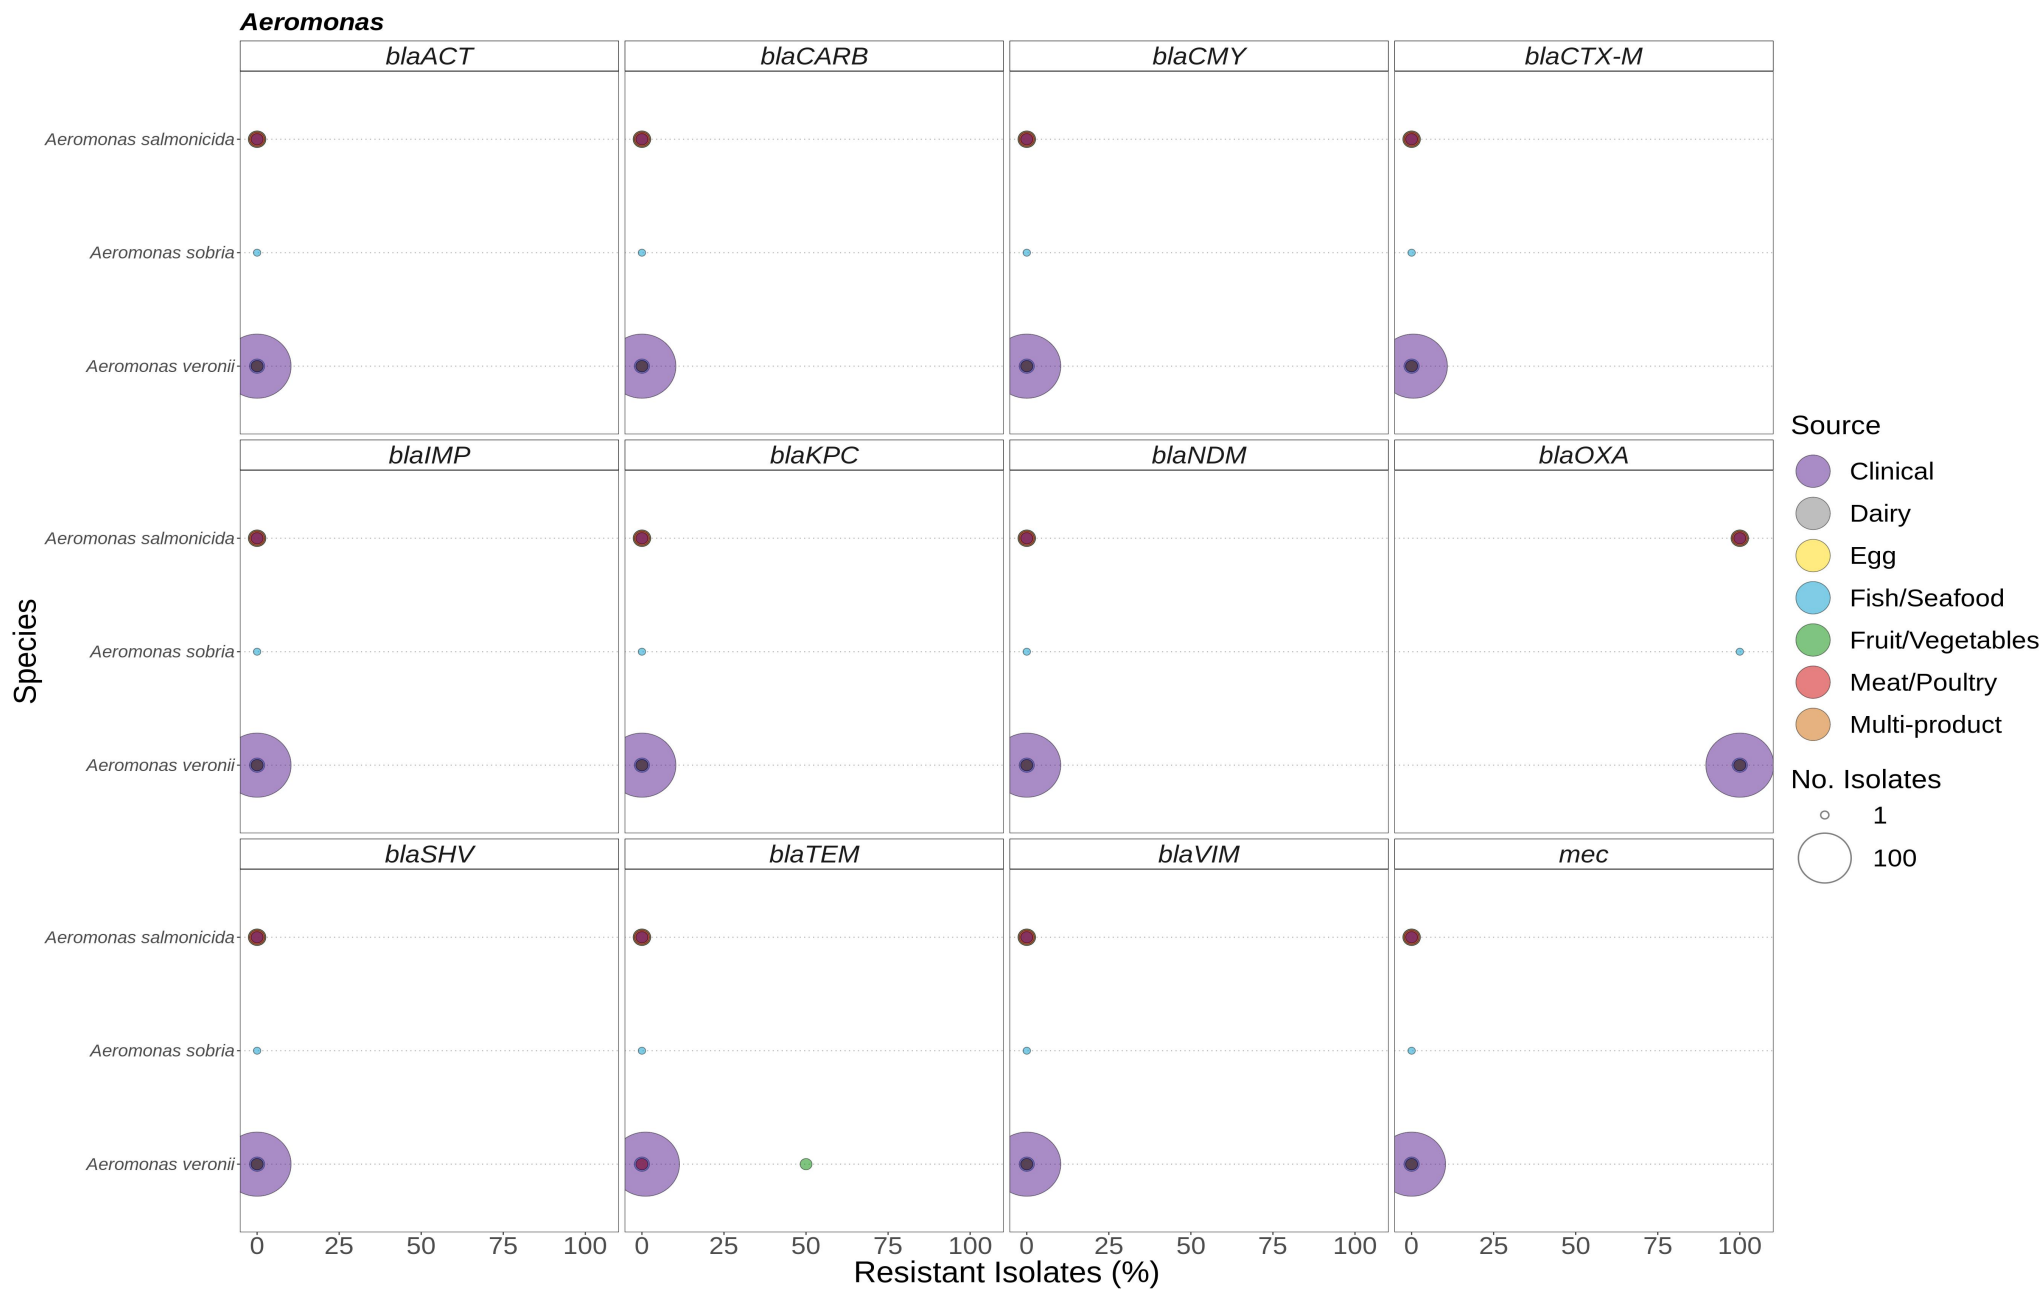

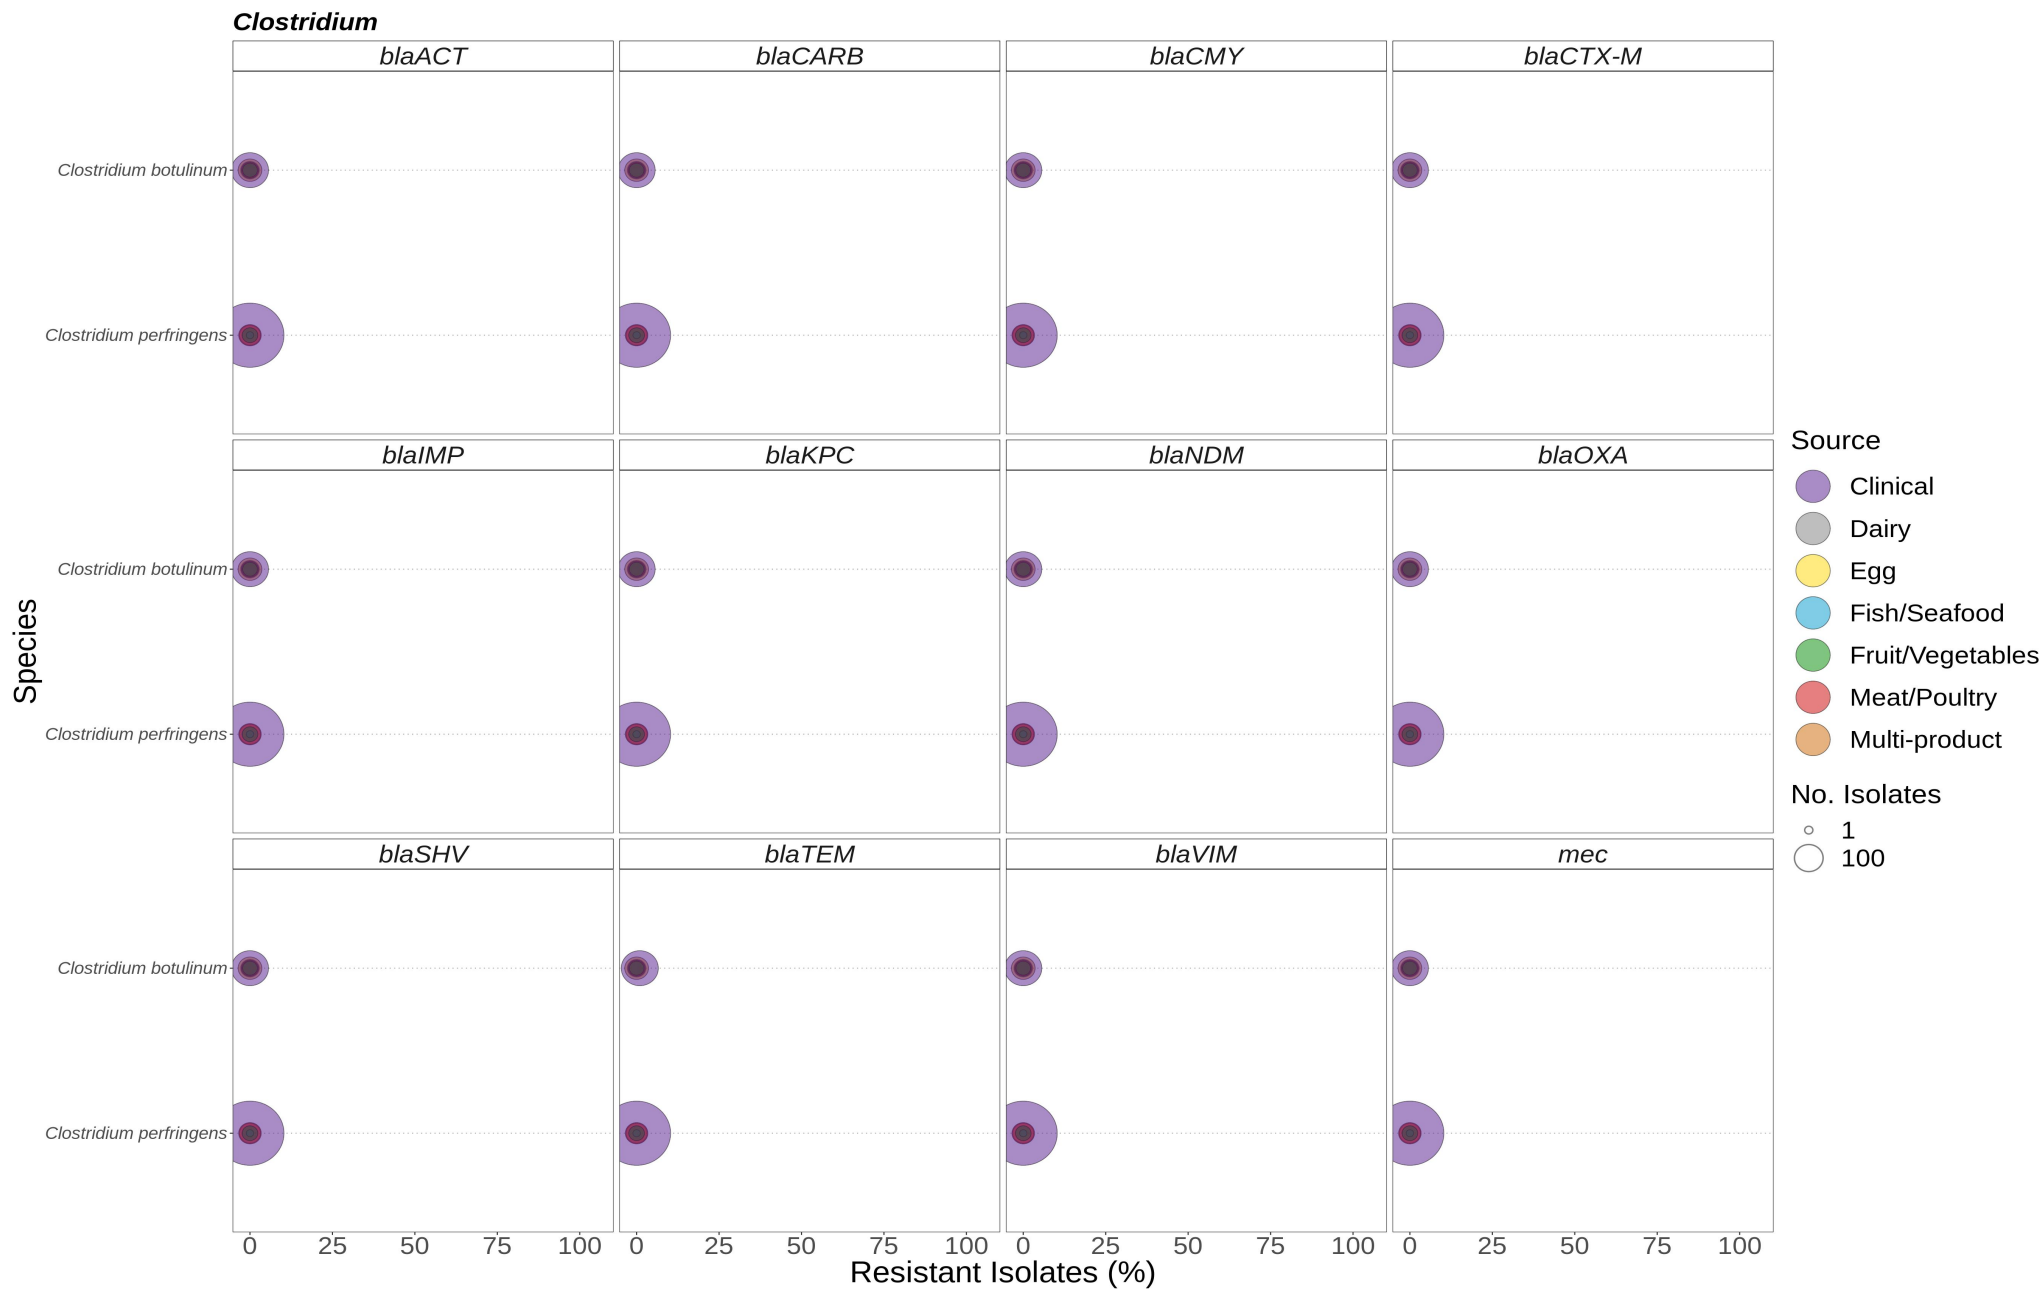

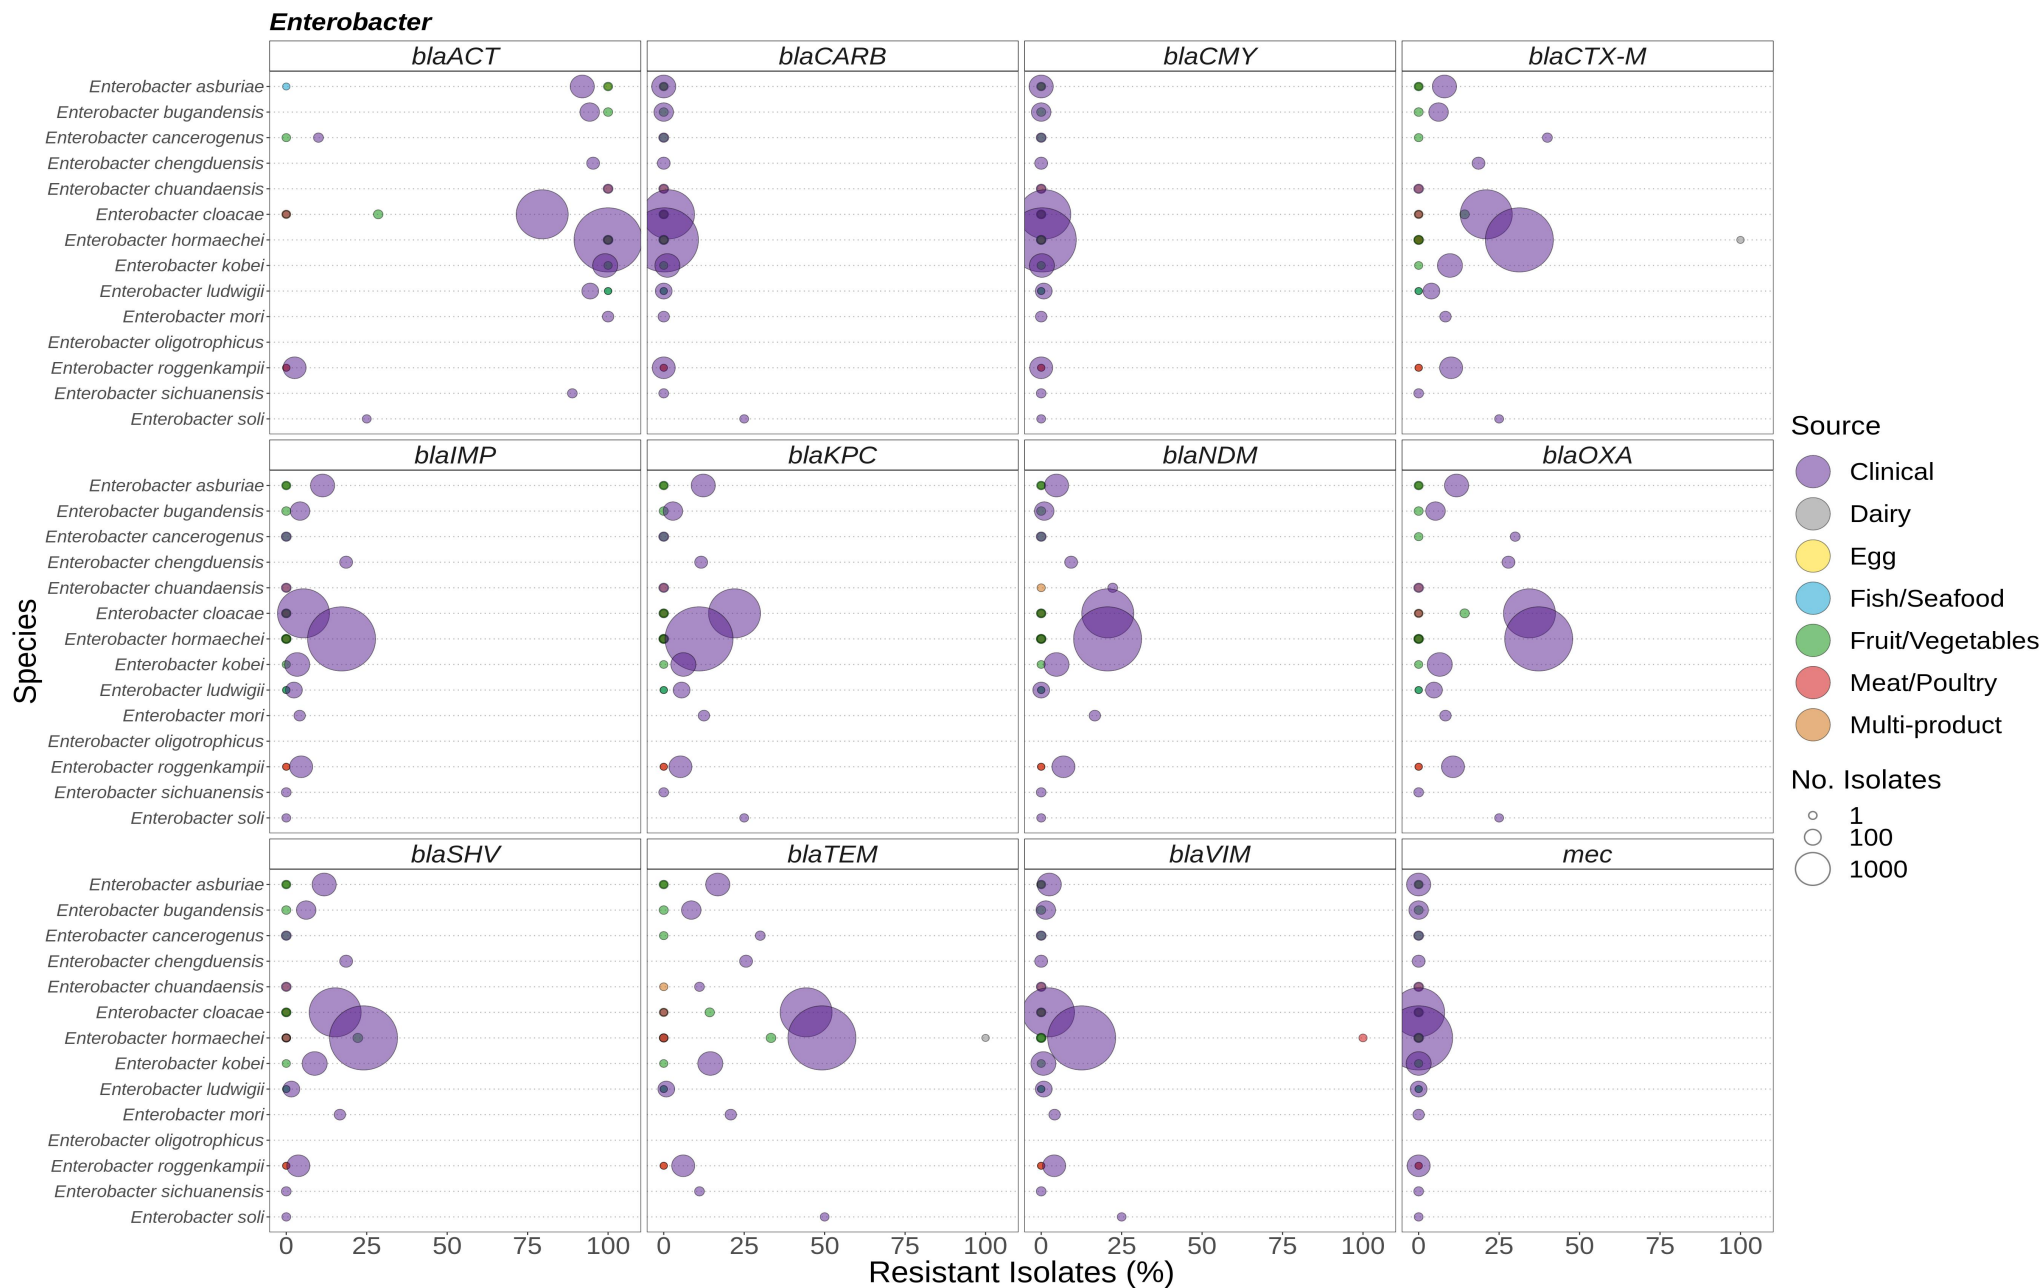



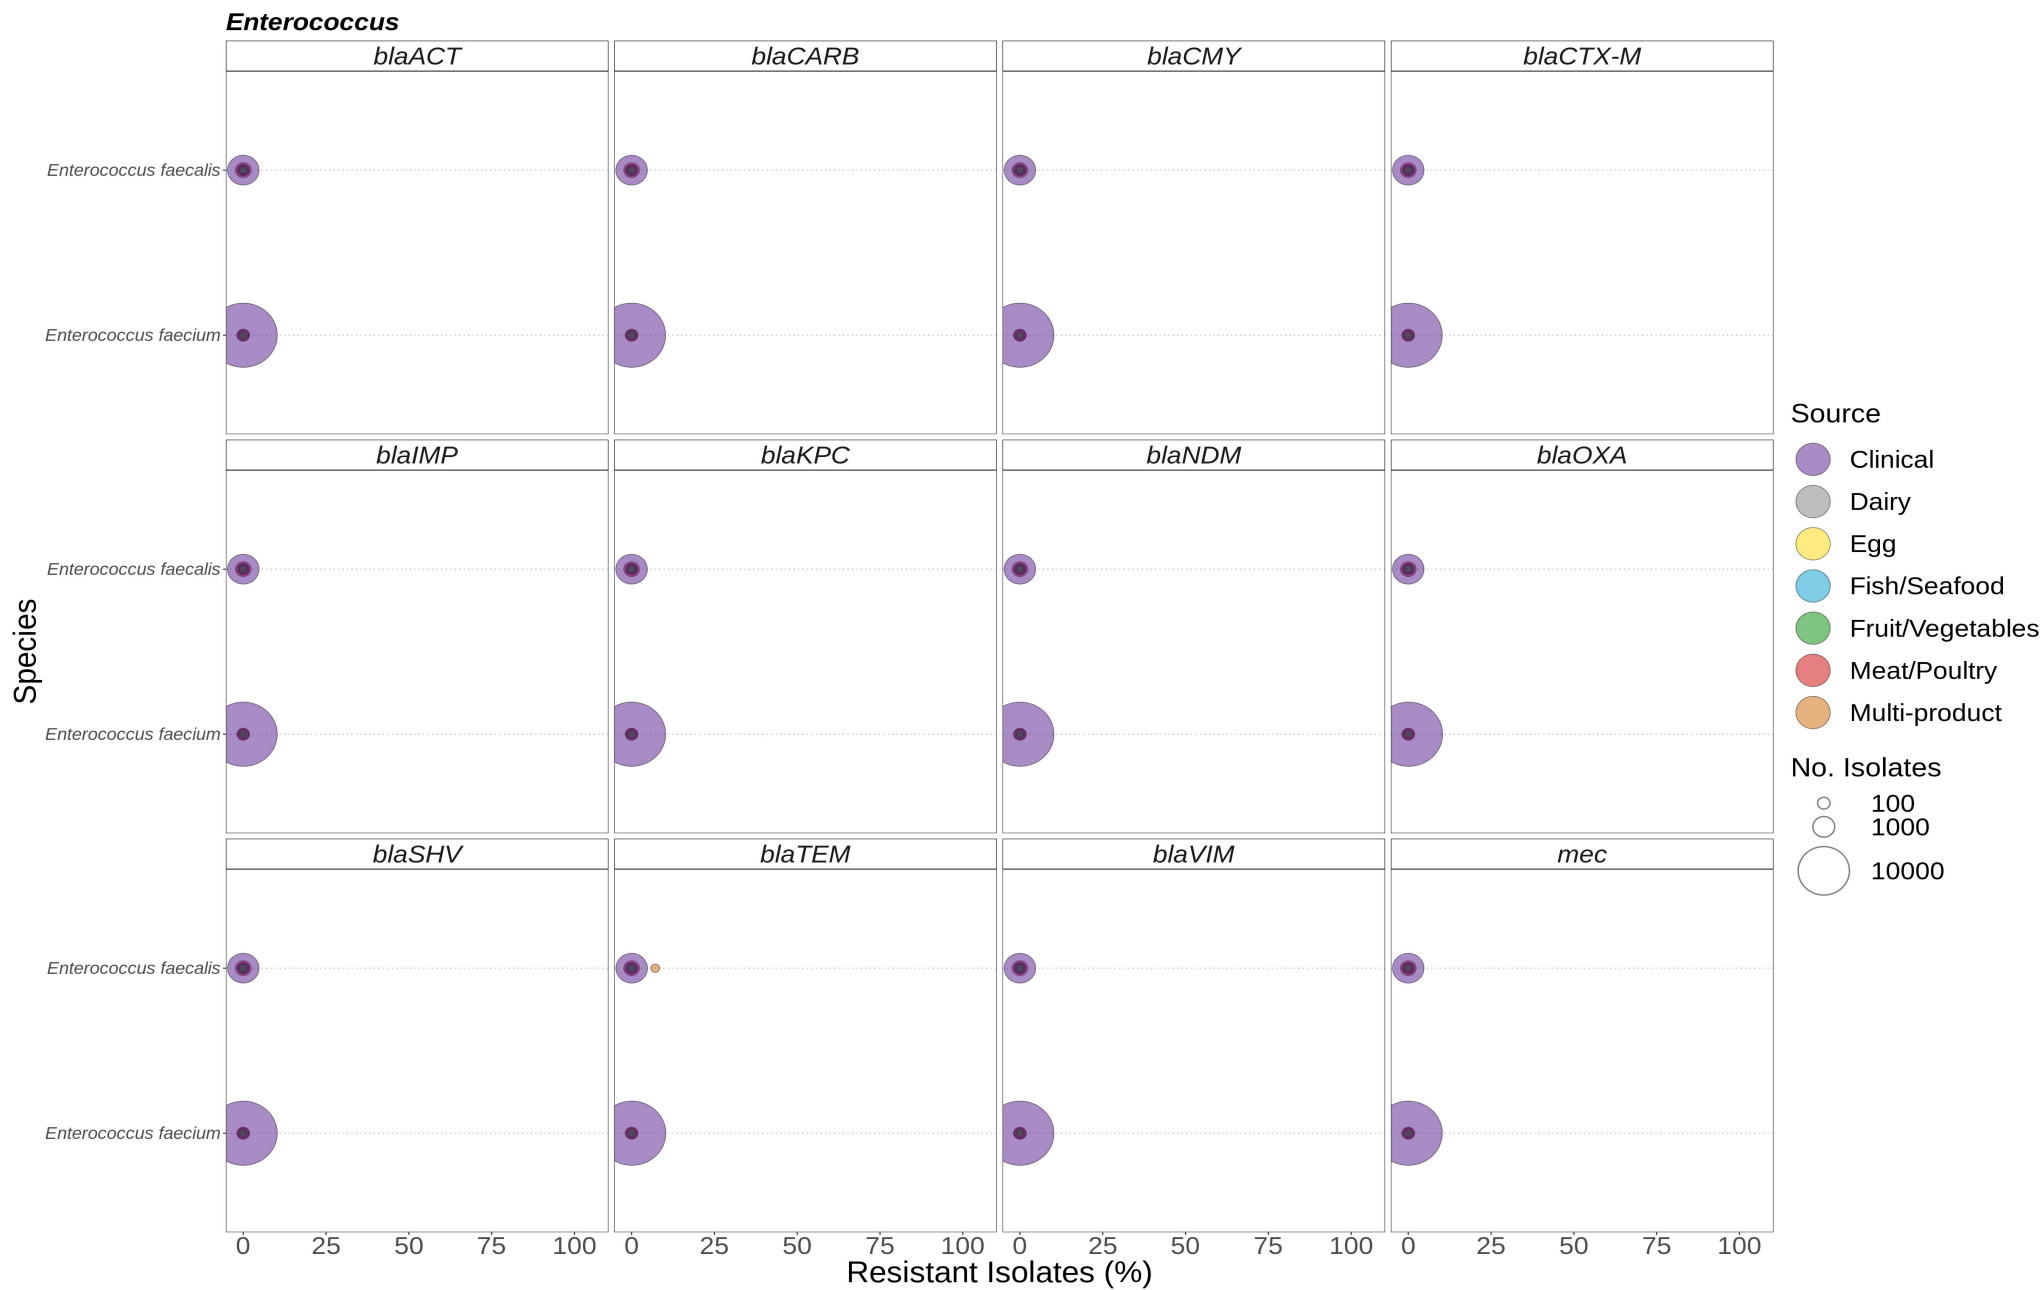

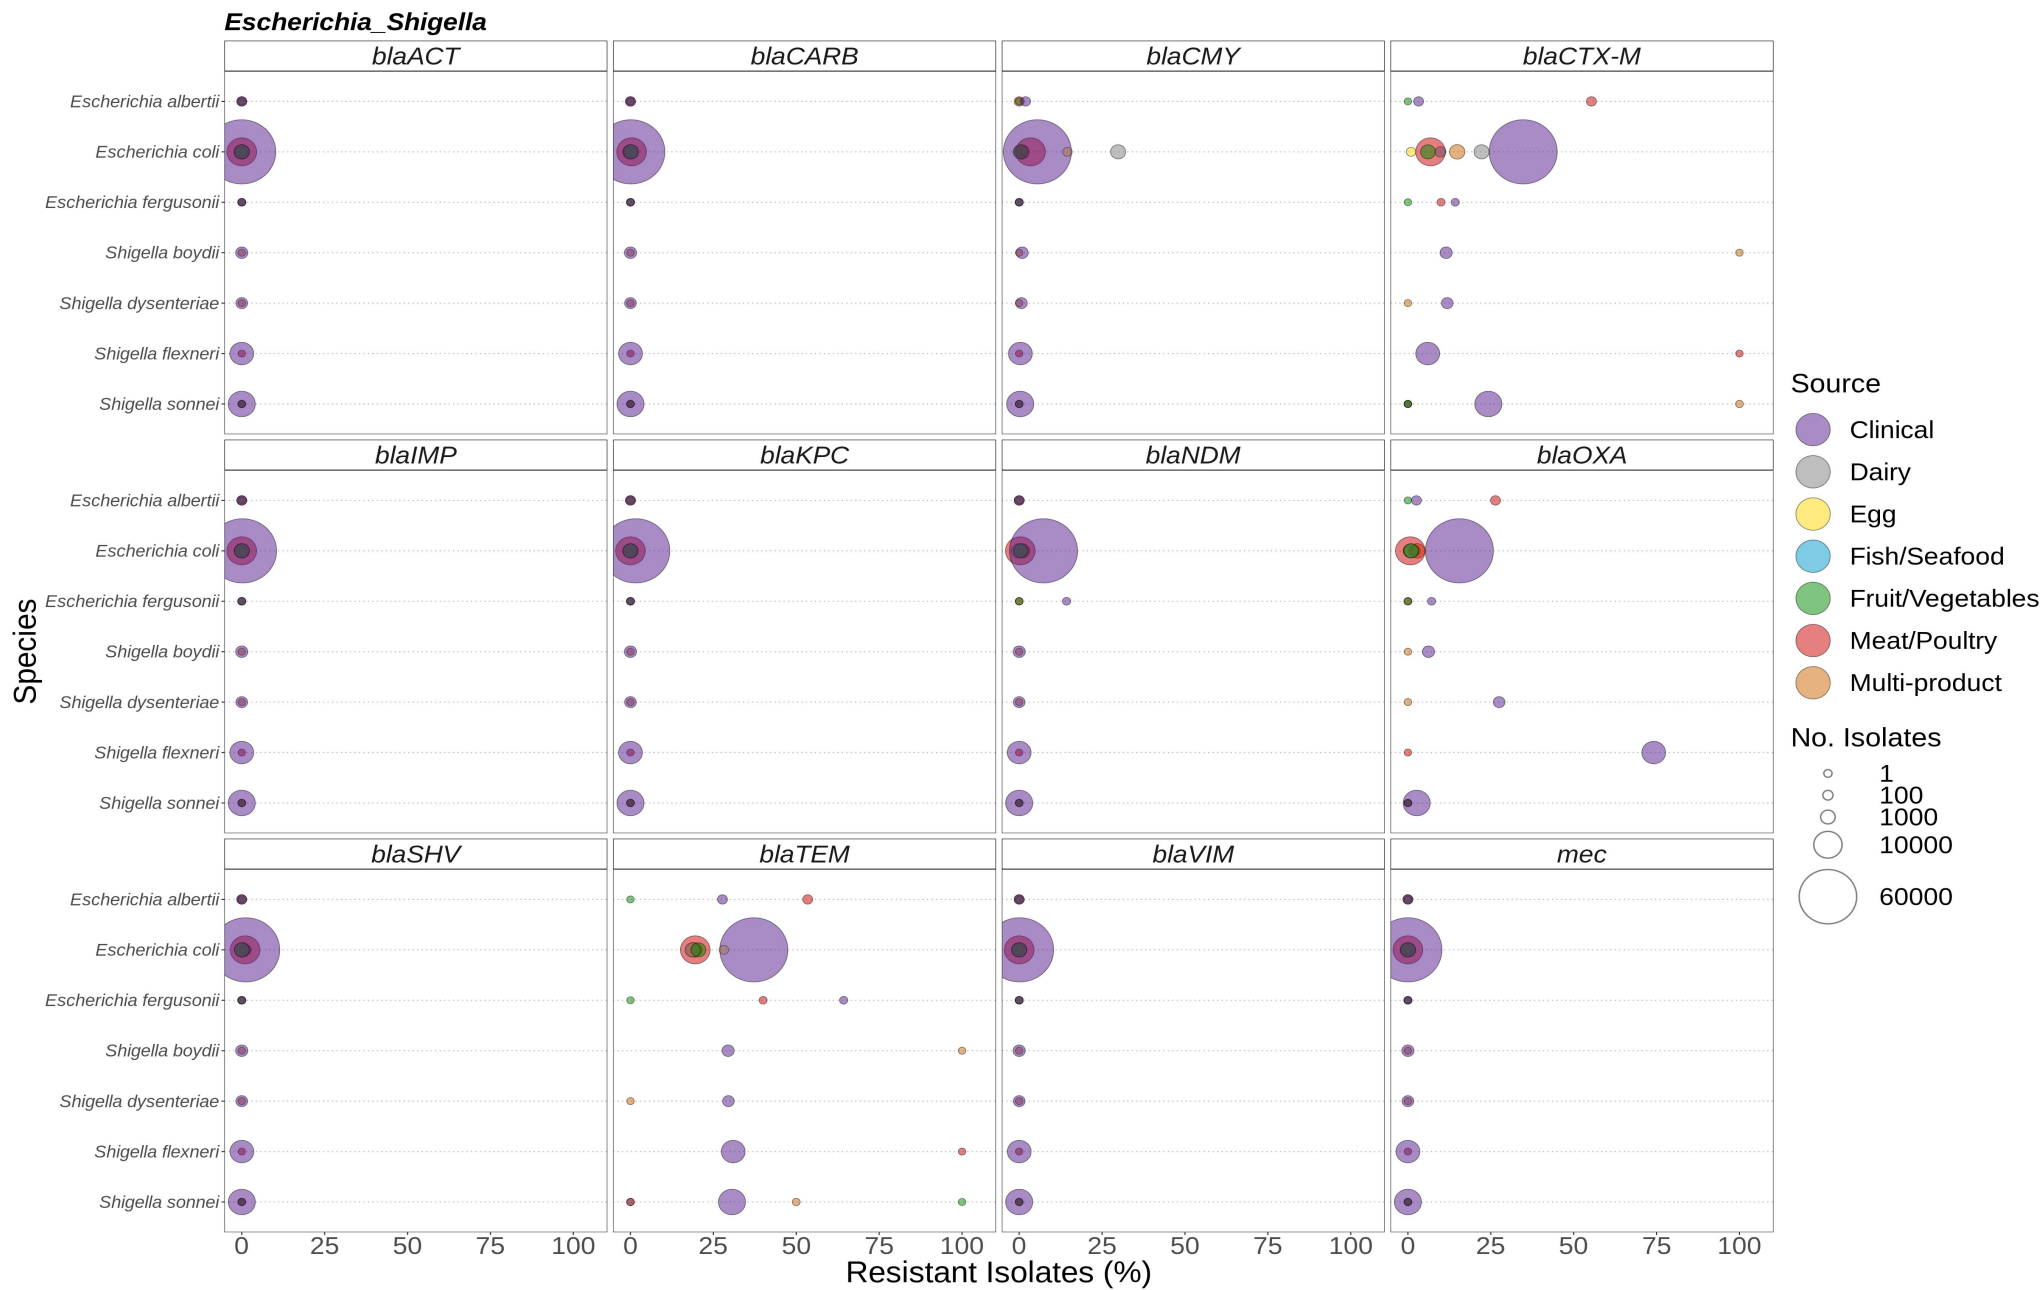

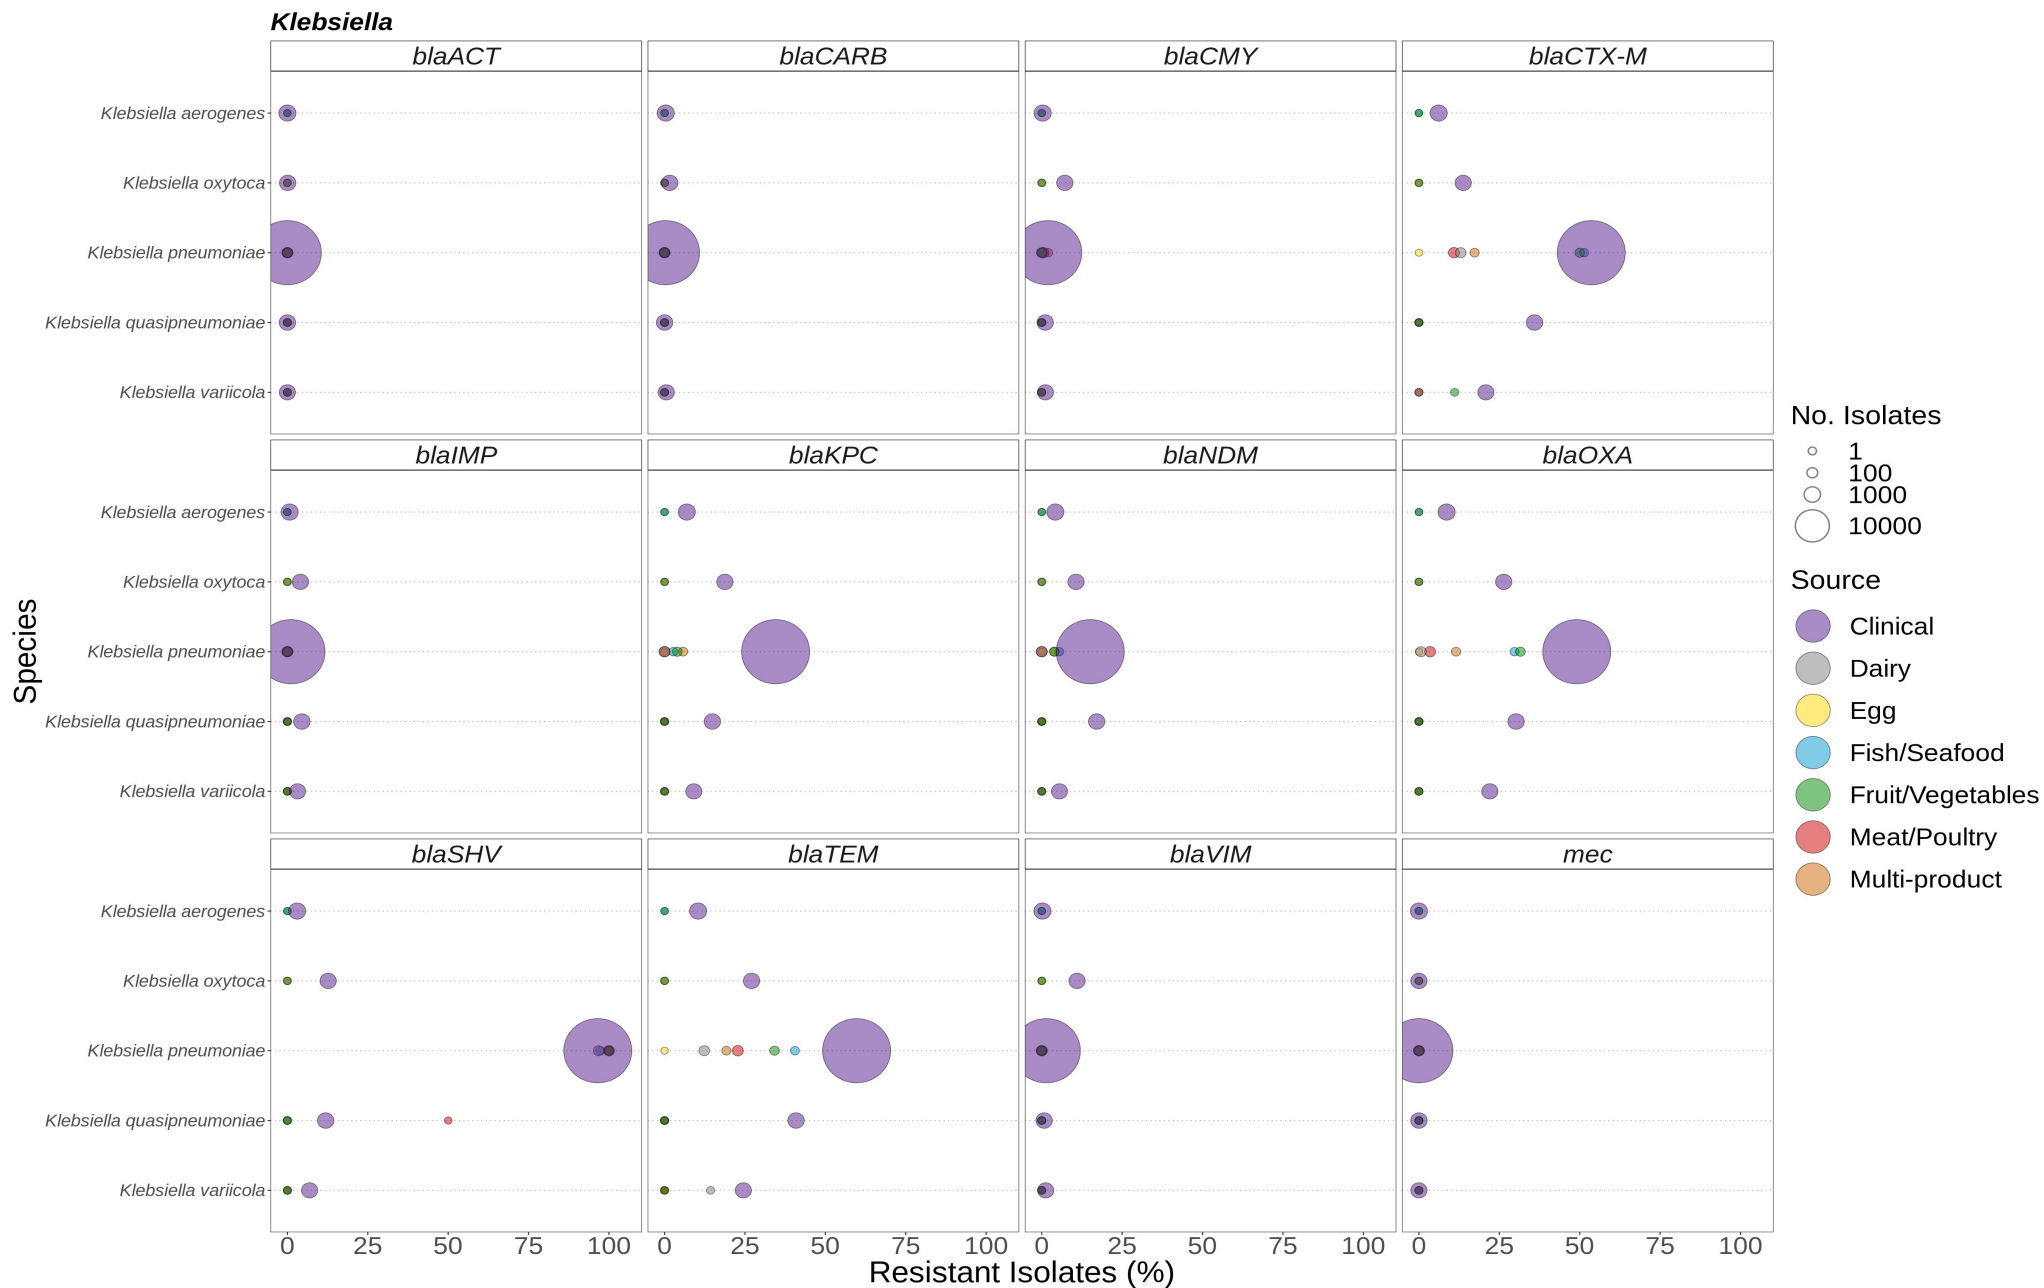

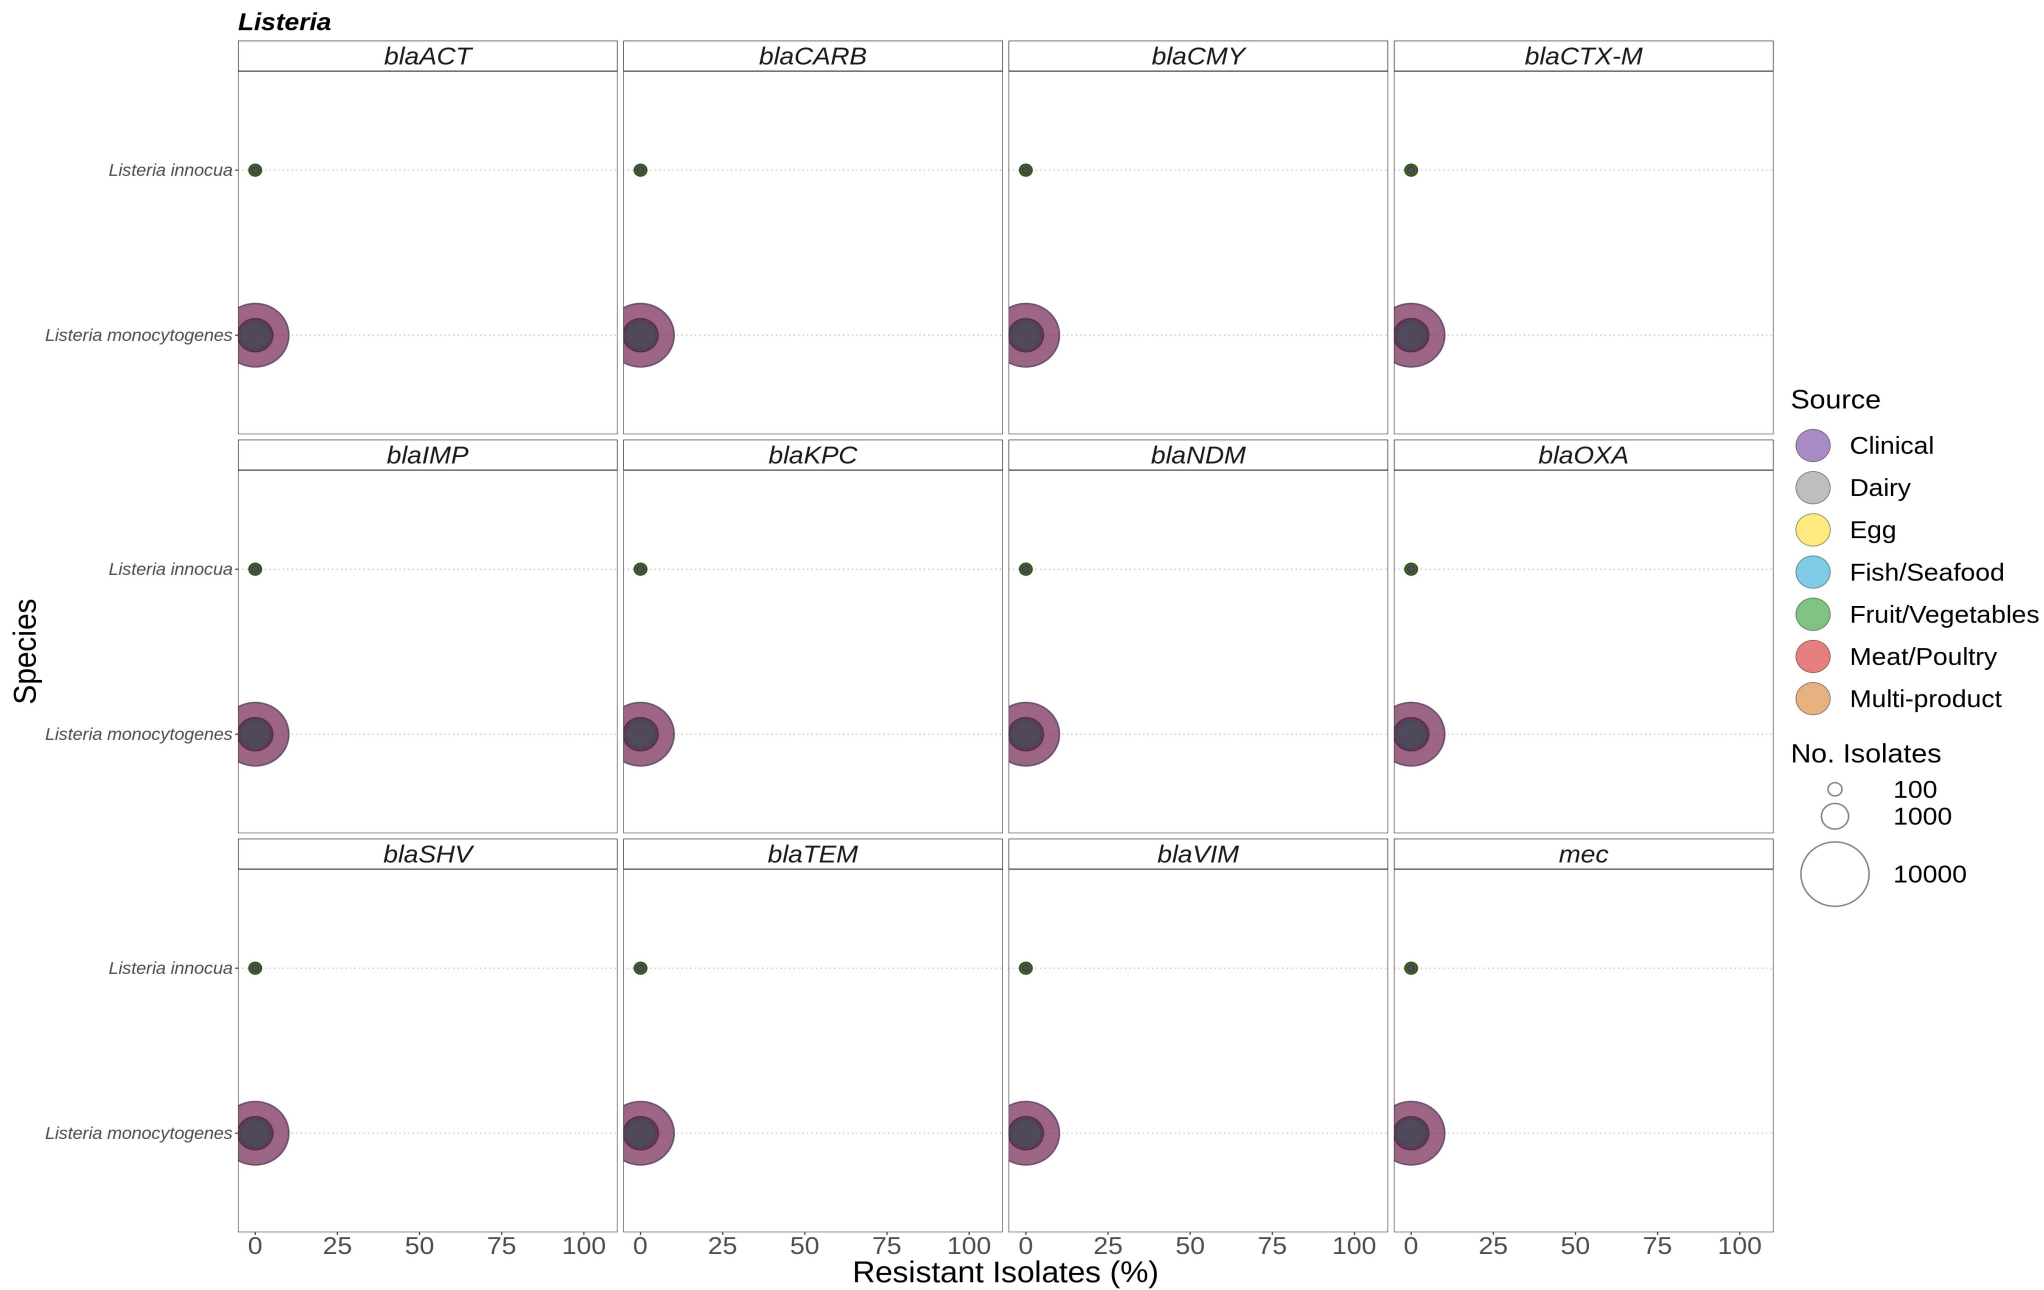

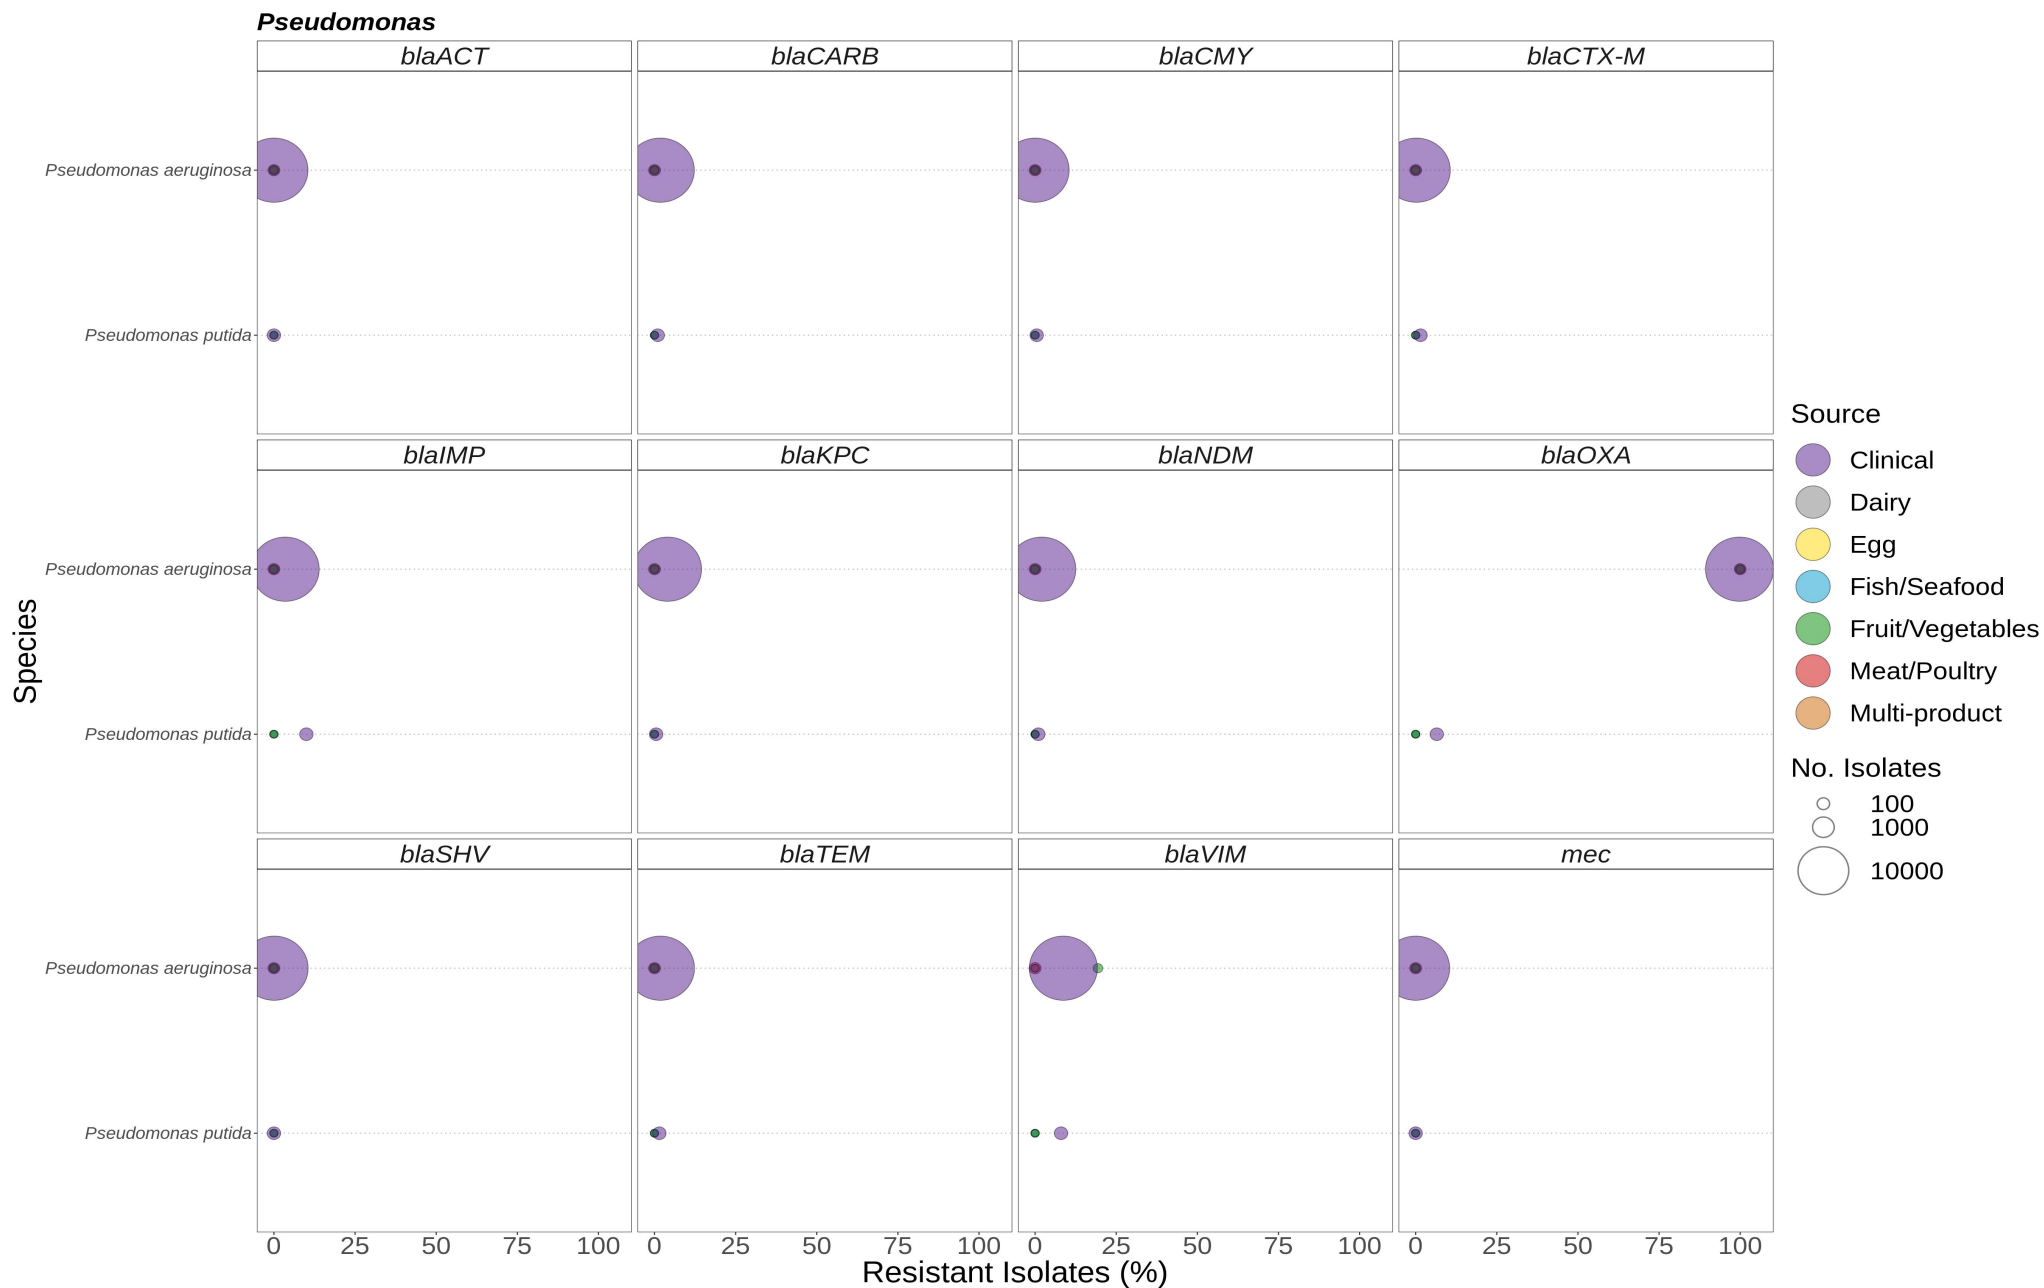

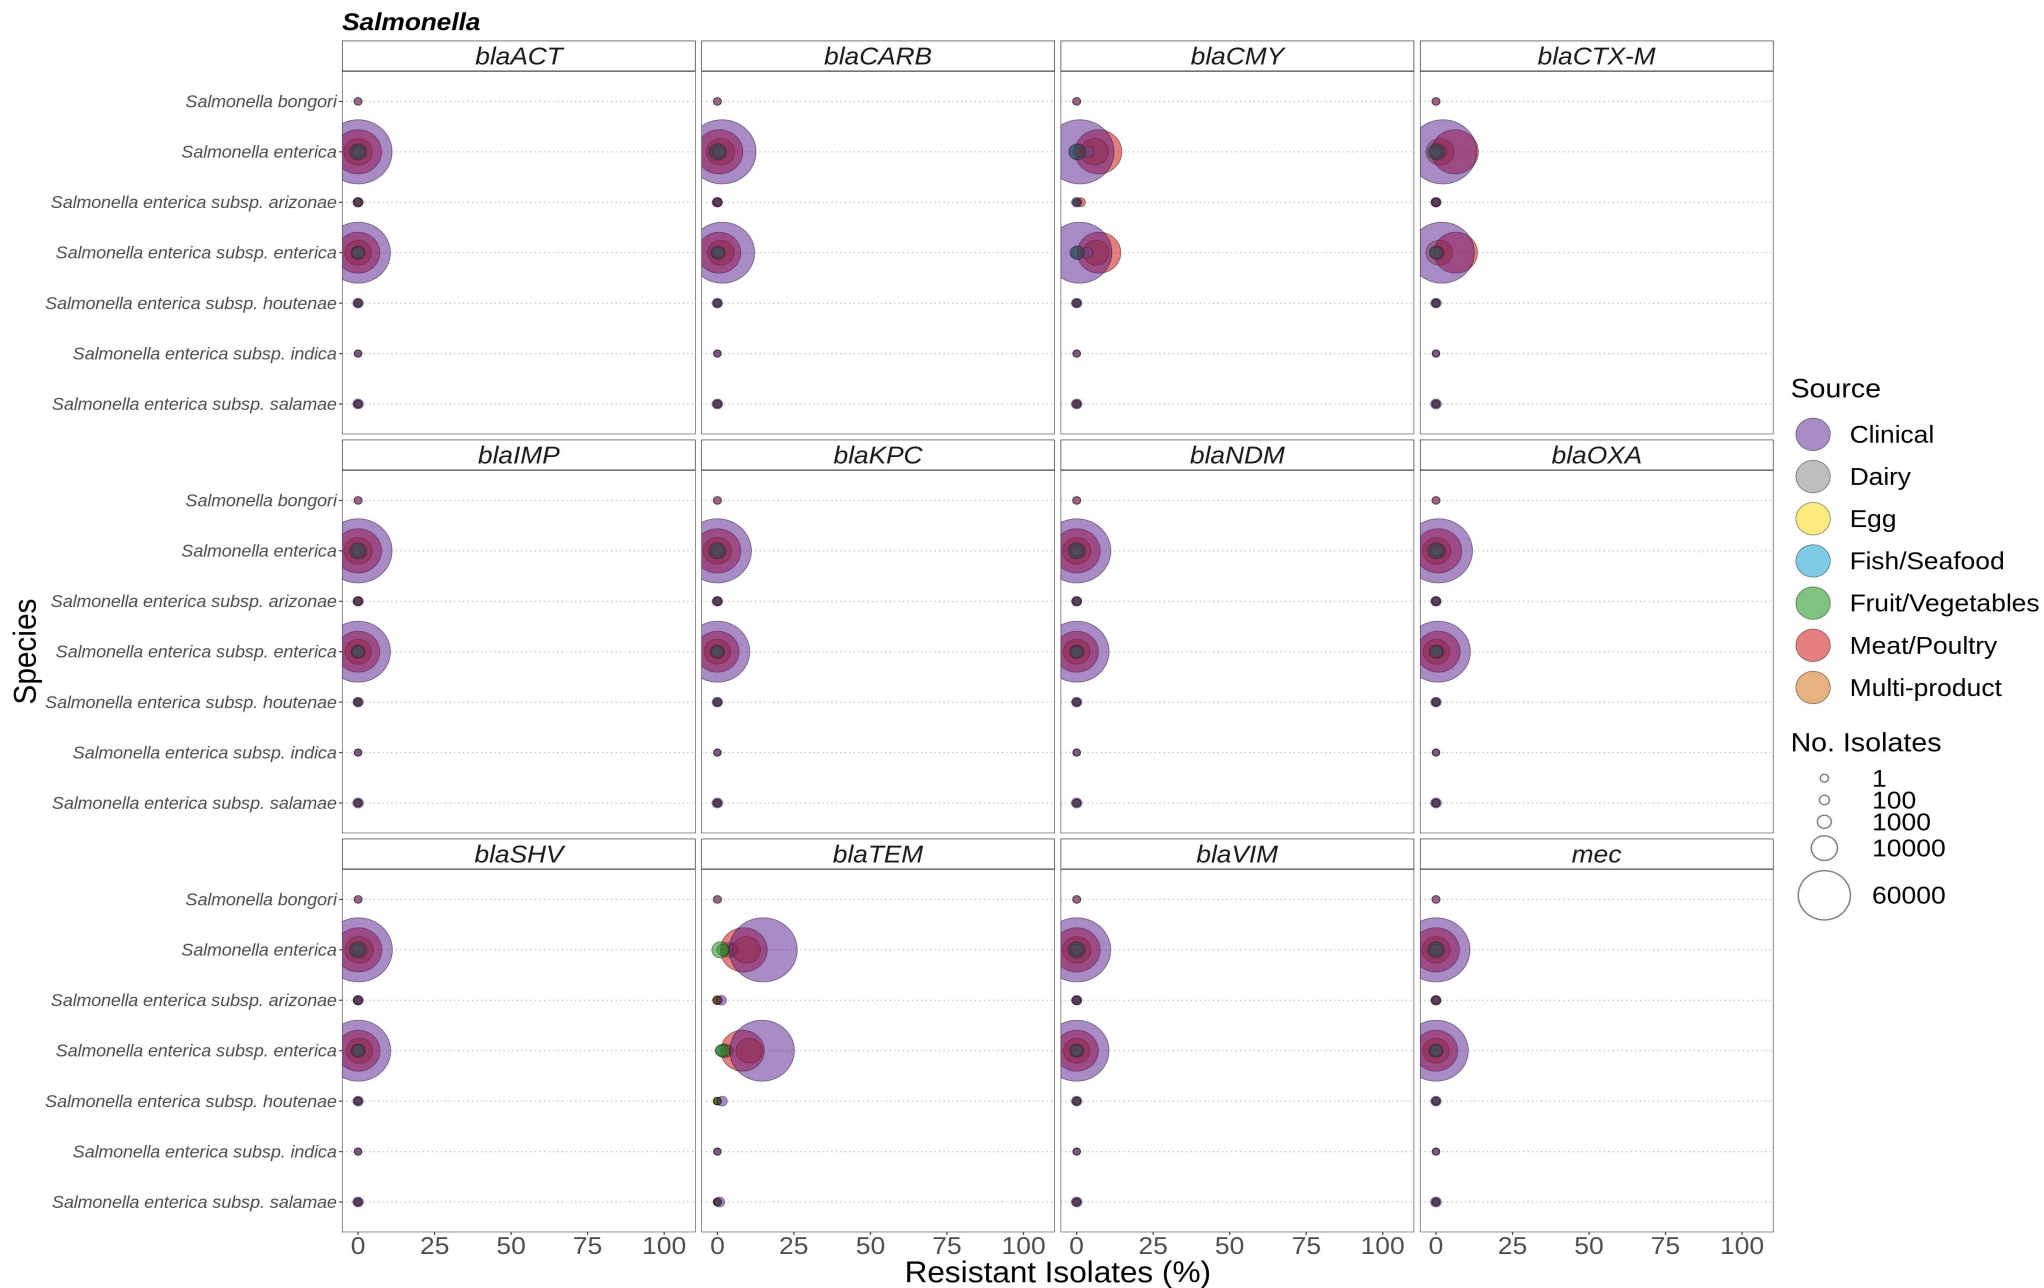

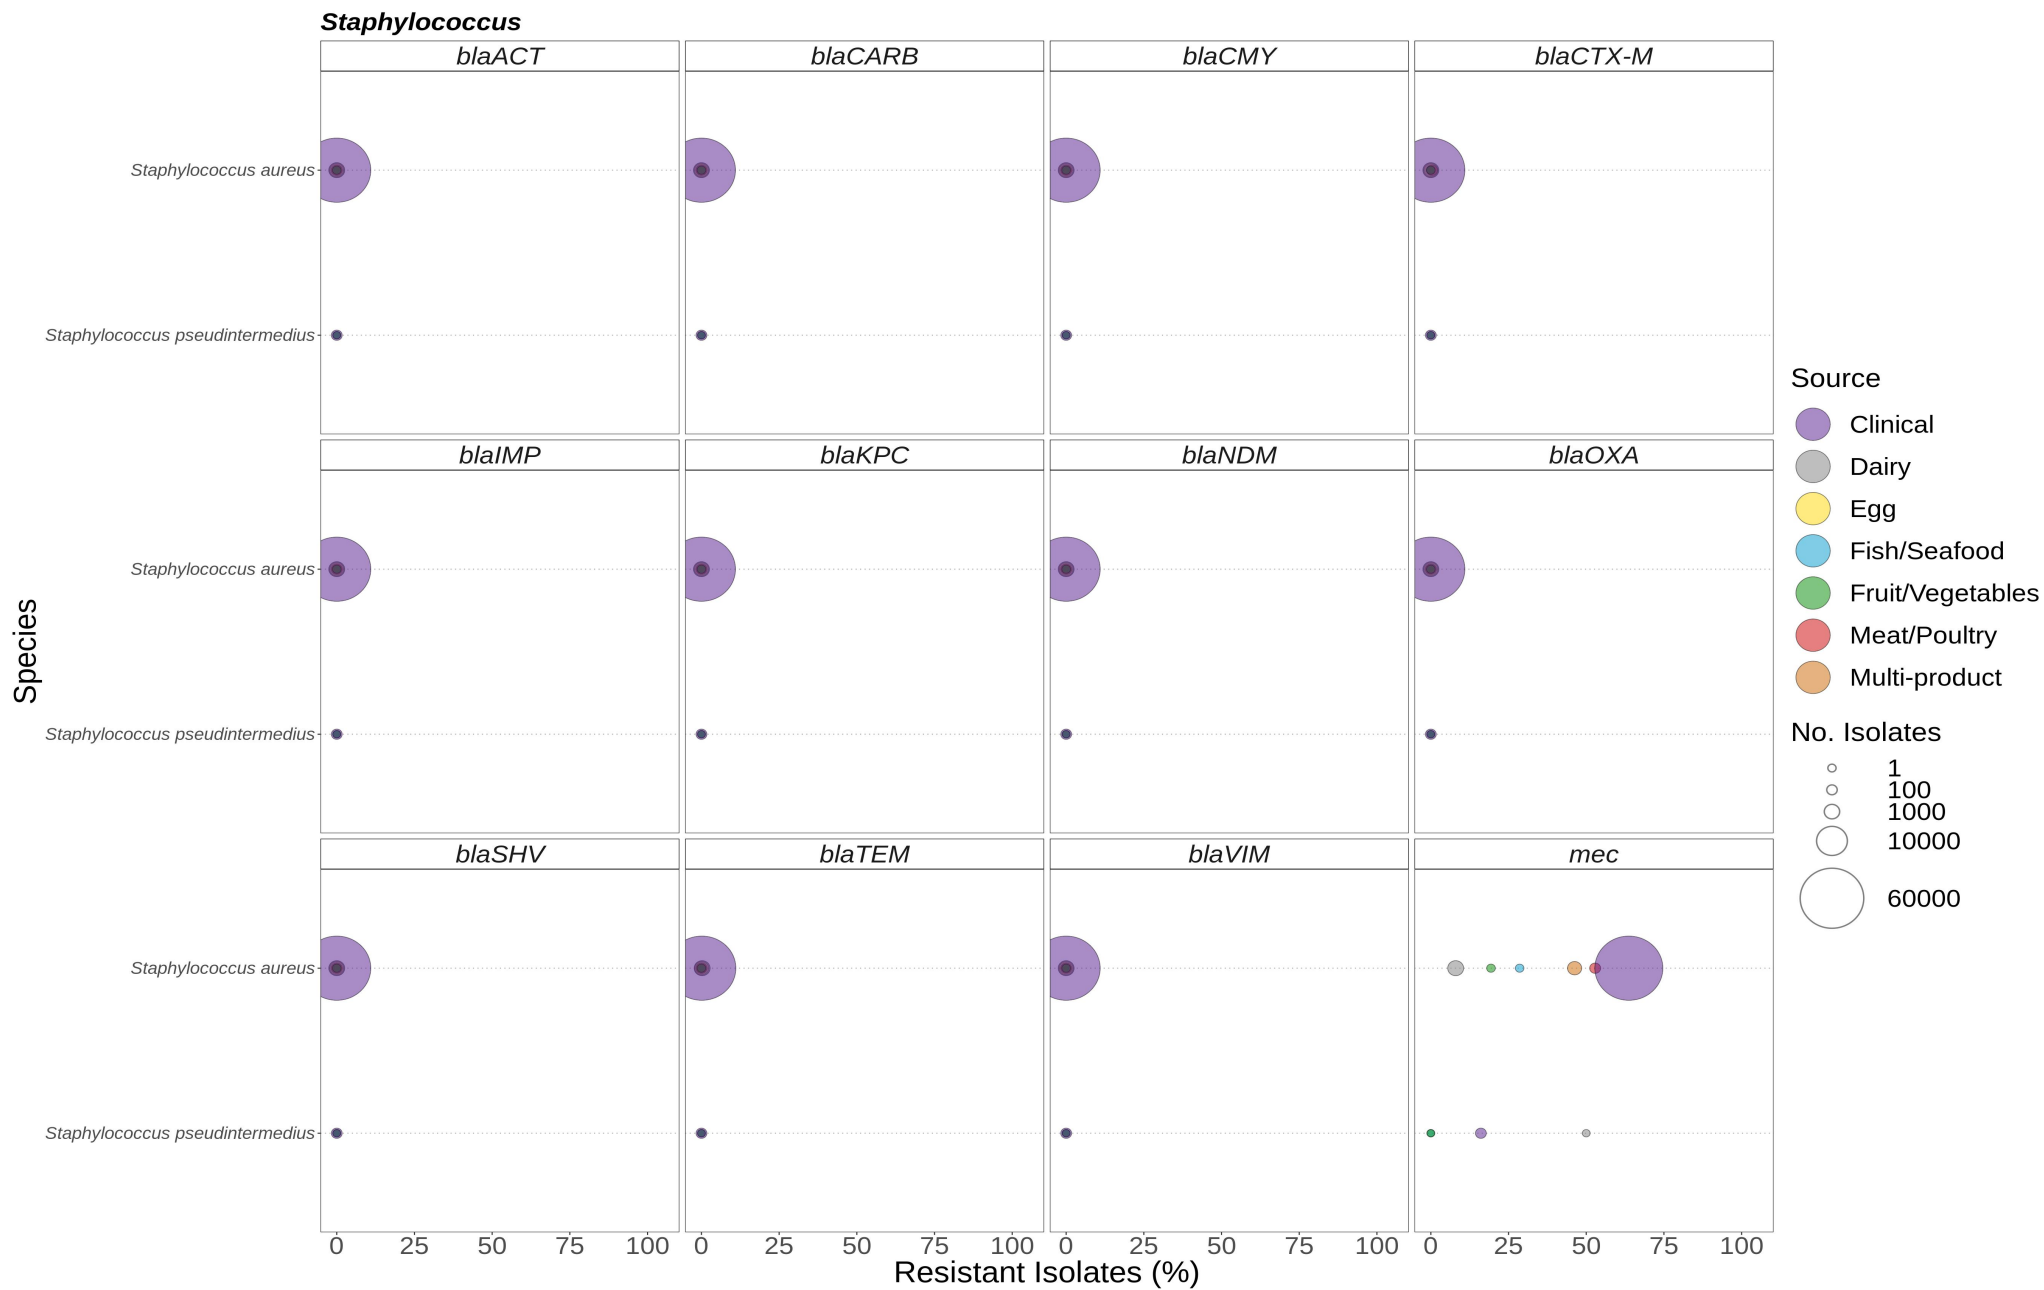

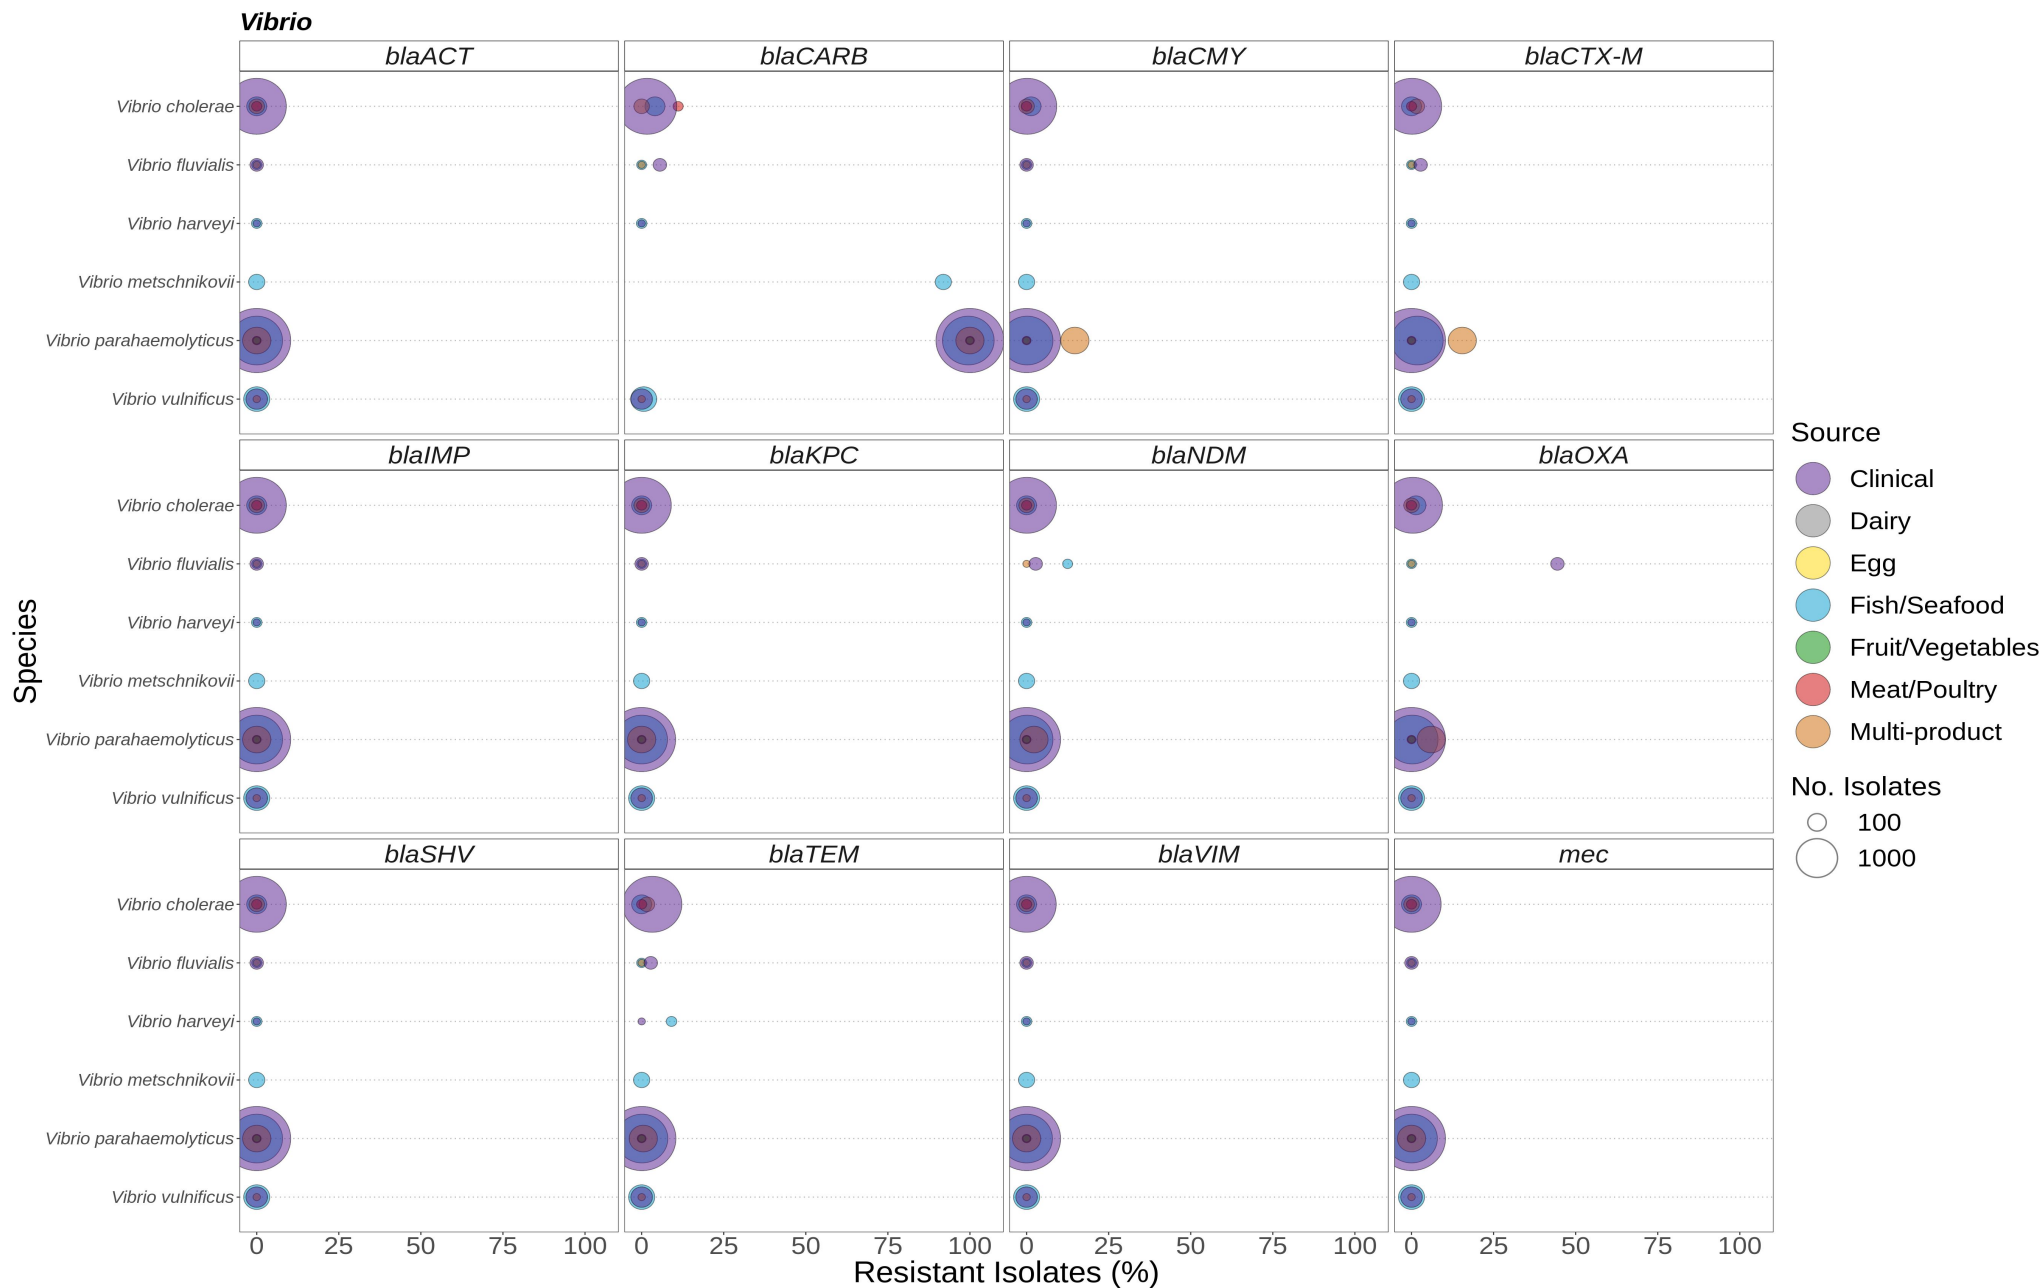

Supplement: s1 [file s1]
