# Supplementary material for: Analysis of Antimicrobial Resistance in Bacterial Pathogens Recovered from Food and Human Sources: Insights from 639,087 Bacterial Whole-Genome Sequences in the NCBI Pathogen Detection Database
Source: MDPI journal article supplement (doi:10.3390/microorganisms12040709), 2024-03-30

## Supplementary File S2

The following pages contain supplementary figures for statistical comparison of resistance between sources for each genus. (A) Heatmaps of statistical analysis comparing proportion of isolates encoding resistance between each isolation source (x- and y- axes) in plot B. Statistical comparison was conducted using pairwise Fisher's exact test for proportions with Benjamini and Hochberg (BH) corrections. For each antimicrobial class (top-panel headings), significance between sources (heatmap axes) is denoted by fill (scale is log10 adjusted p-value) and within boxes: ns = not significant;  $p < 0.05$  \*;  $p < 0.01$  = \*\*;  $p < 0.001$  = \*\*\*;  $p < 0.0001$  = \*\*\*\*. Grey fill indicates very high significance, which is outside the range of the color gradient (varies by plot). (B) Bubbleplot indicates proportion of resistance (x-axis) for each resistance class (y-axis) from food product and clinical sources (differentiated by color). Sizing of points corresponds to the total number of isolates of genus for which isolates were downloaded from the NCBI Pathogen Detection database. Datasets were analysed and source categories were assigned based on reported sequence submission information. Data was excluded from analysis where source information was missing or incomplete. Quinolone class includes mobile genes (e.g. qnrS) and chromosomal point mutations (gyrA, parE, parC) reported for some genera.

# Acinetobacter

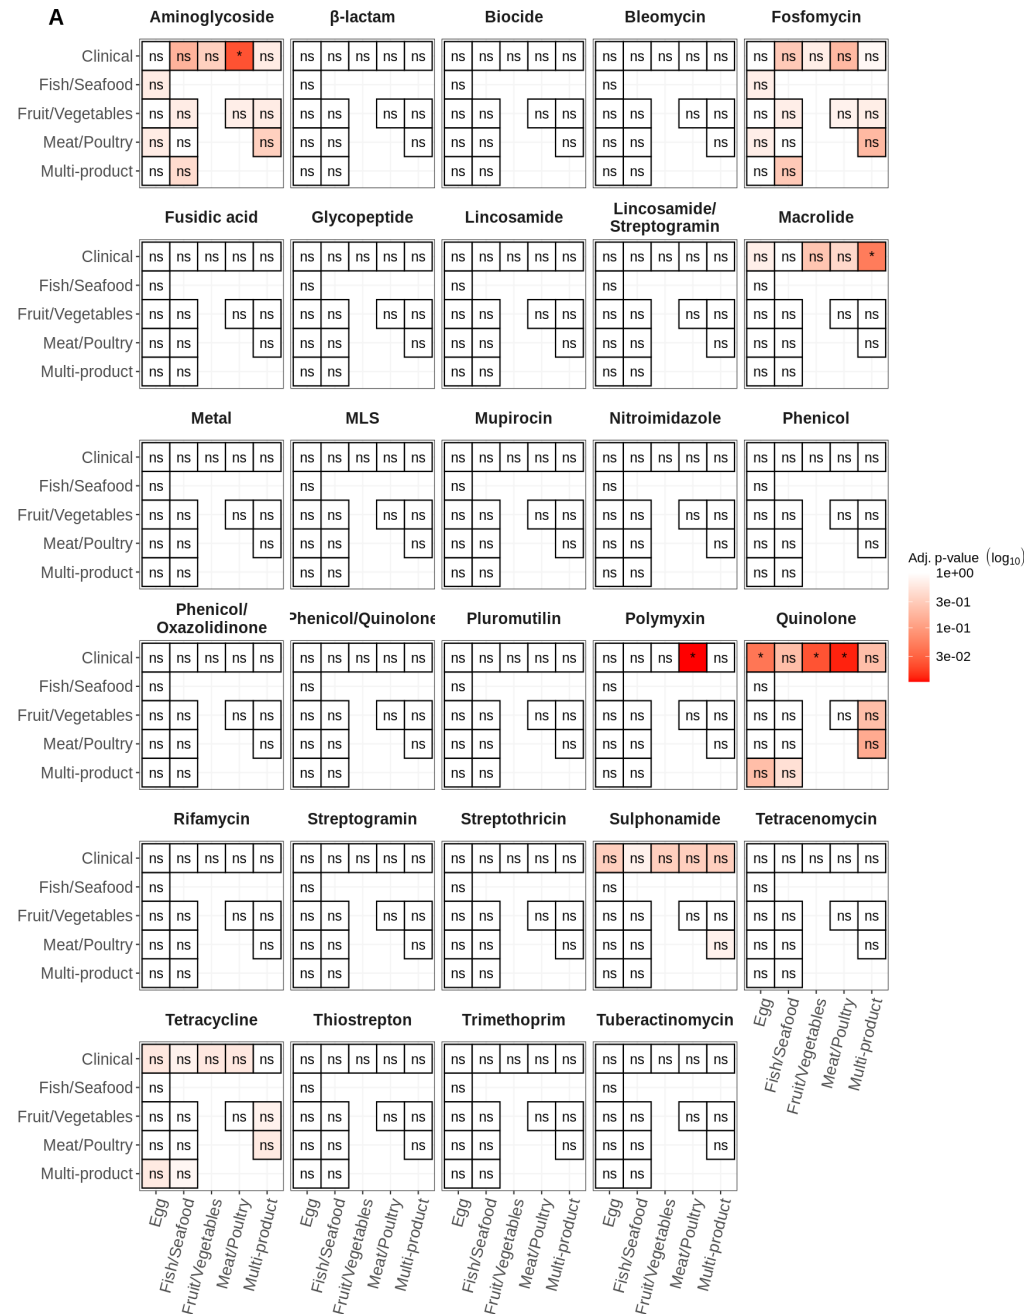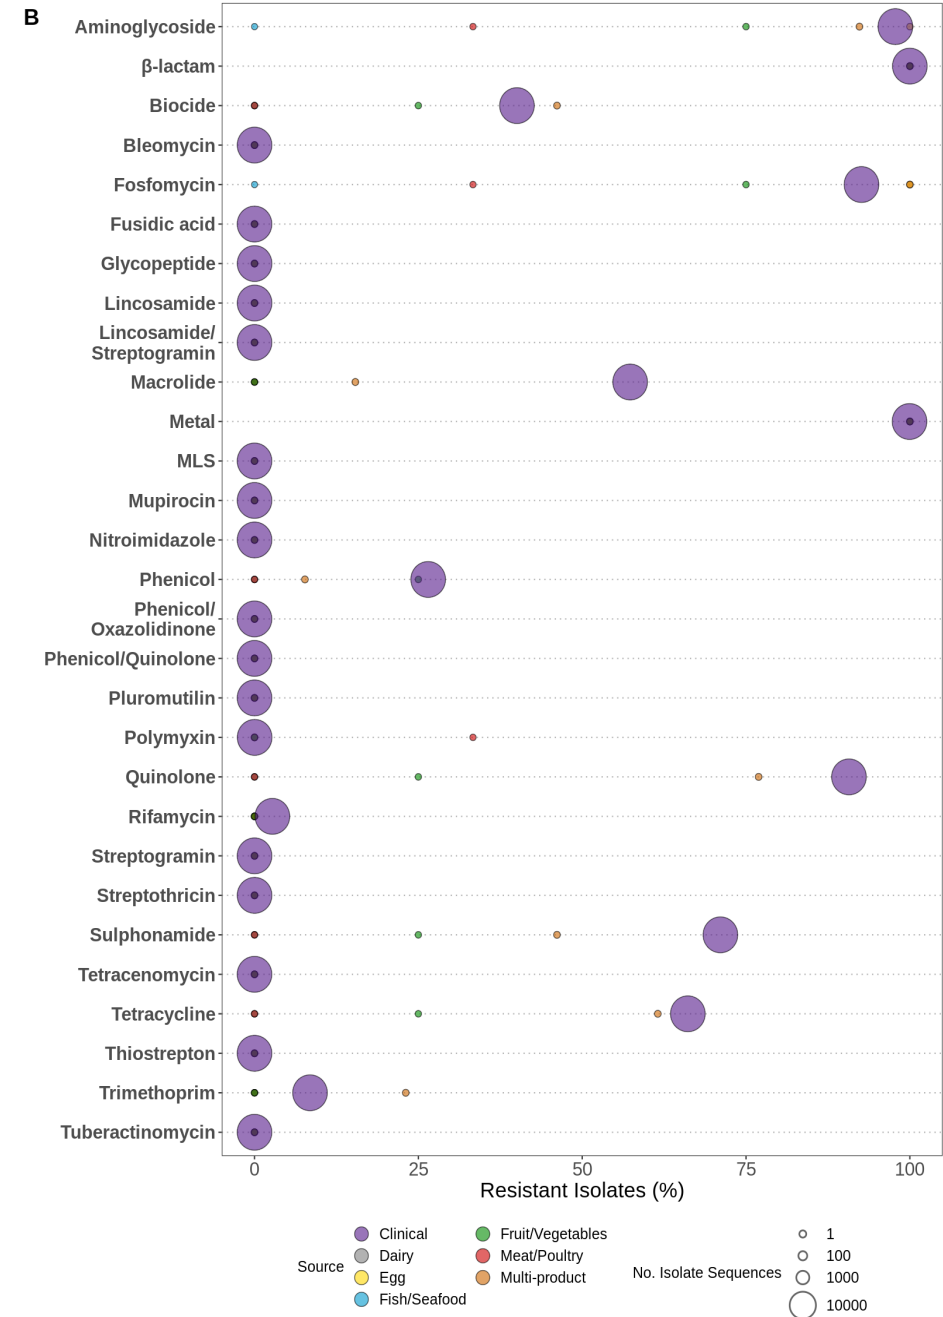

## Aeromonas

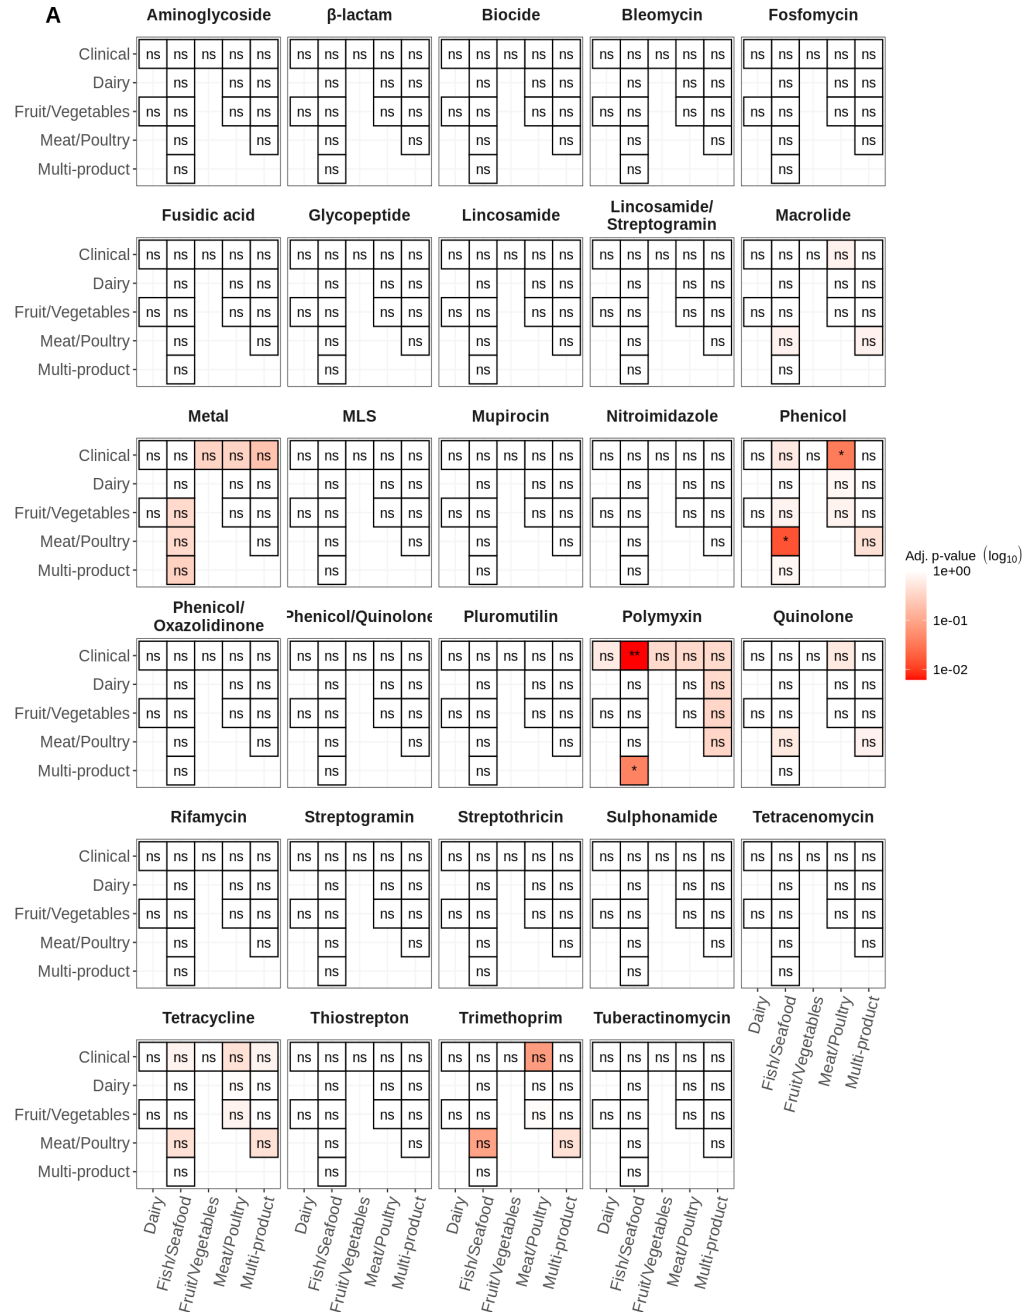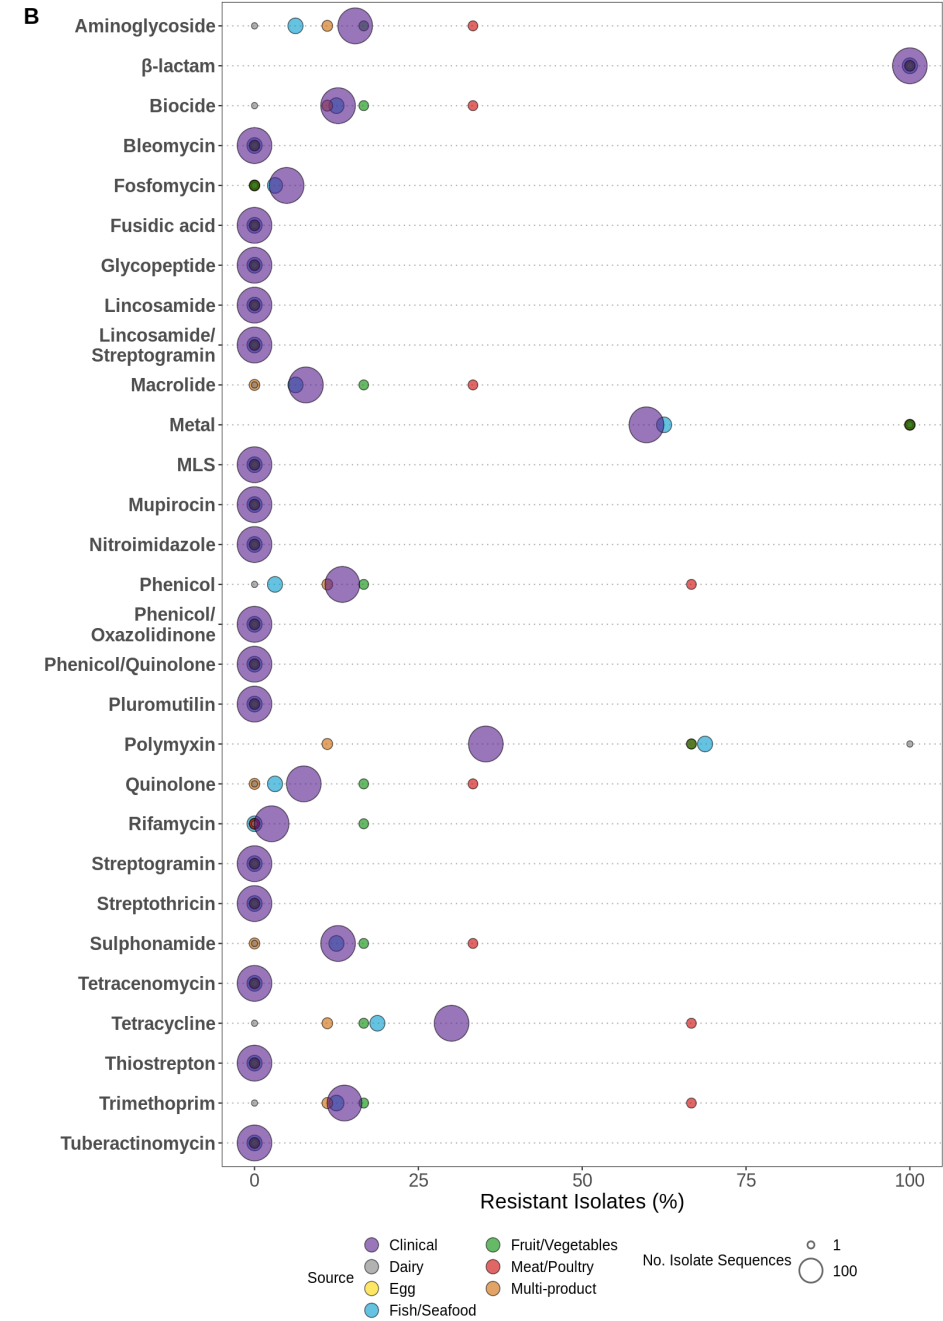

## Bacillus

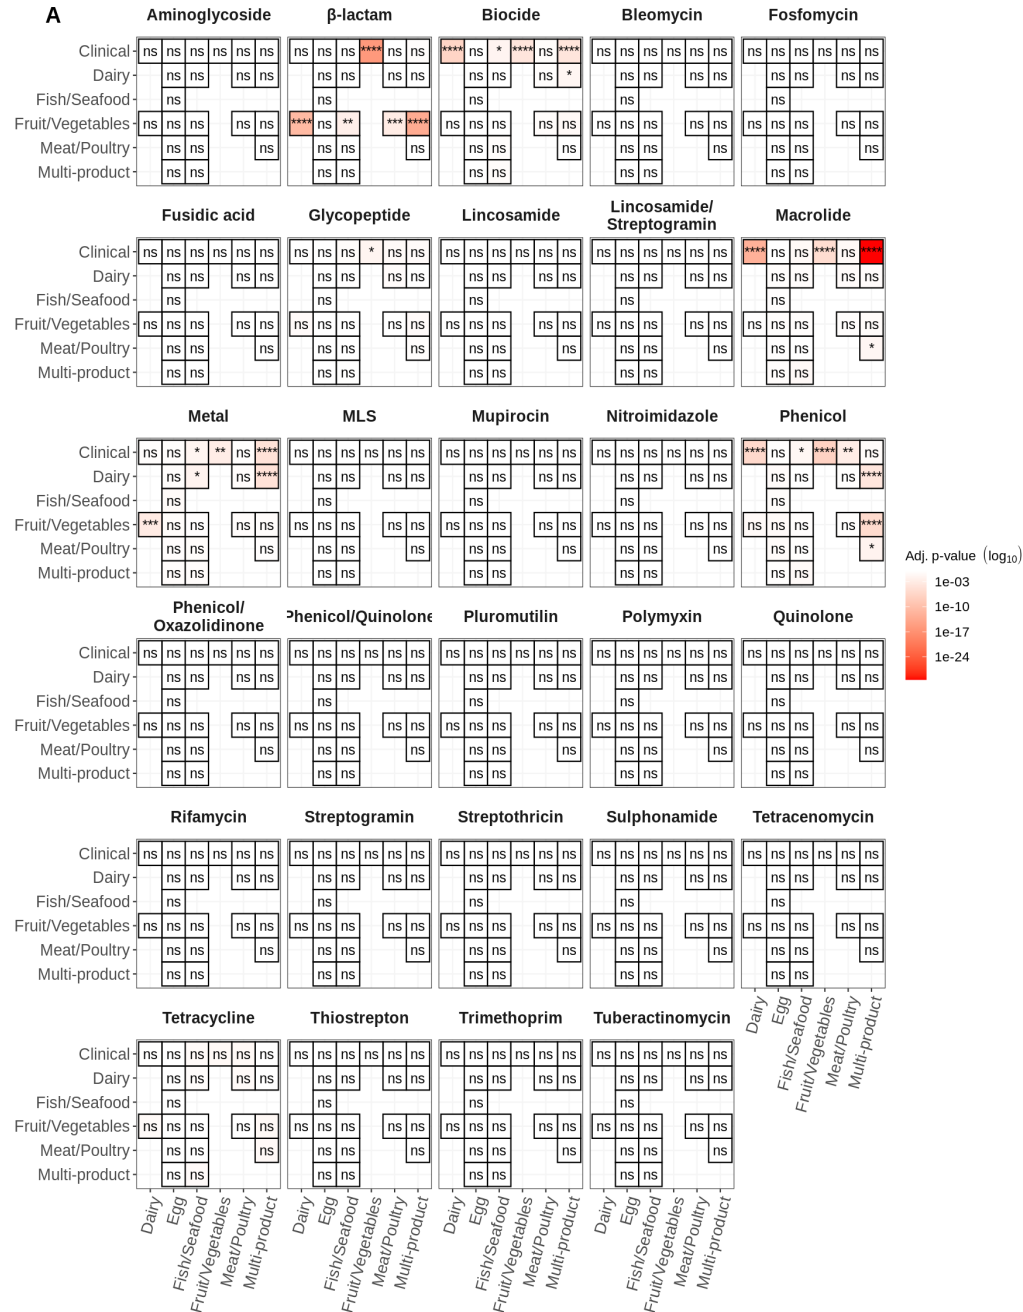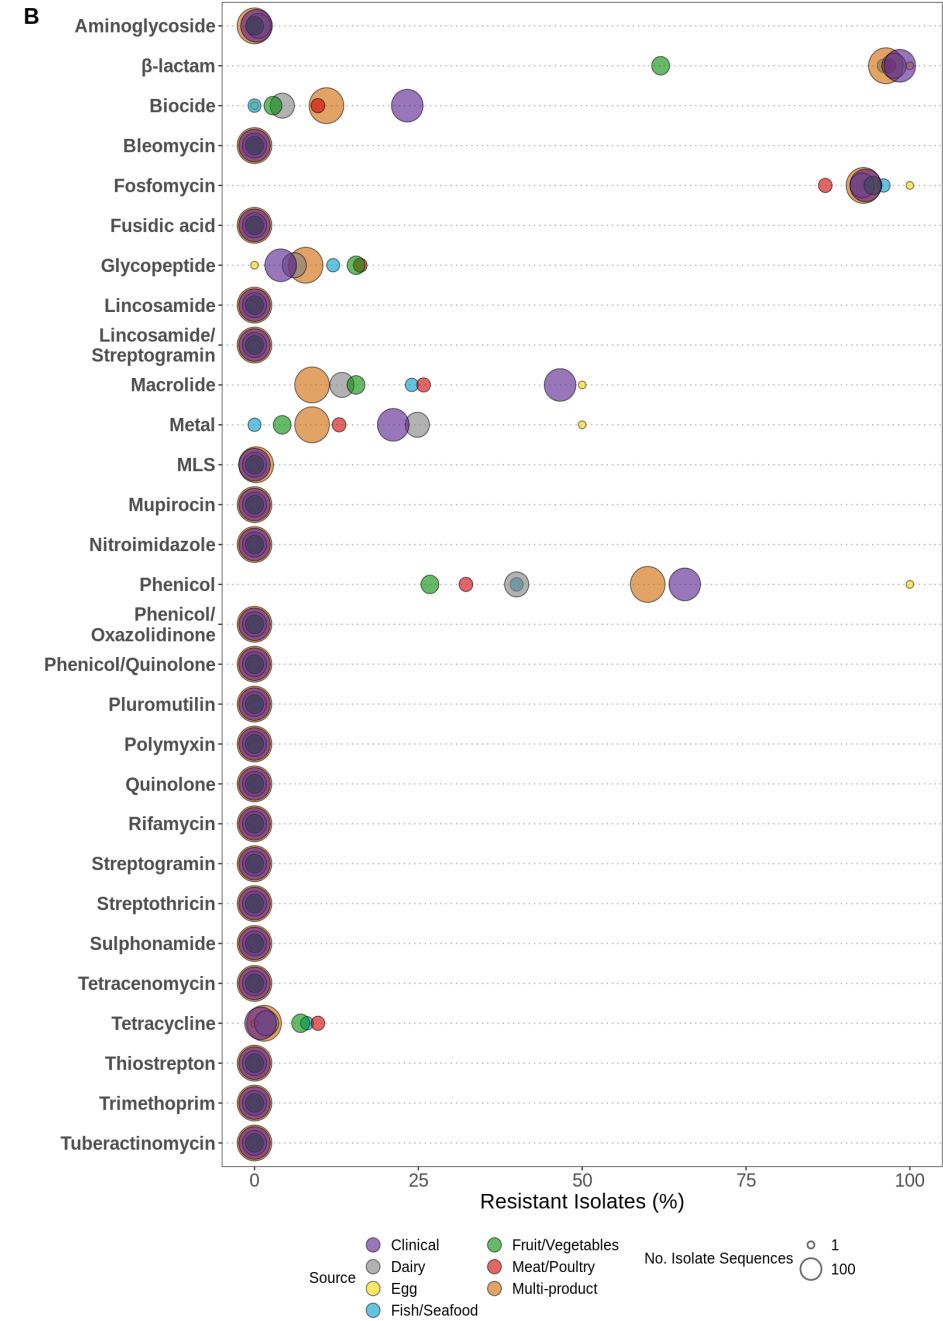



## Campylobacter

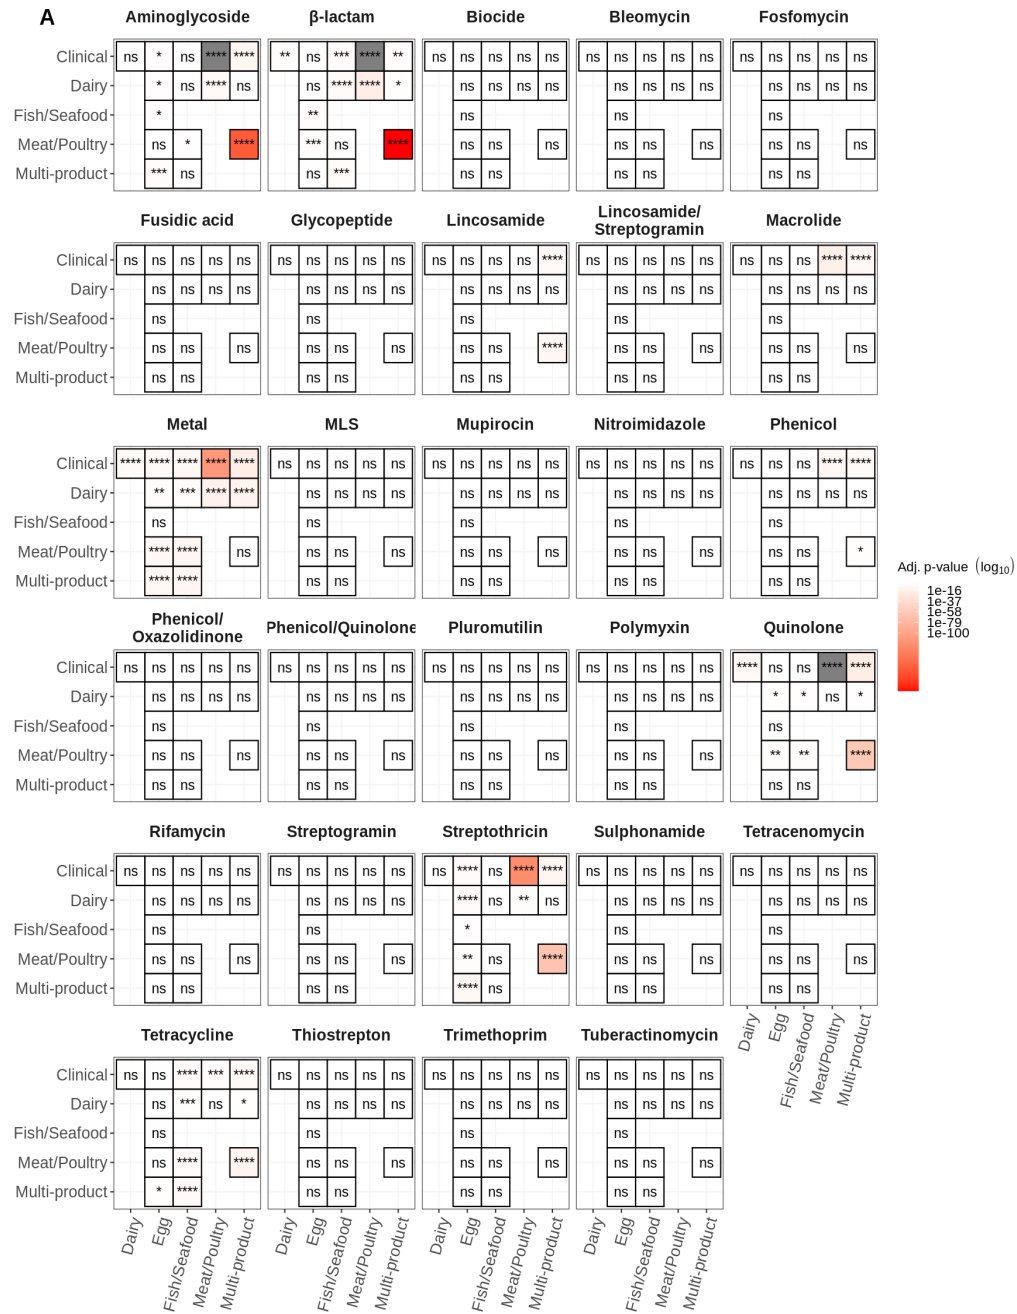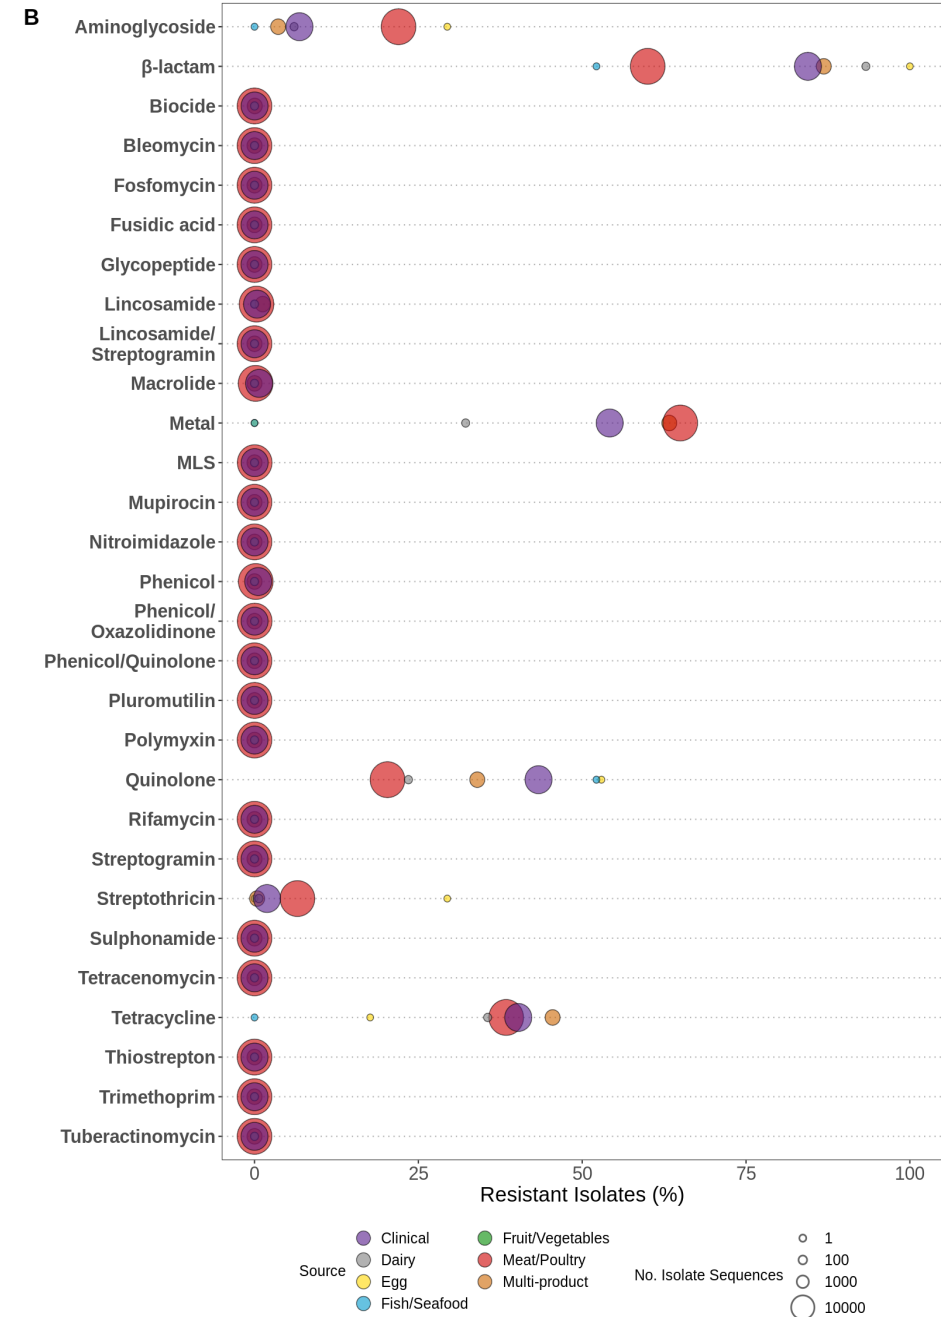

## Citrobacter

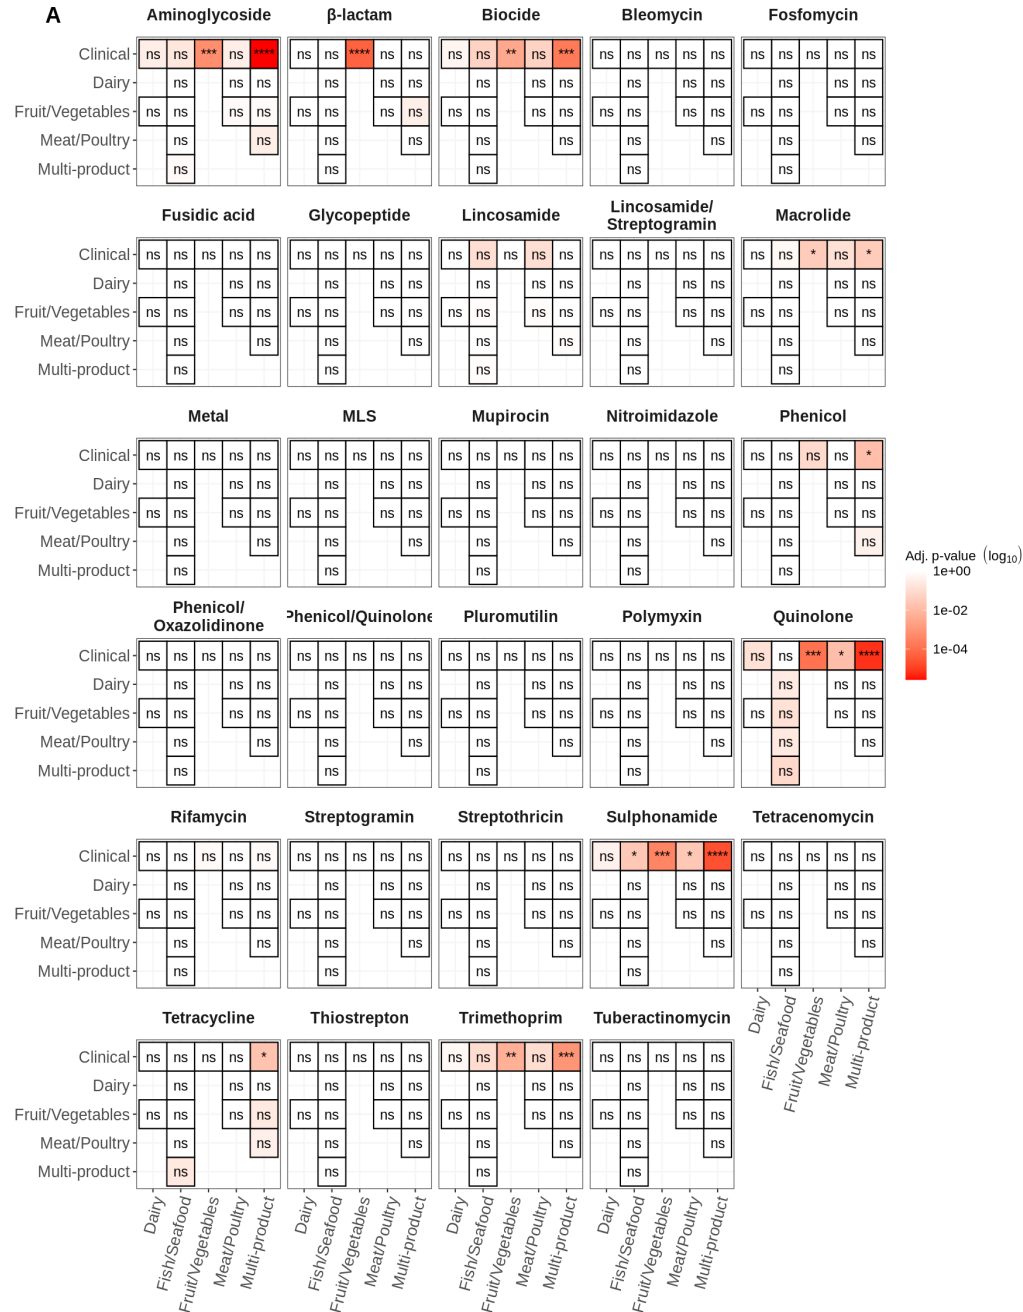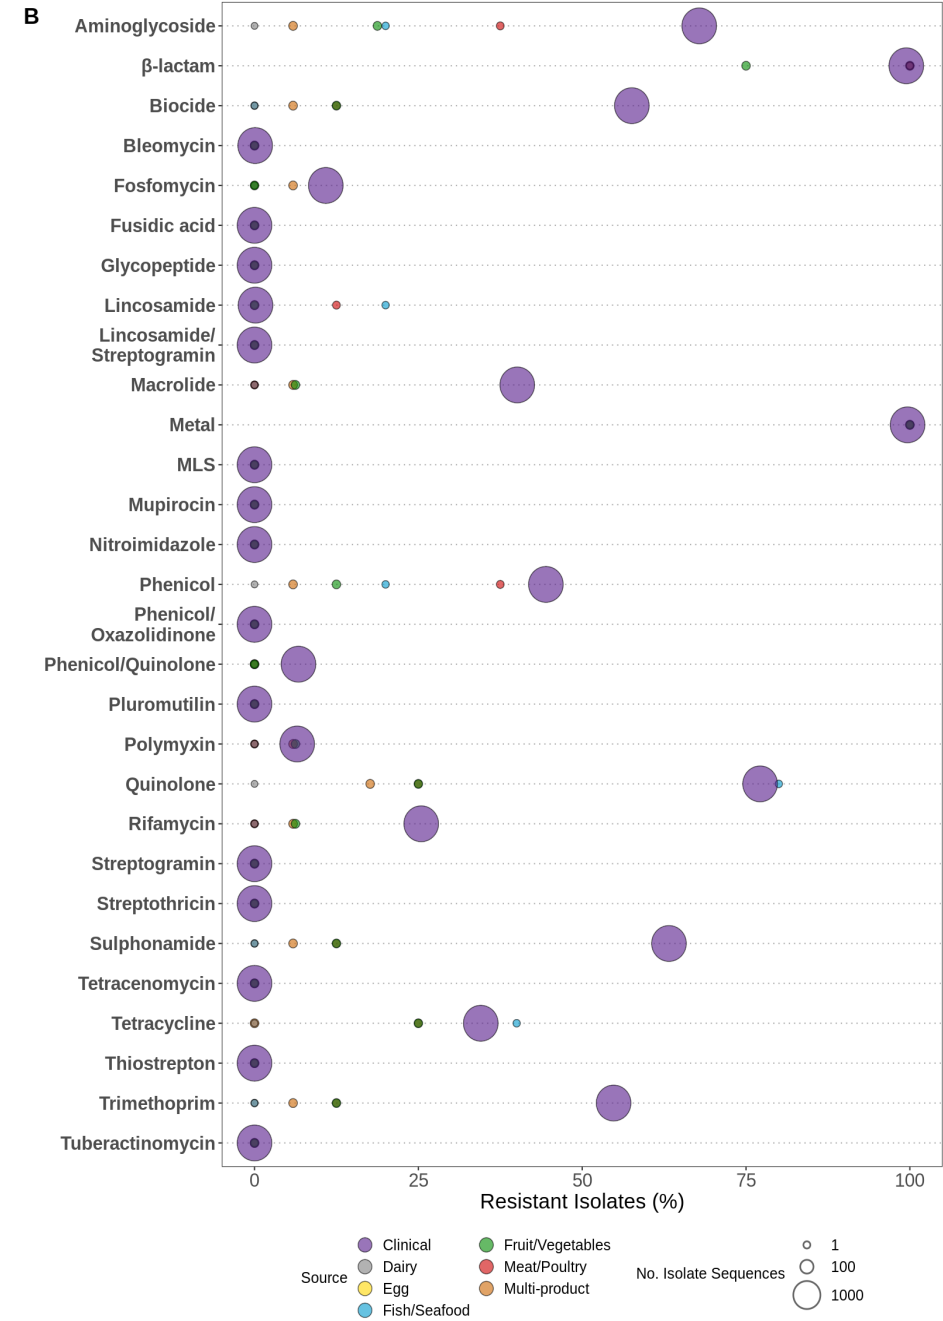

# *Clostridioides difficile*

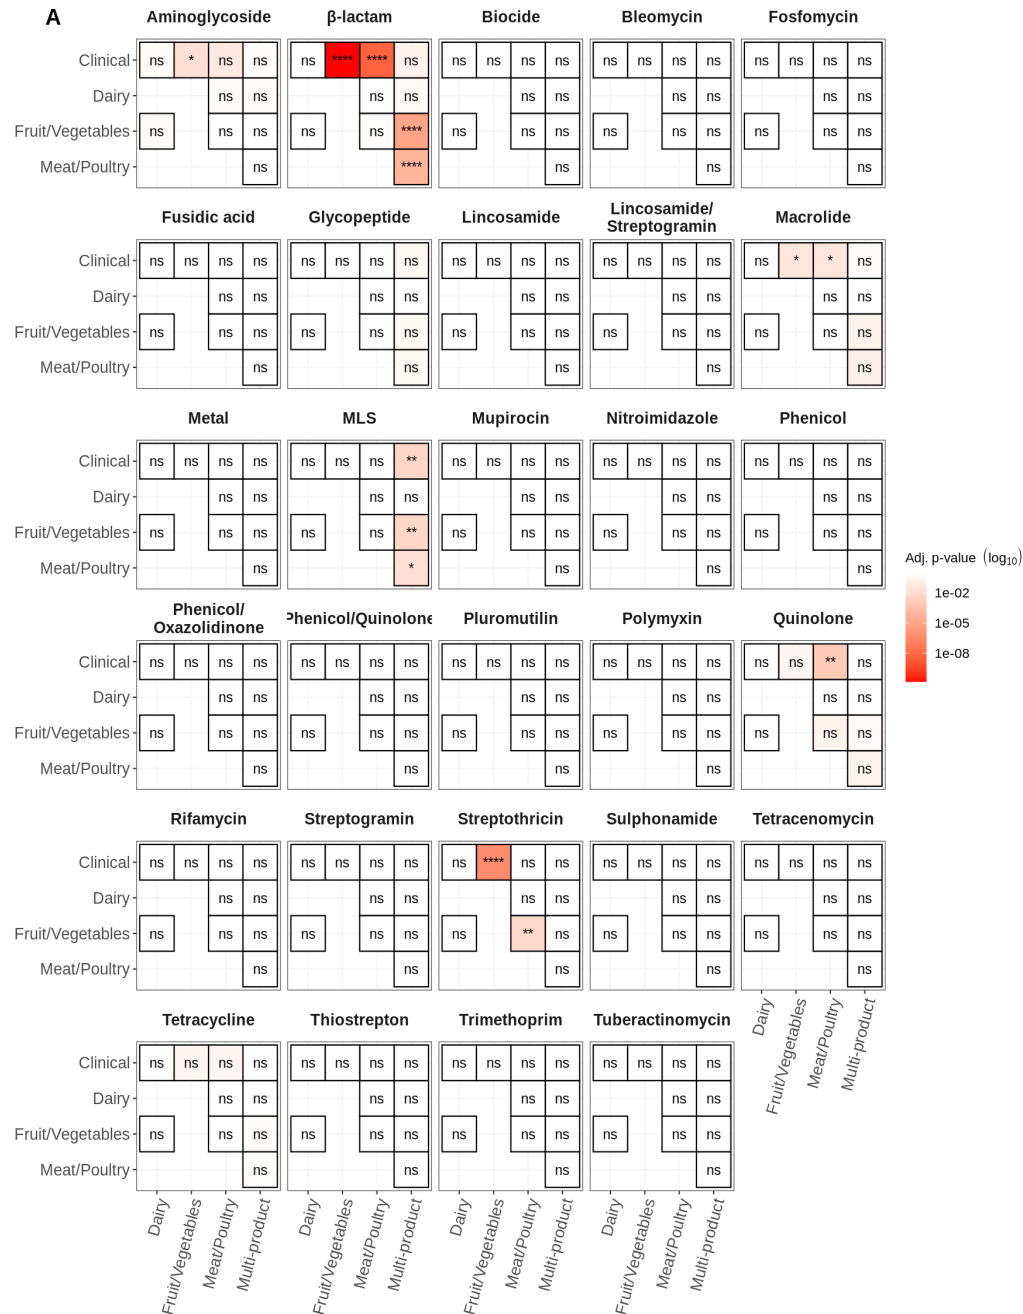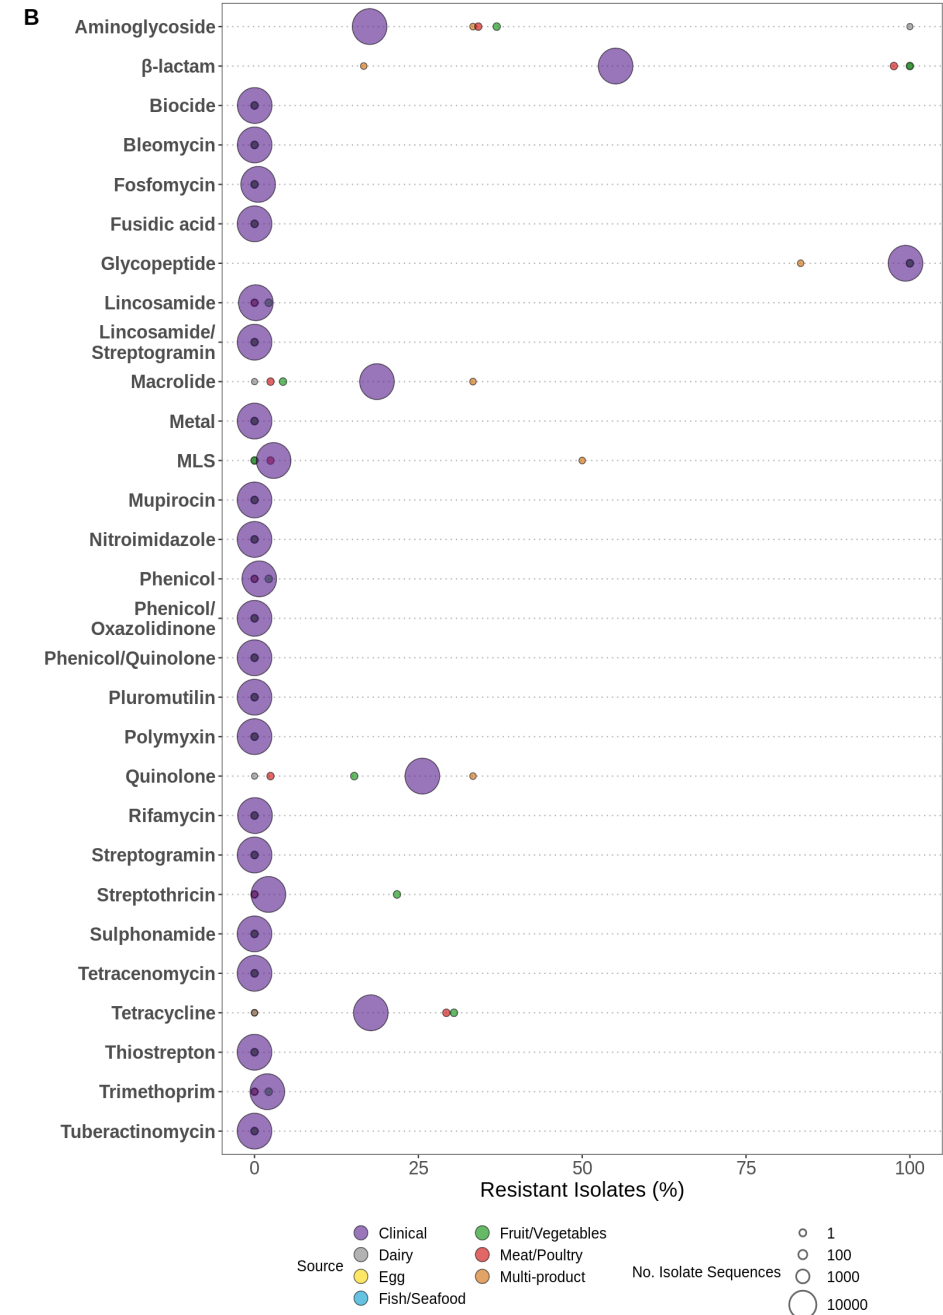

## Clostridium

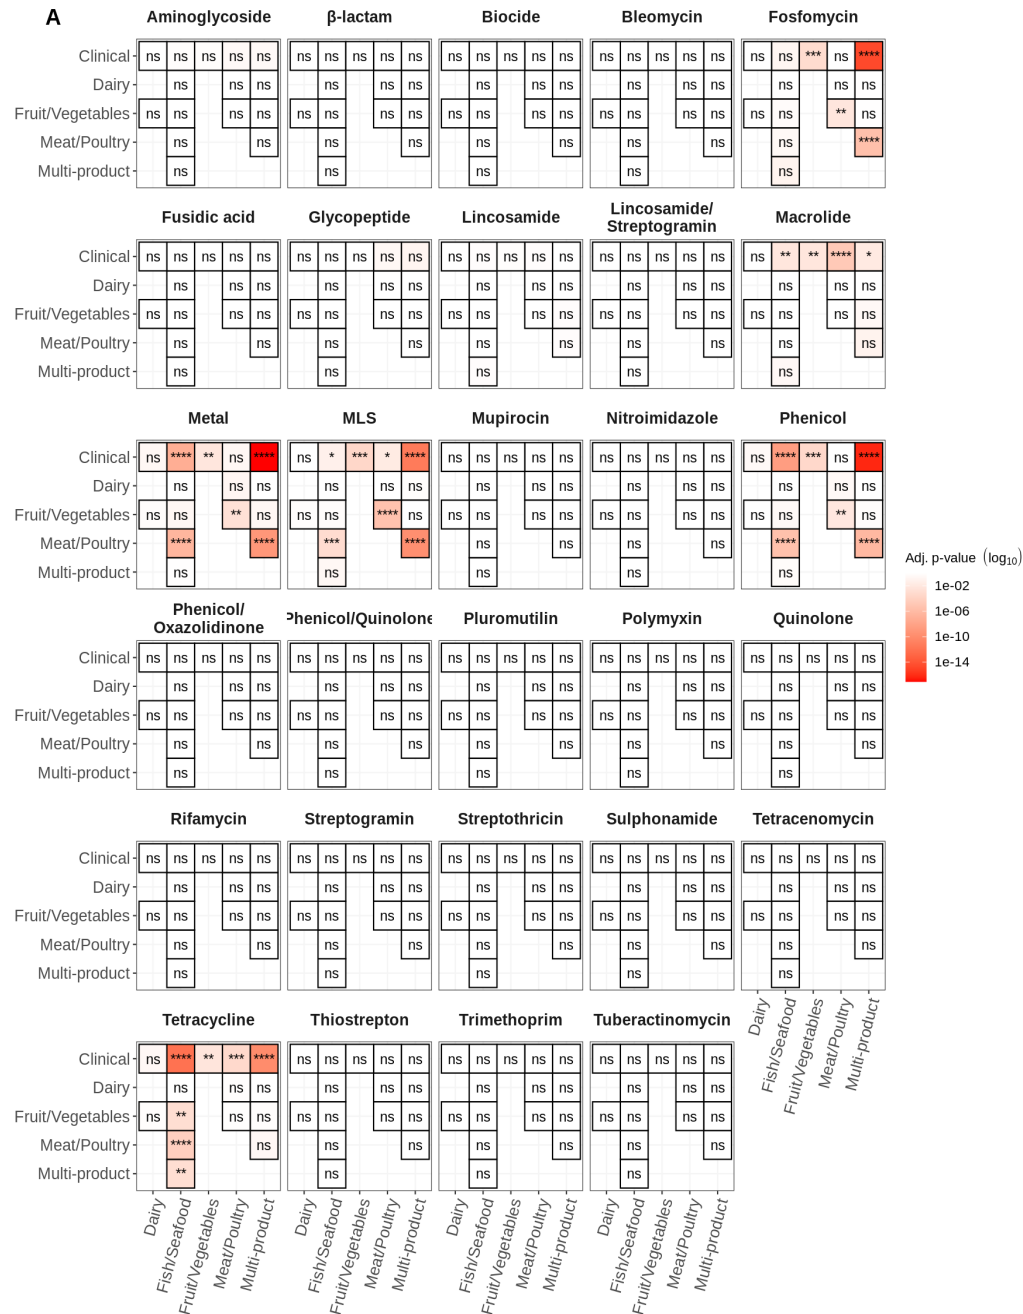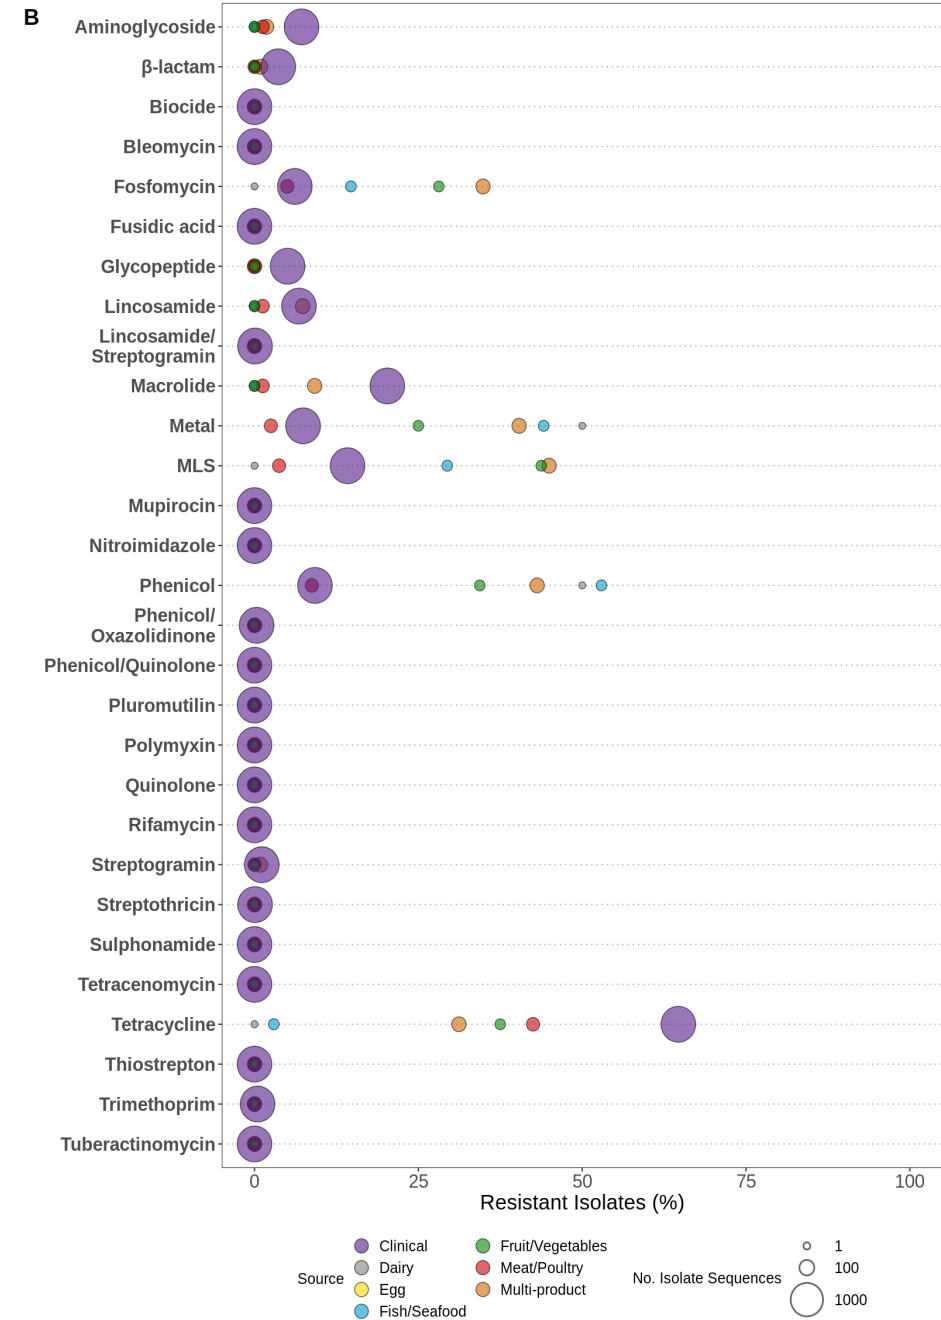

## Enterobacter

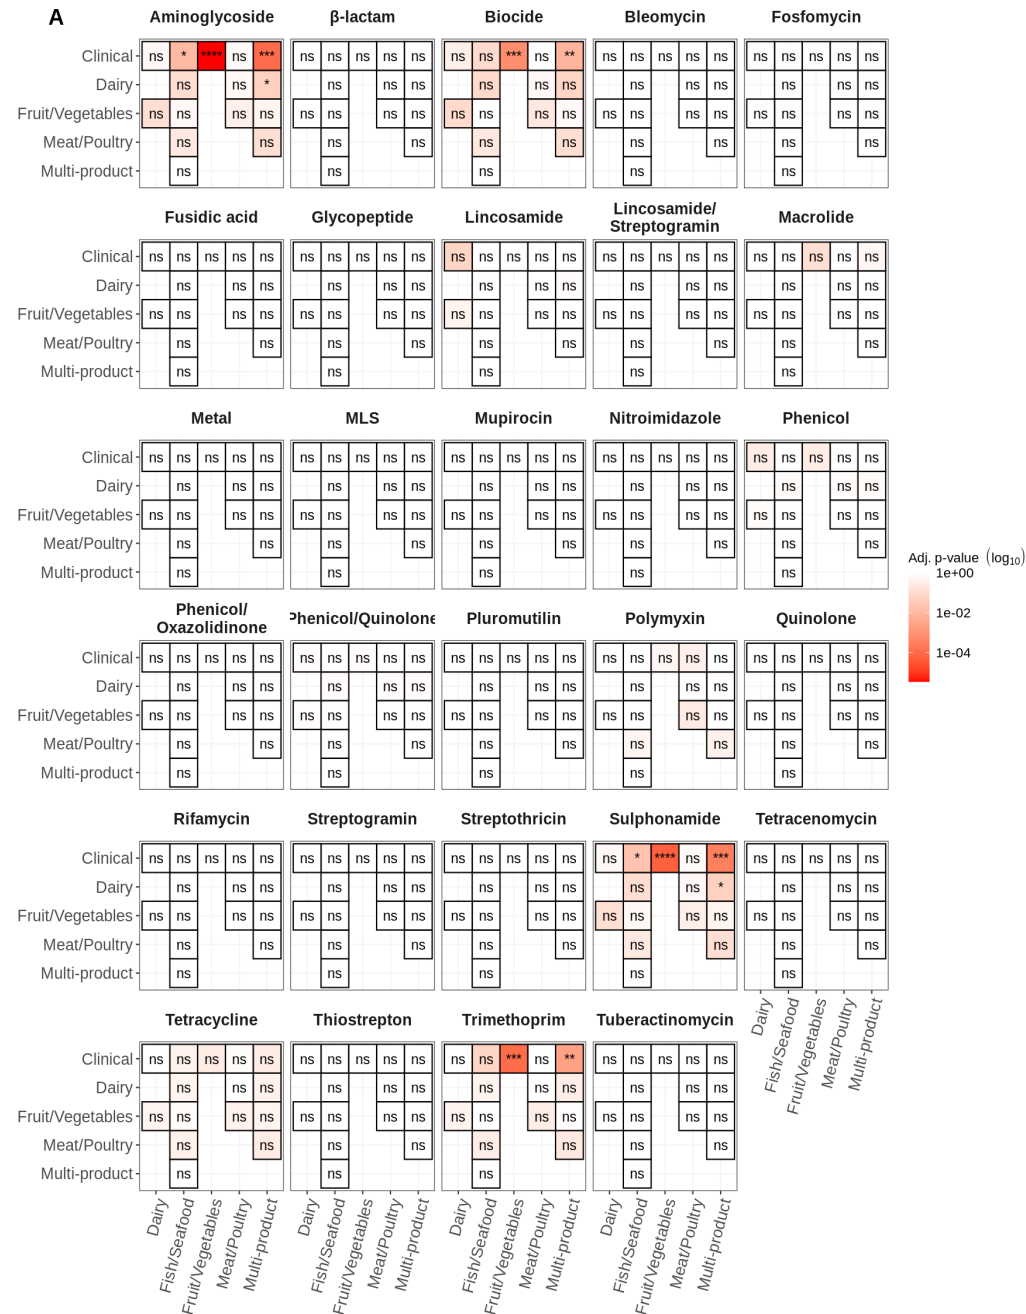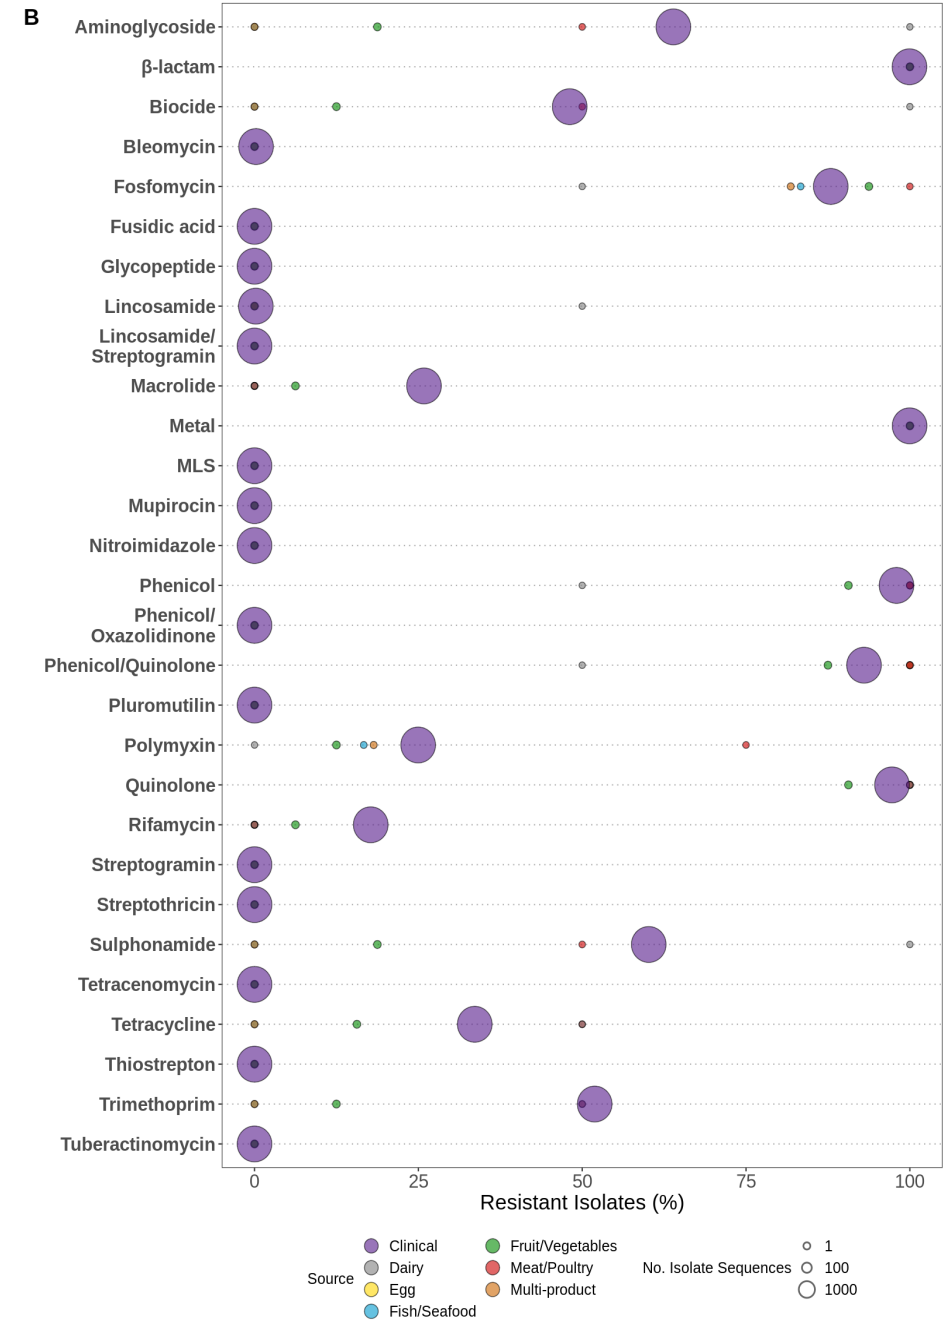

## Enterococcus

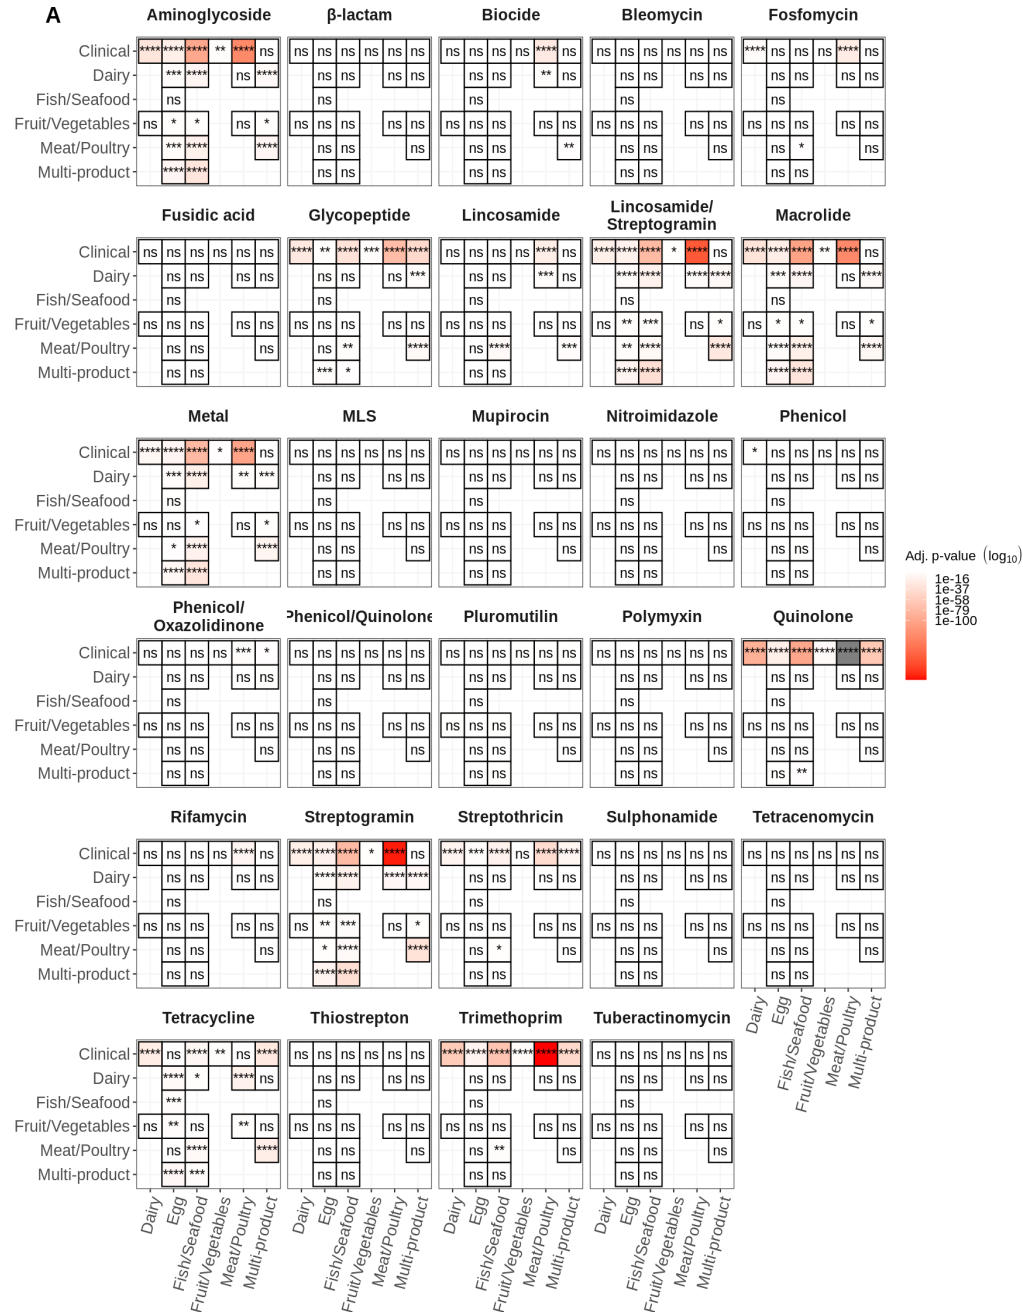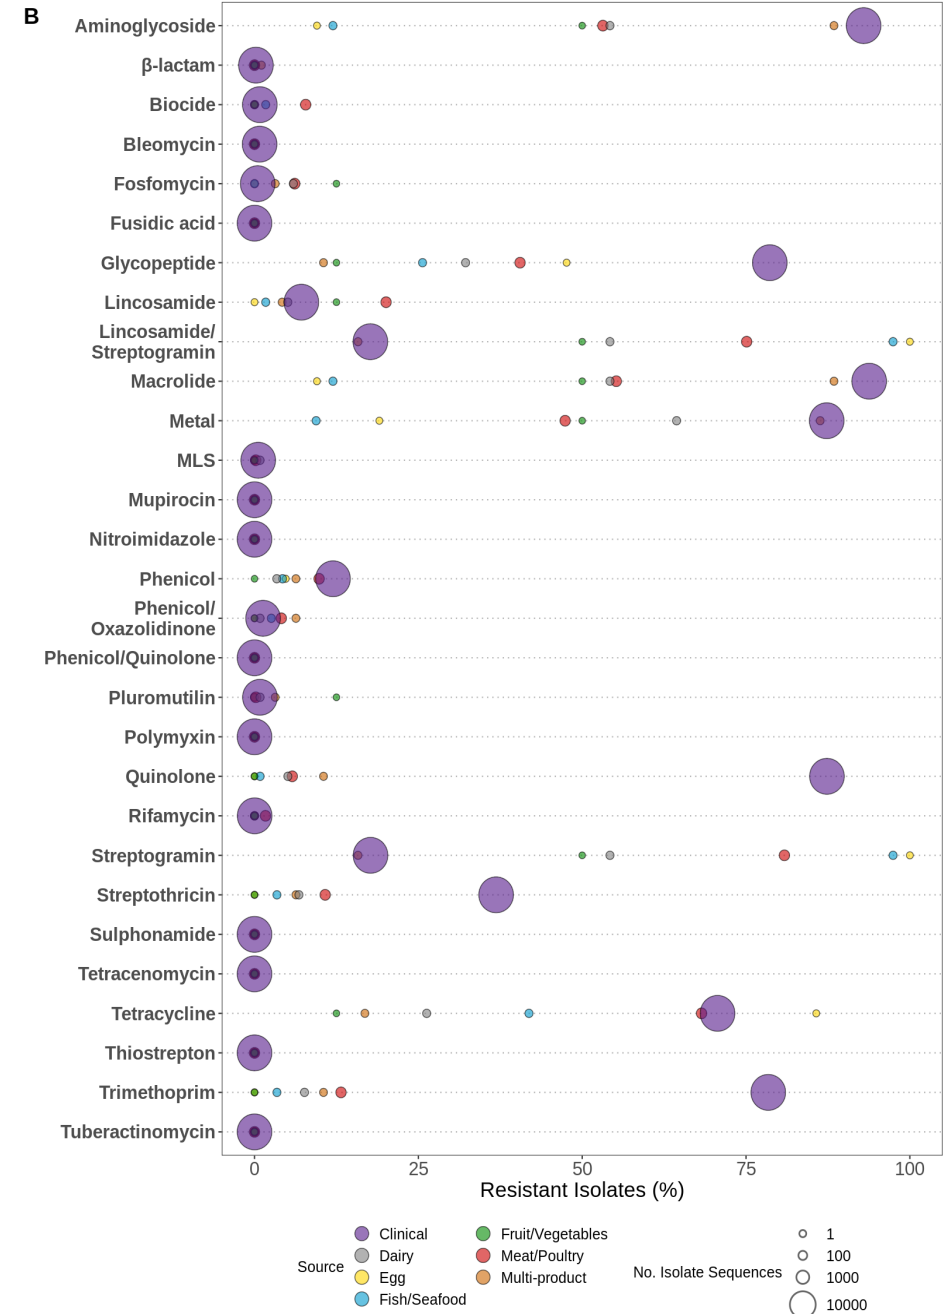



***Escherichia***

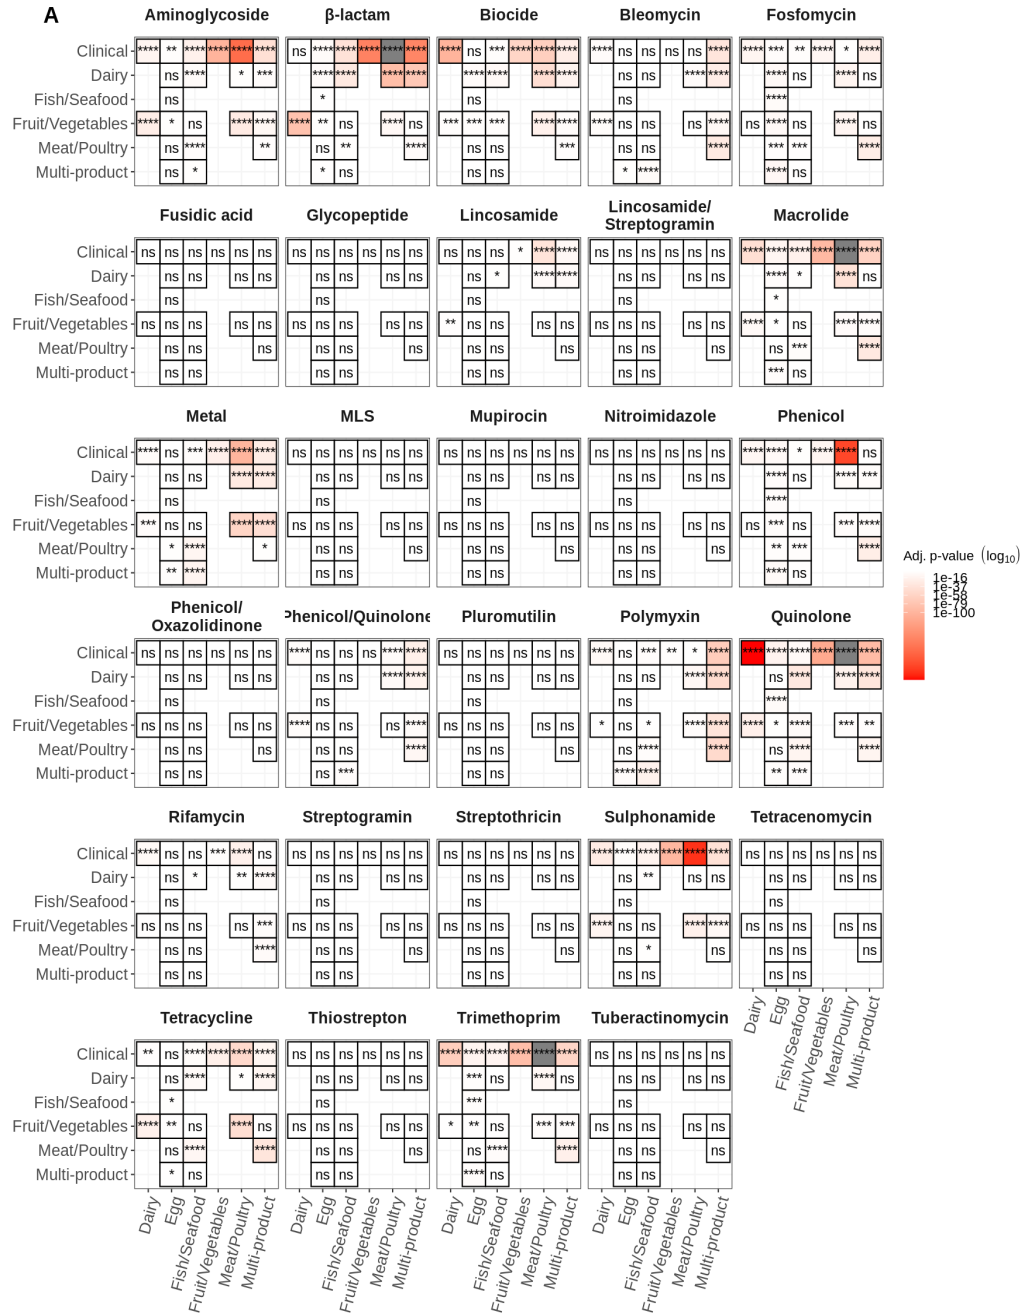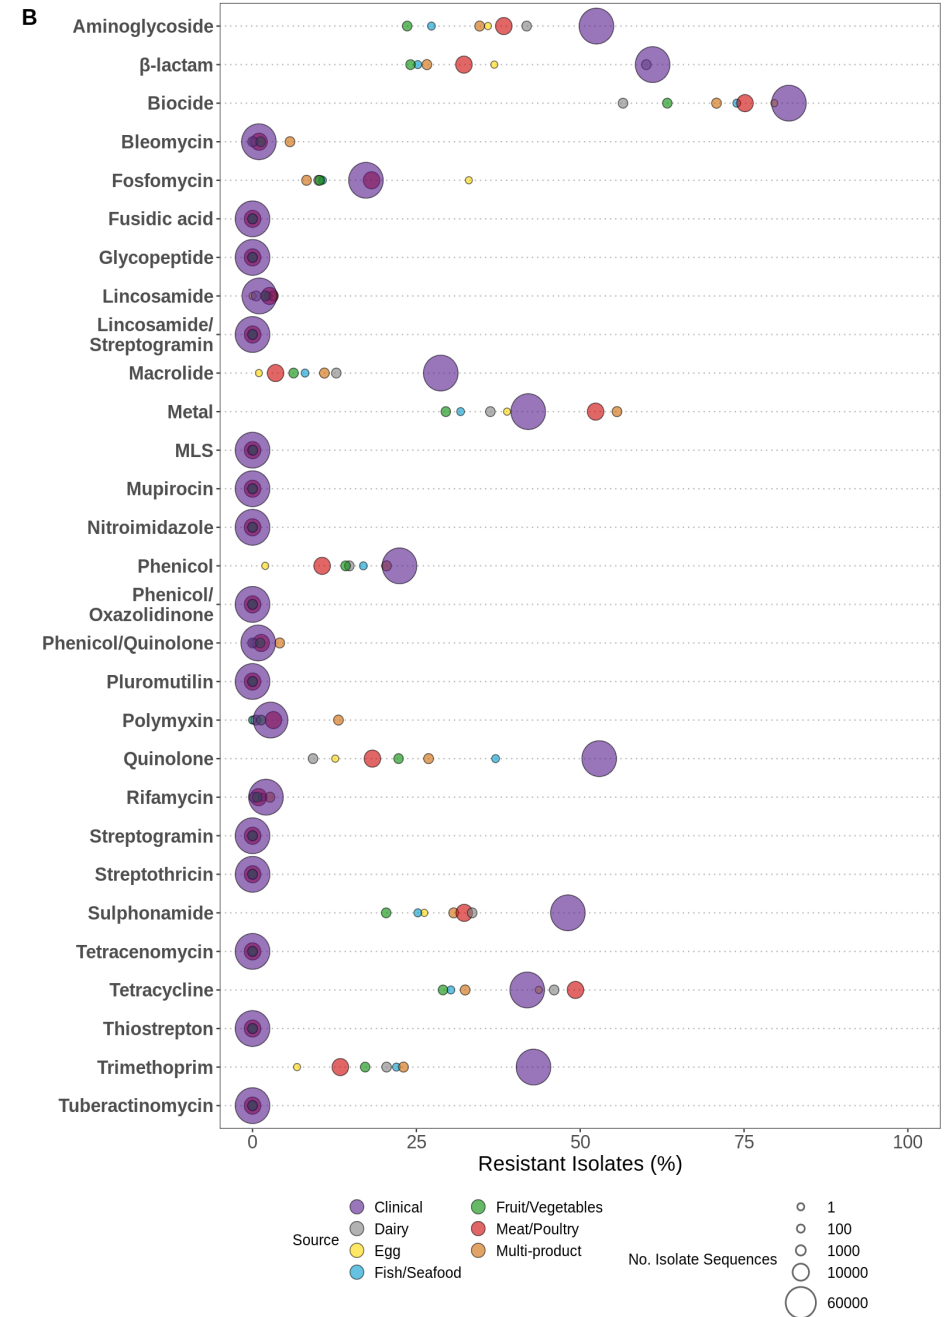



## Klebsiella

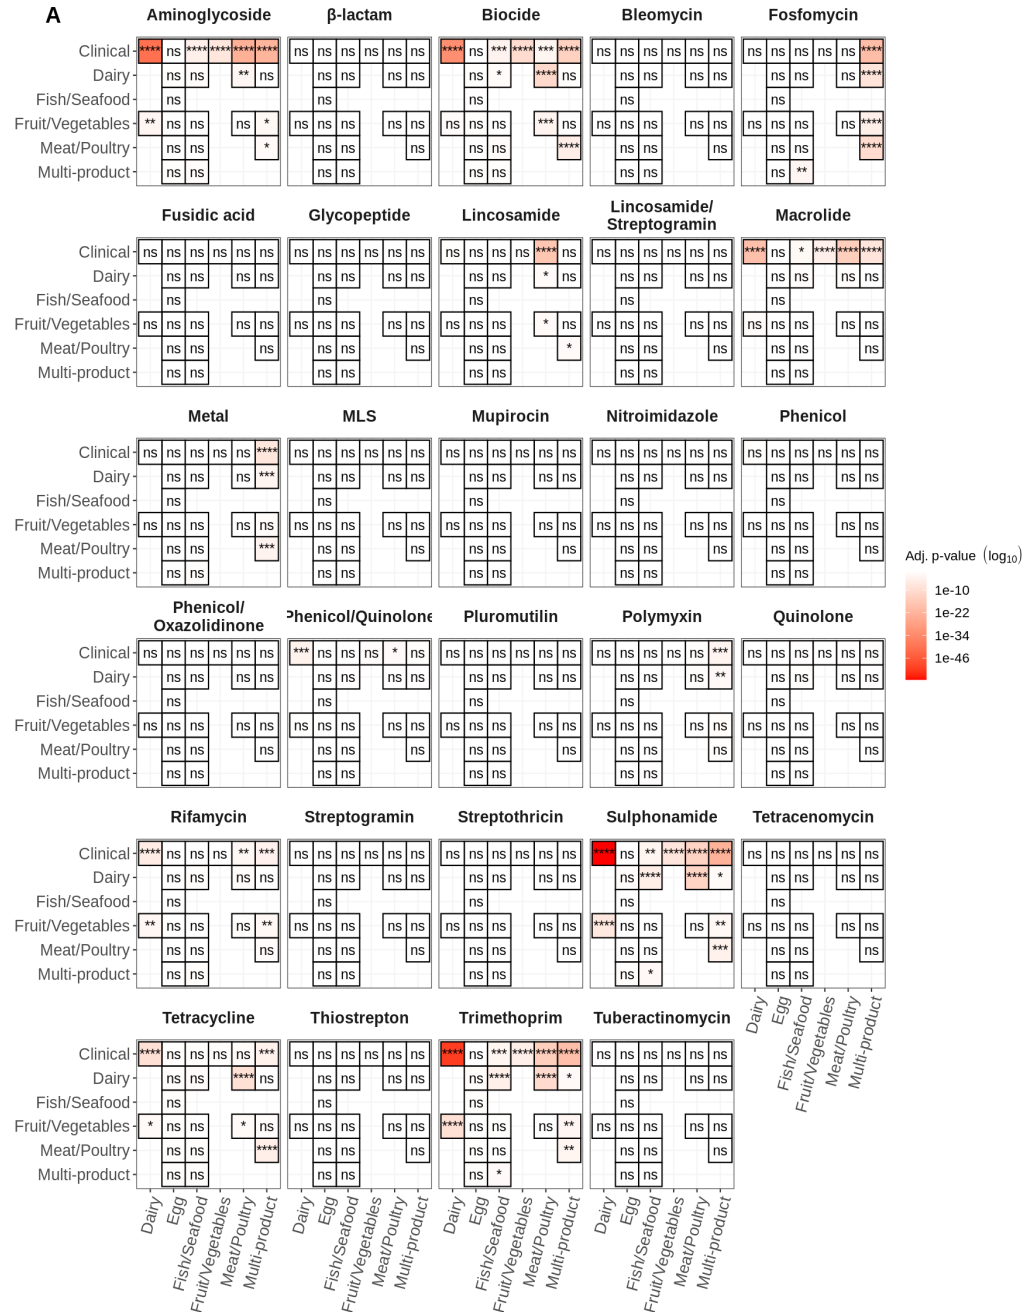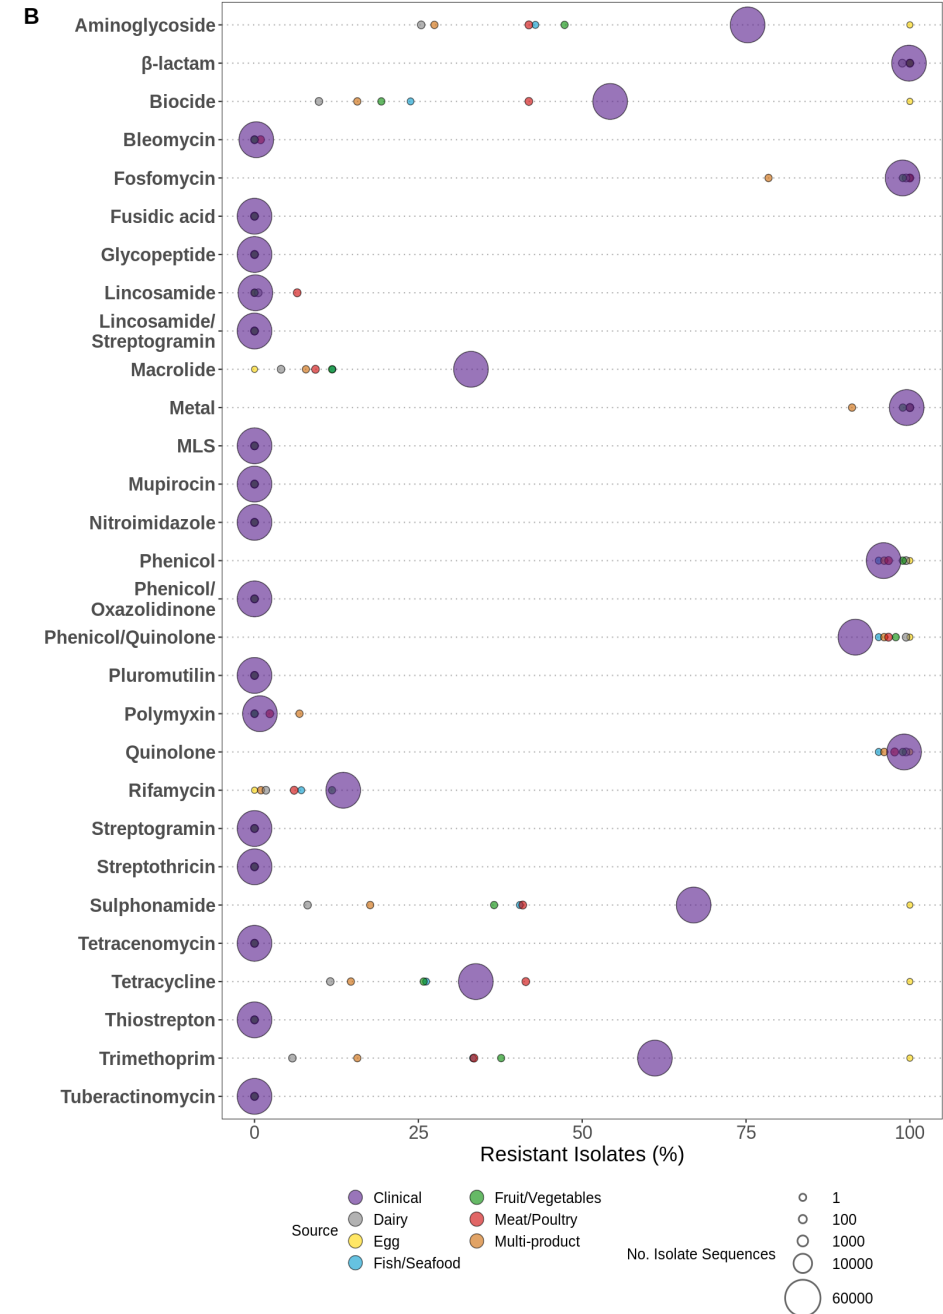

## Listeria

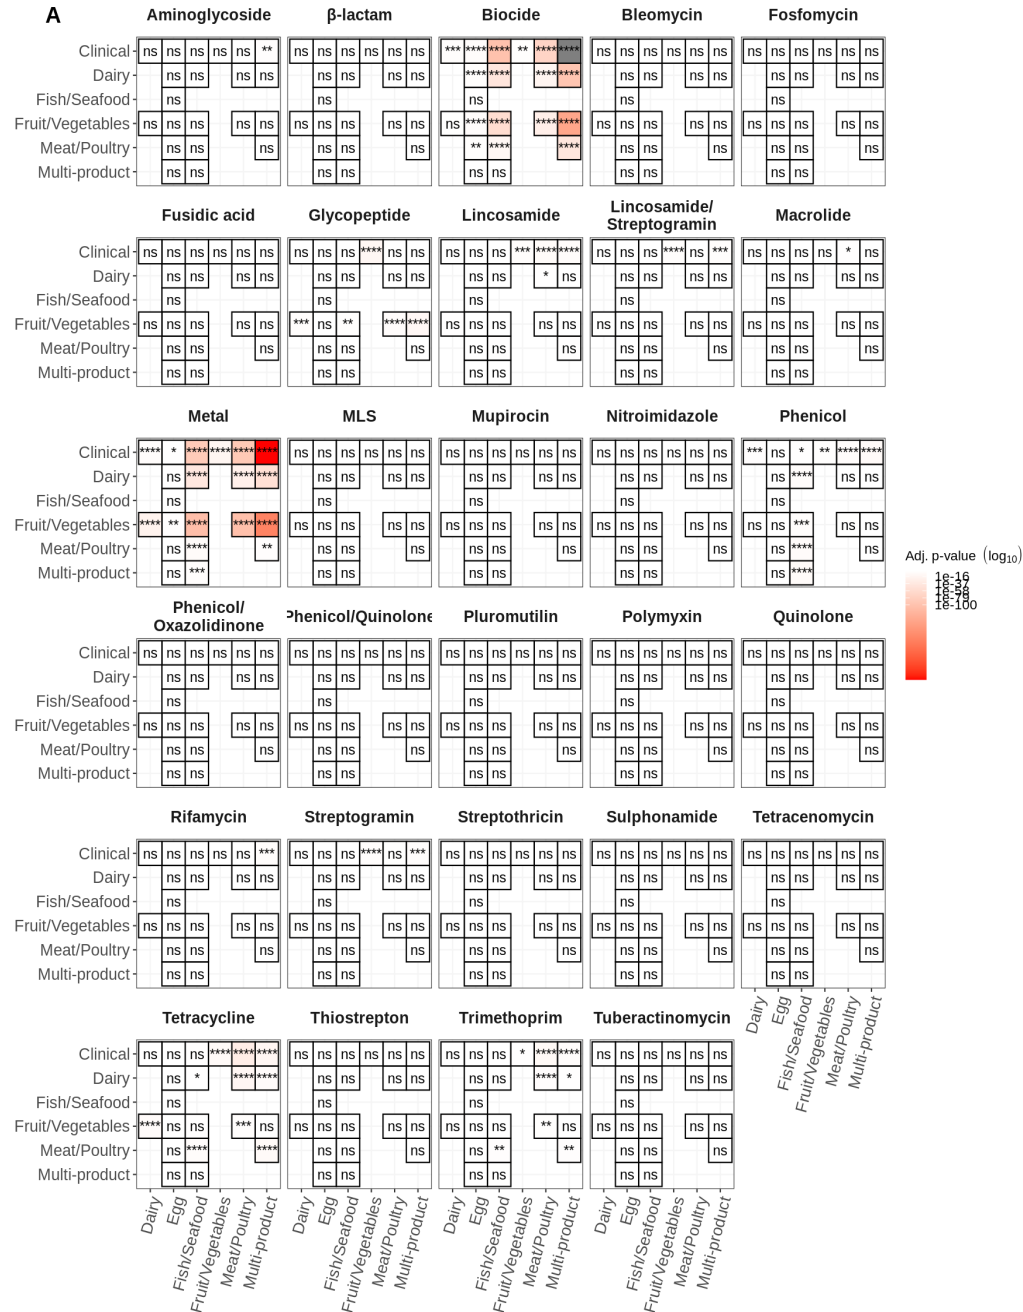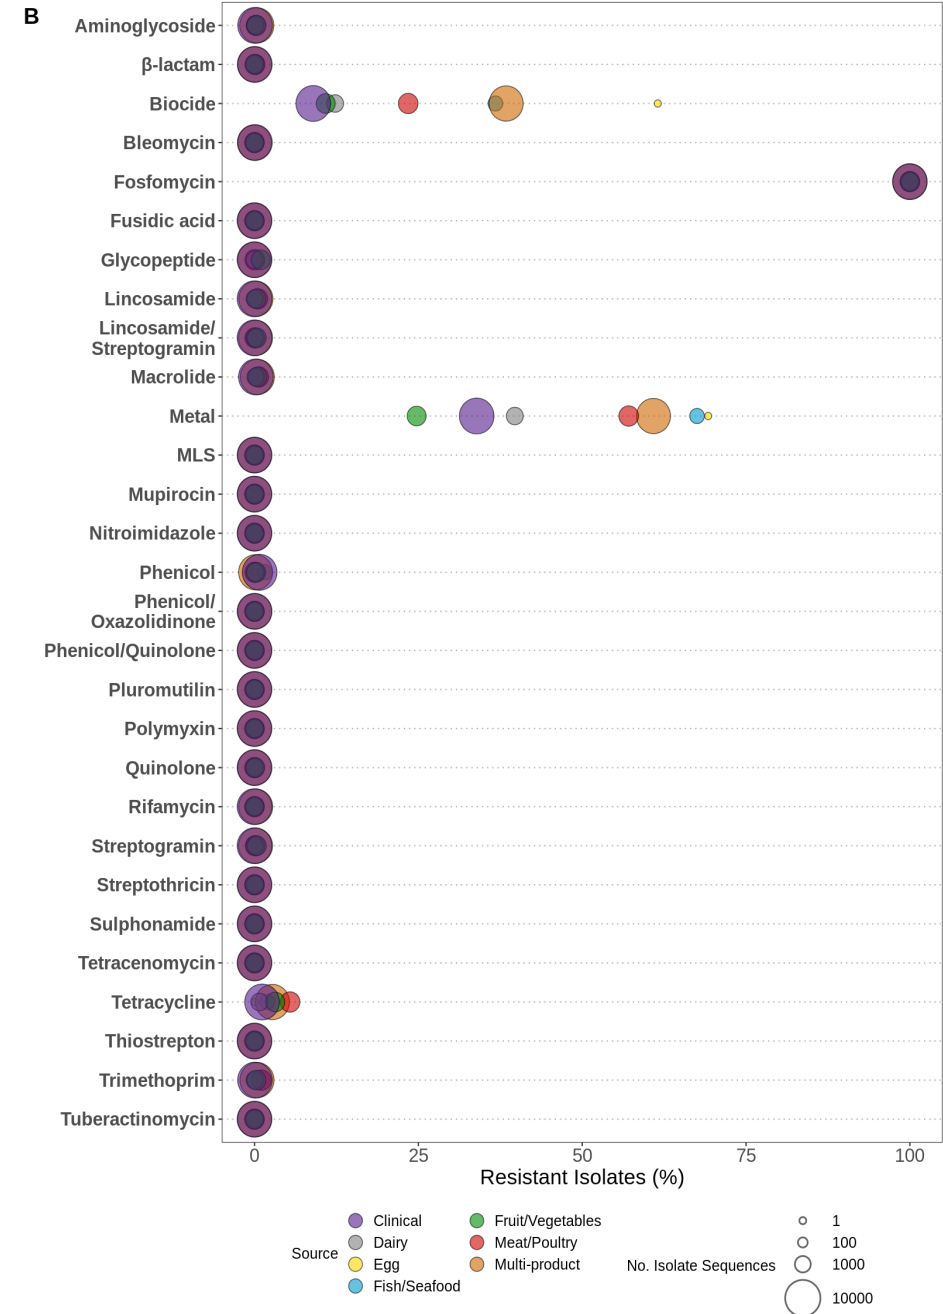

# Morganella

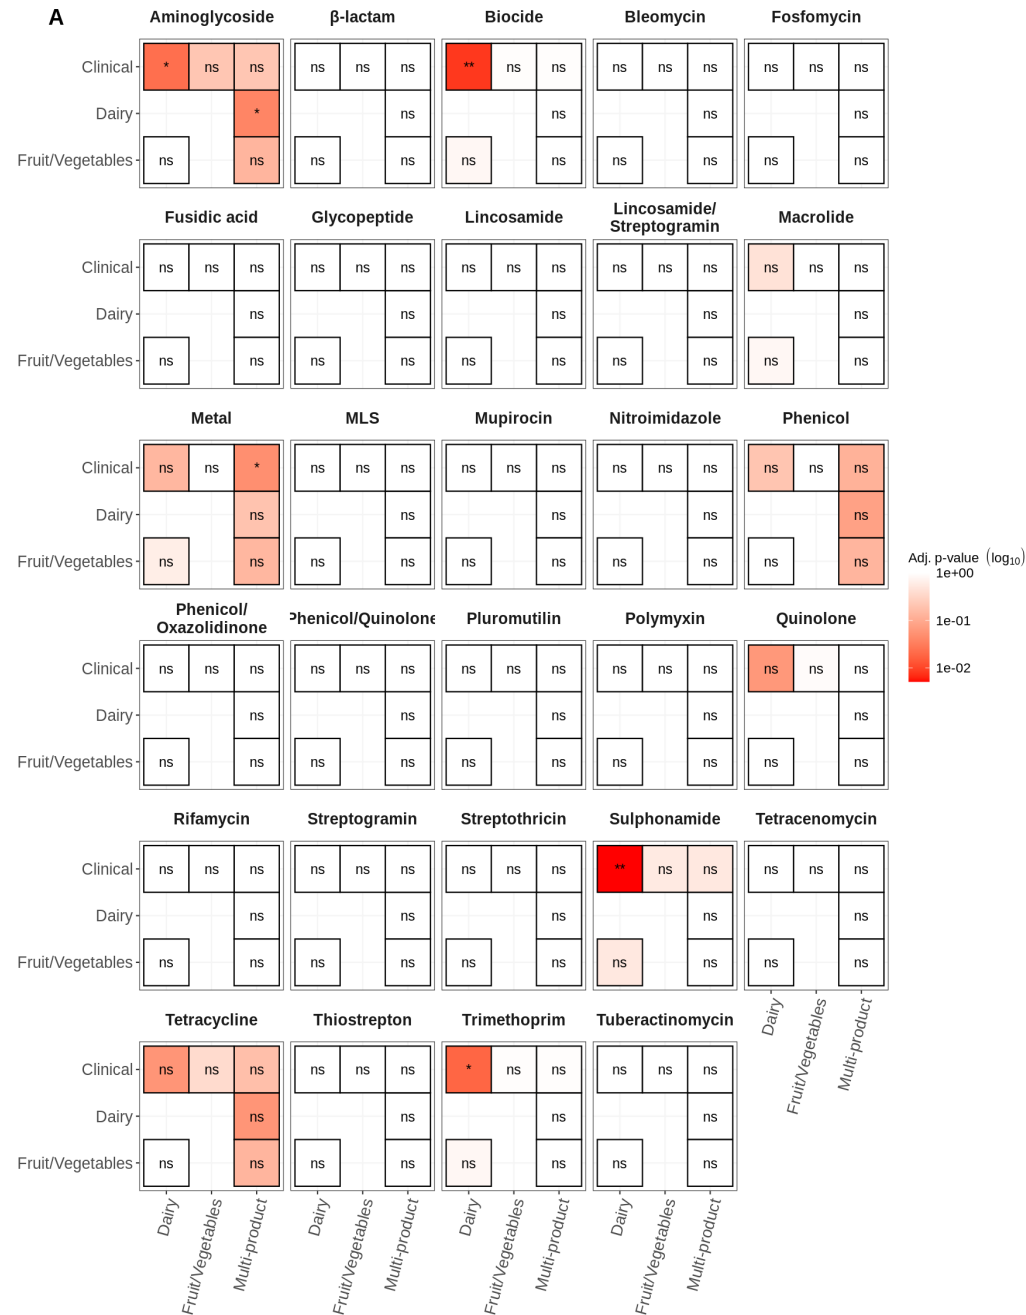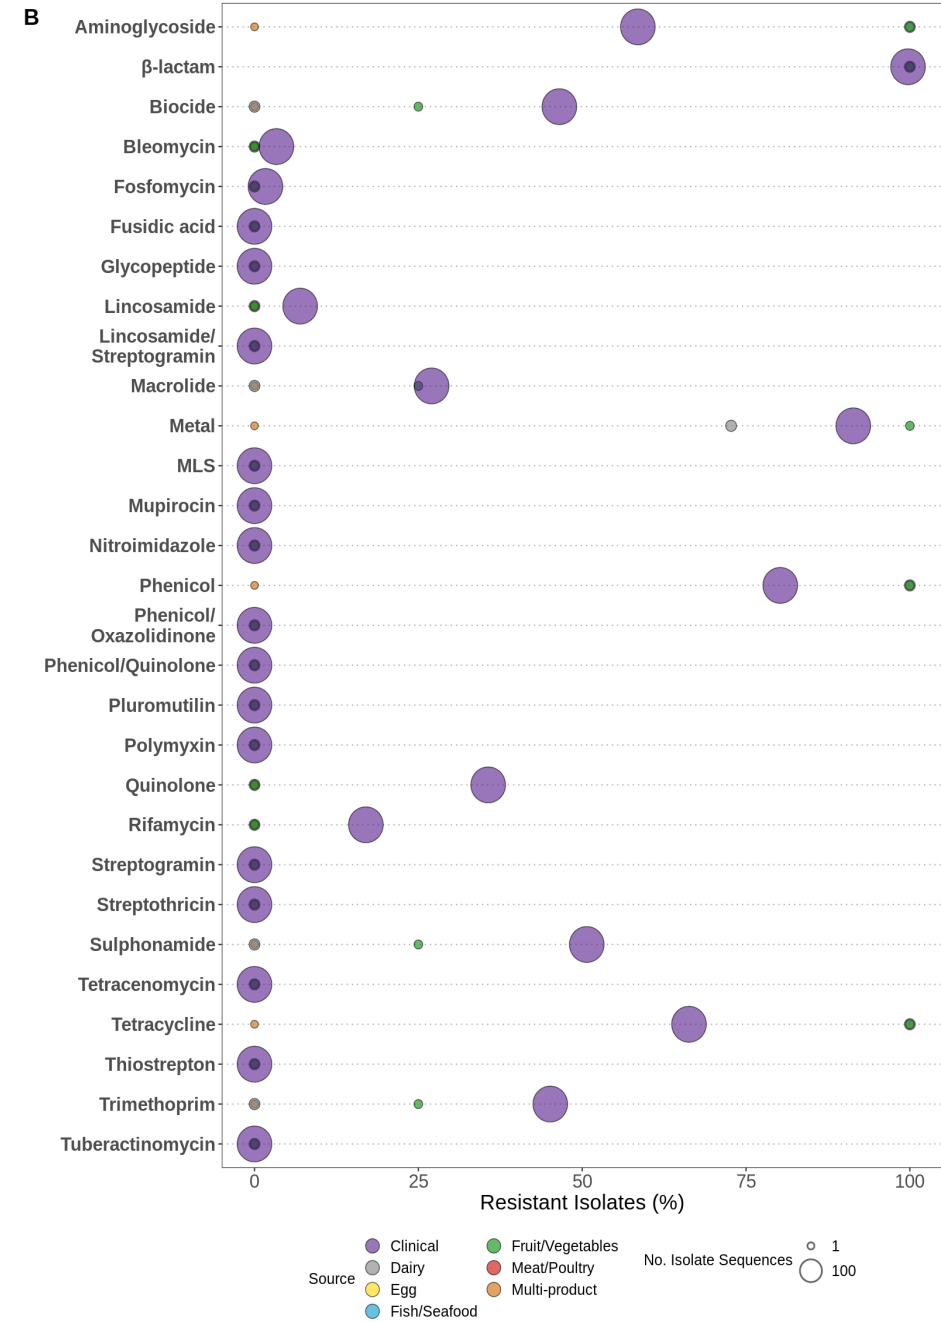

## Providencia

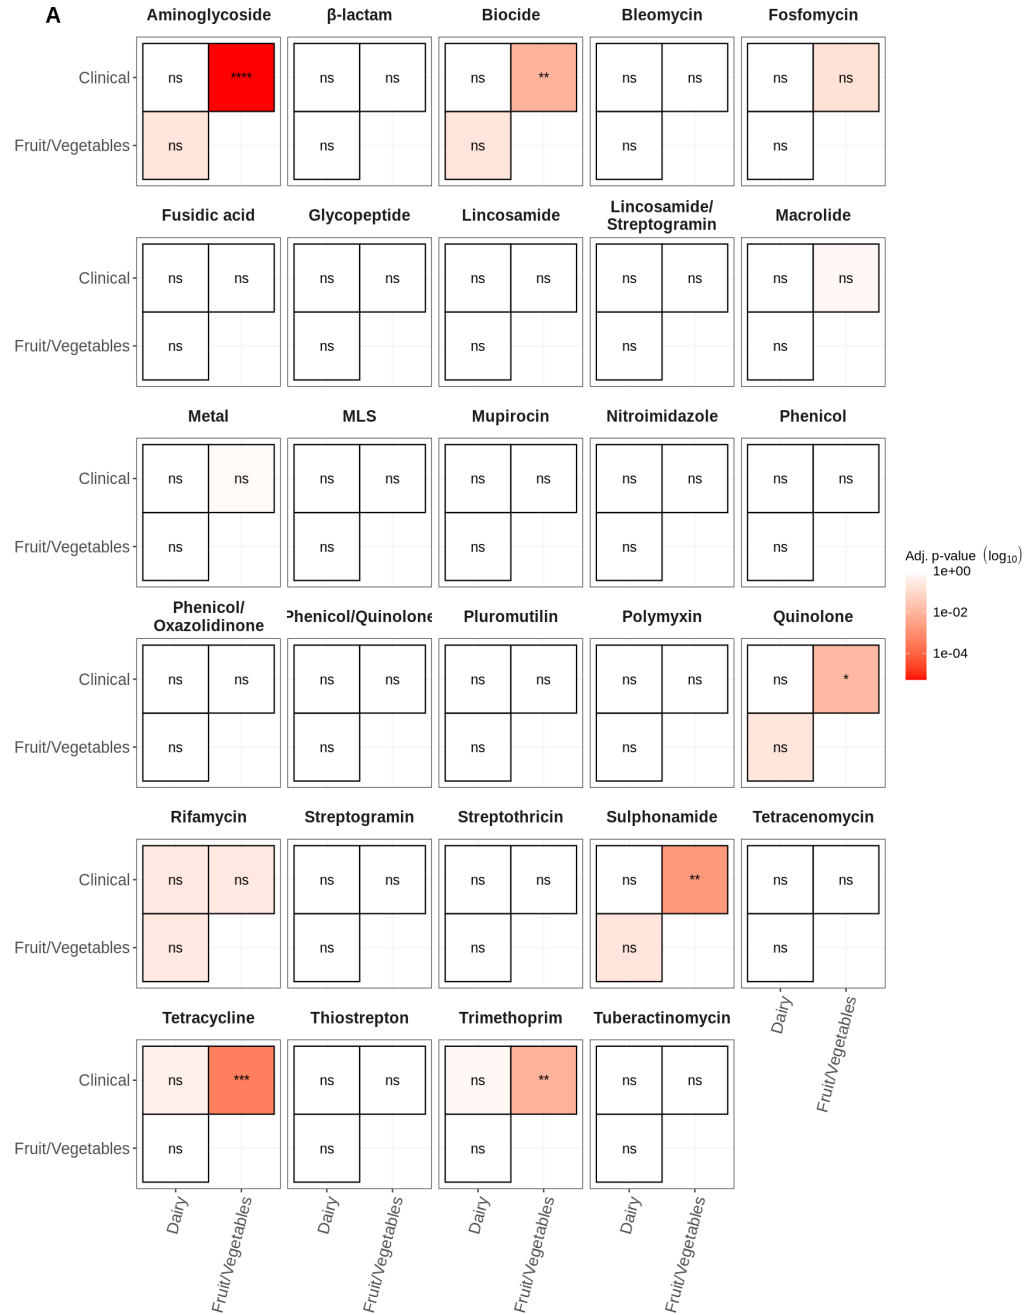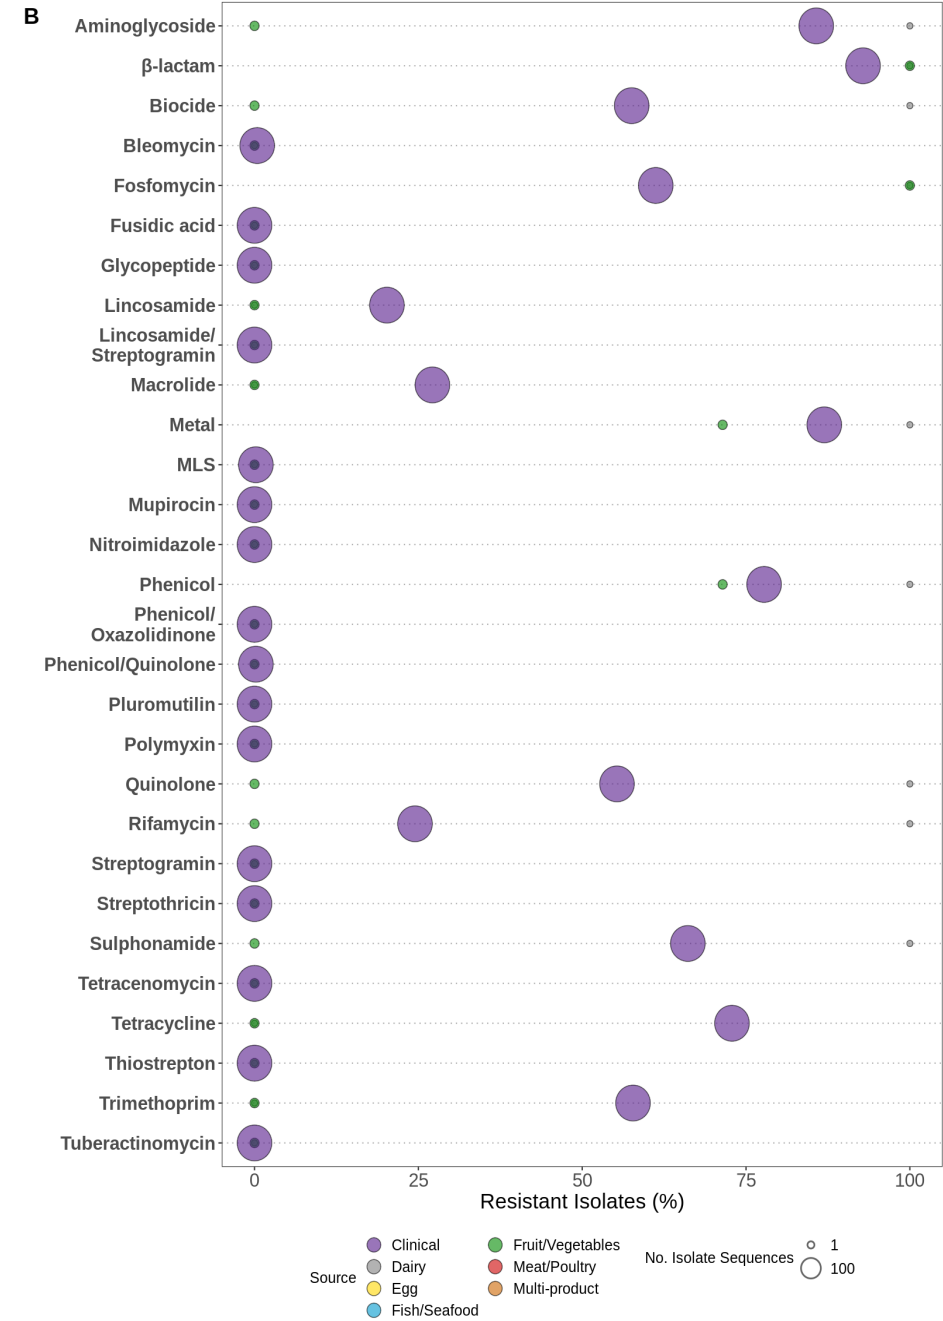

## Pseudomonas

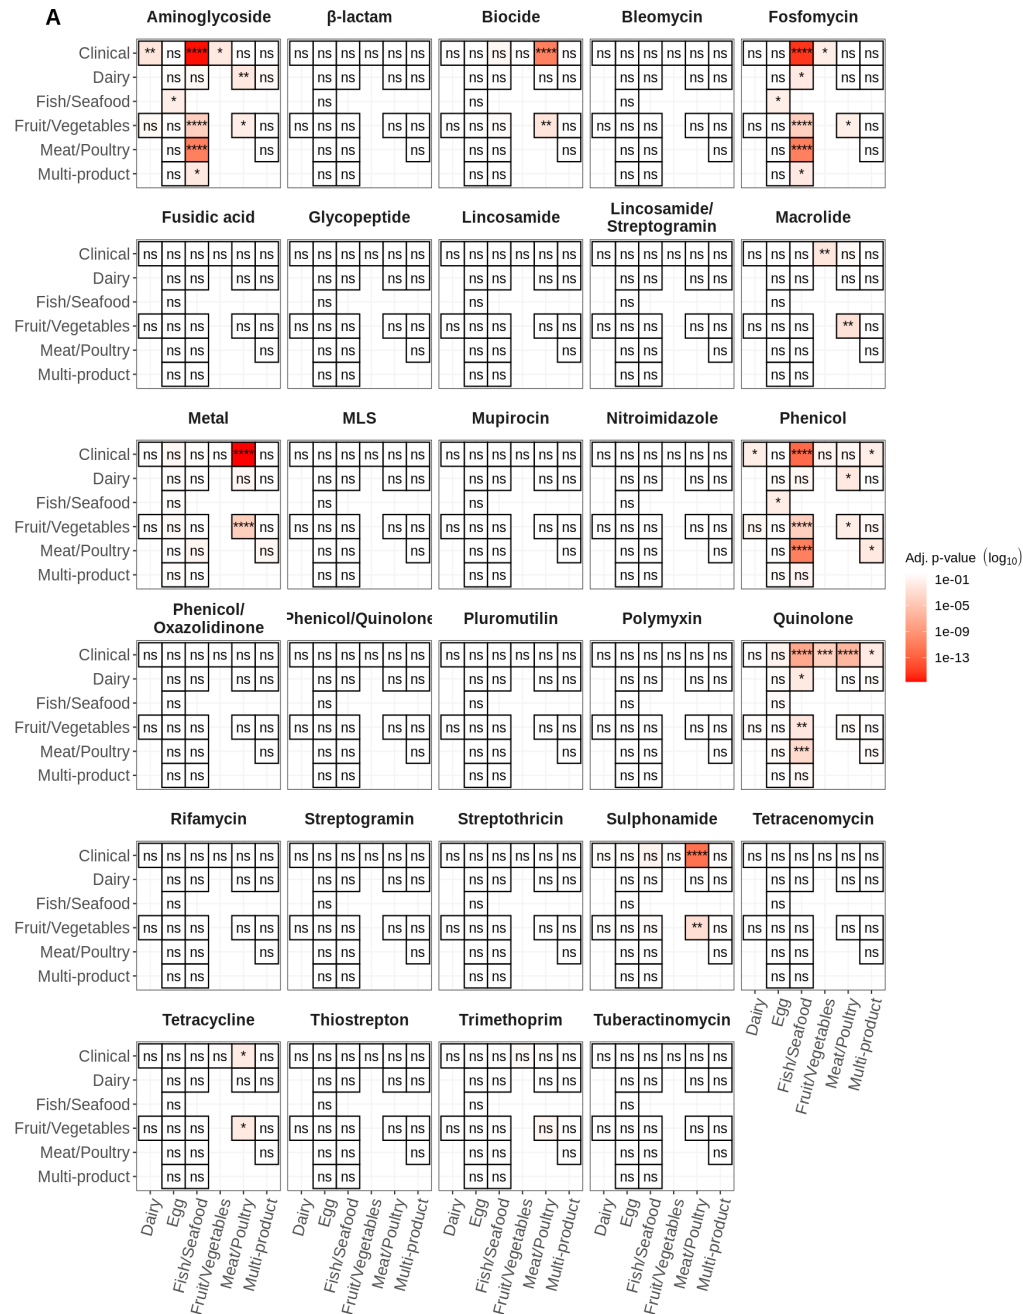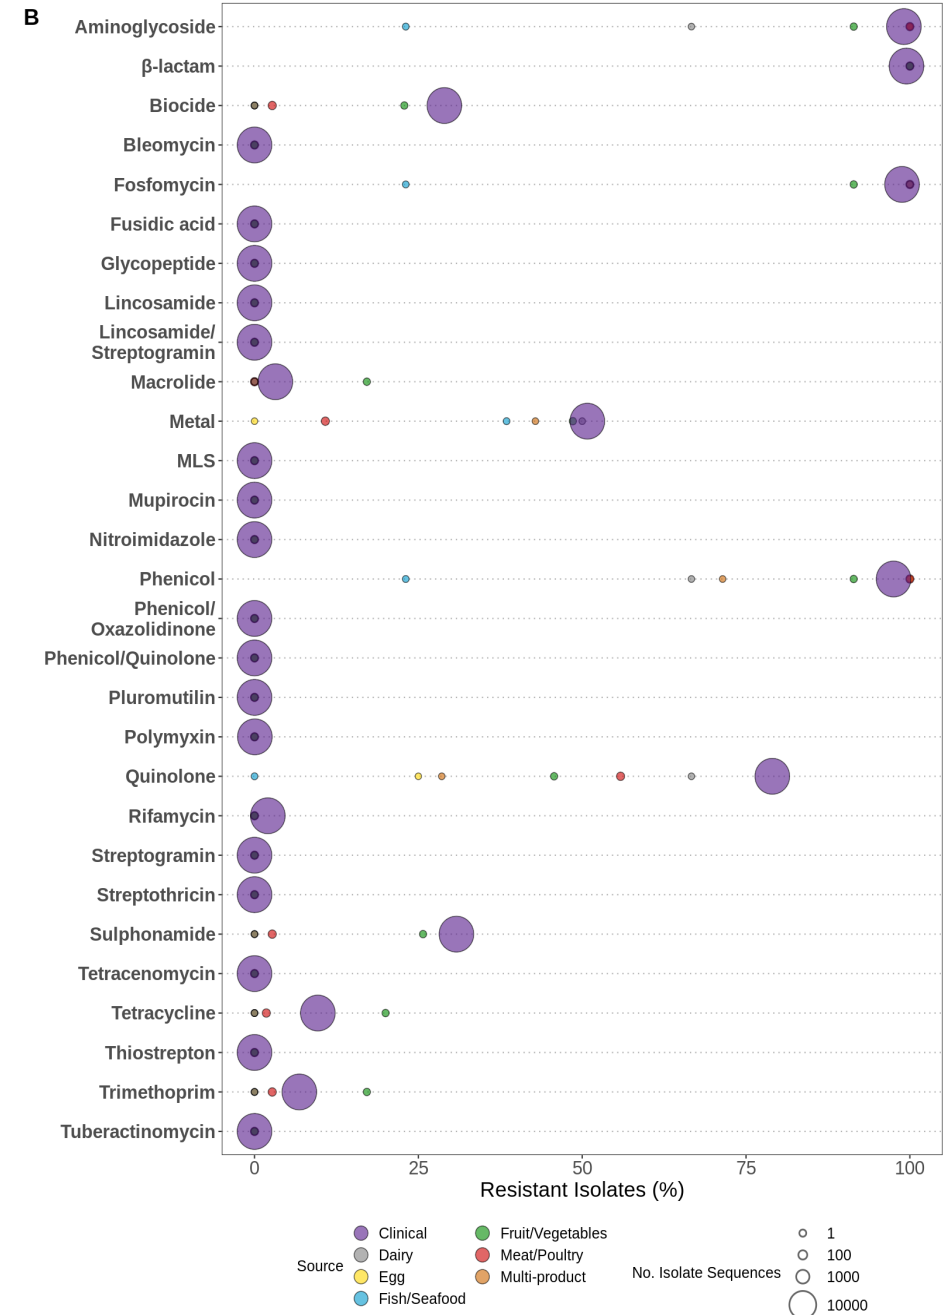

## Salmonella

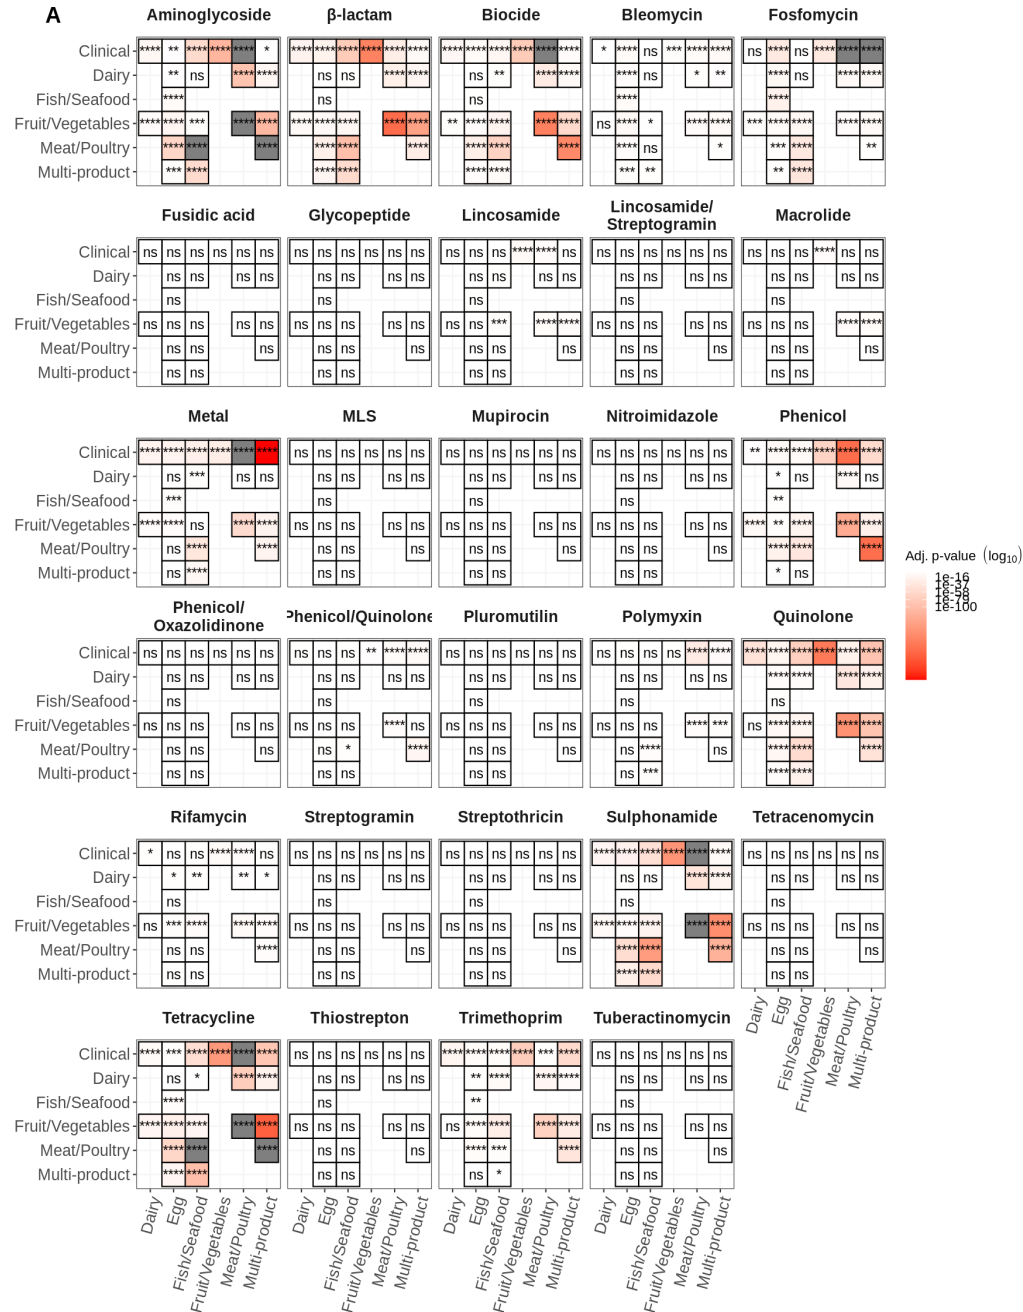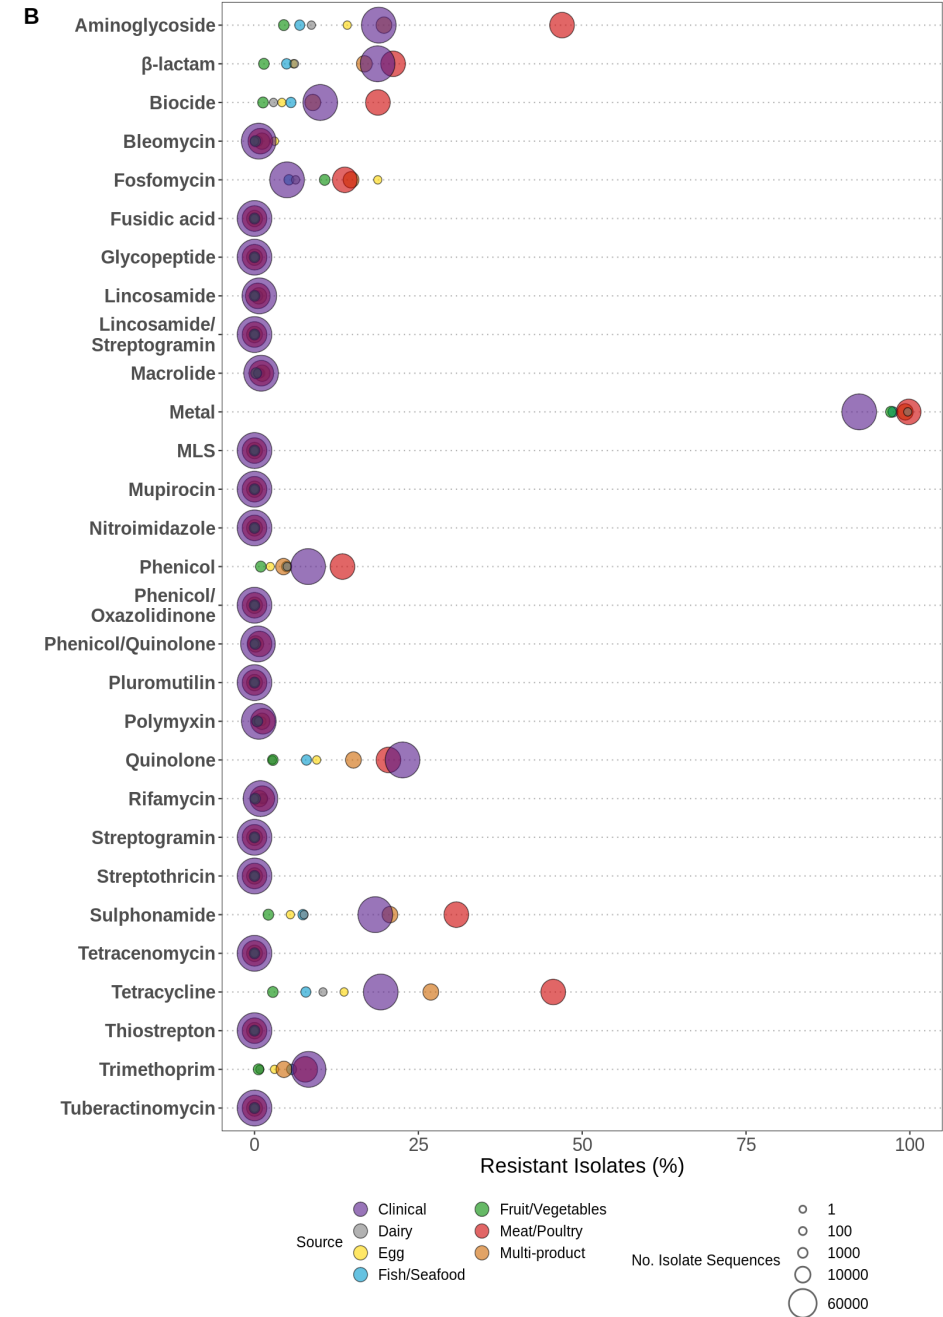



## Serratia

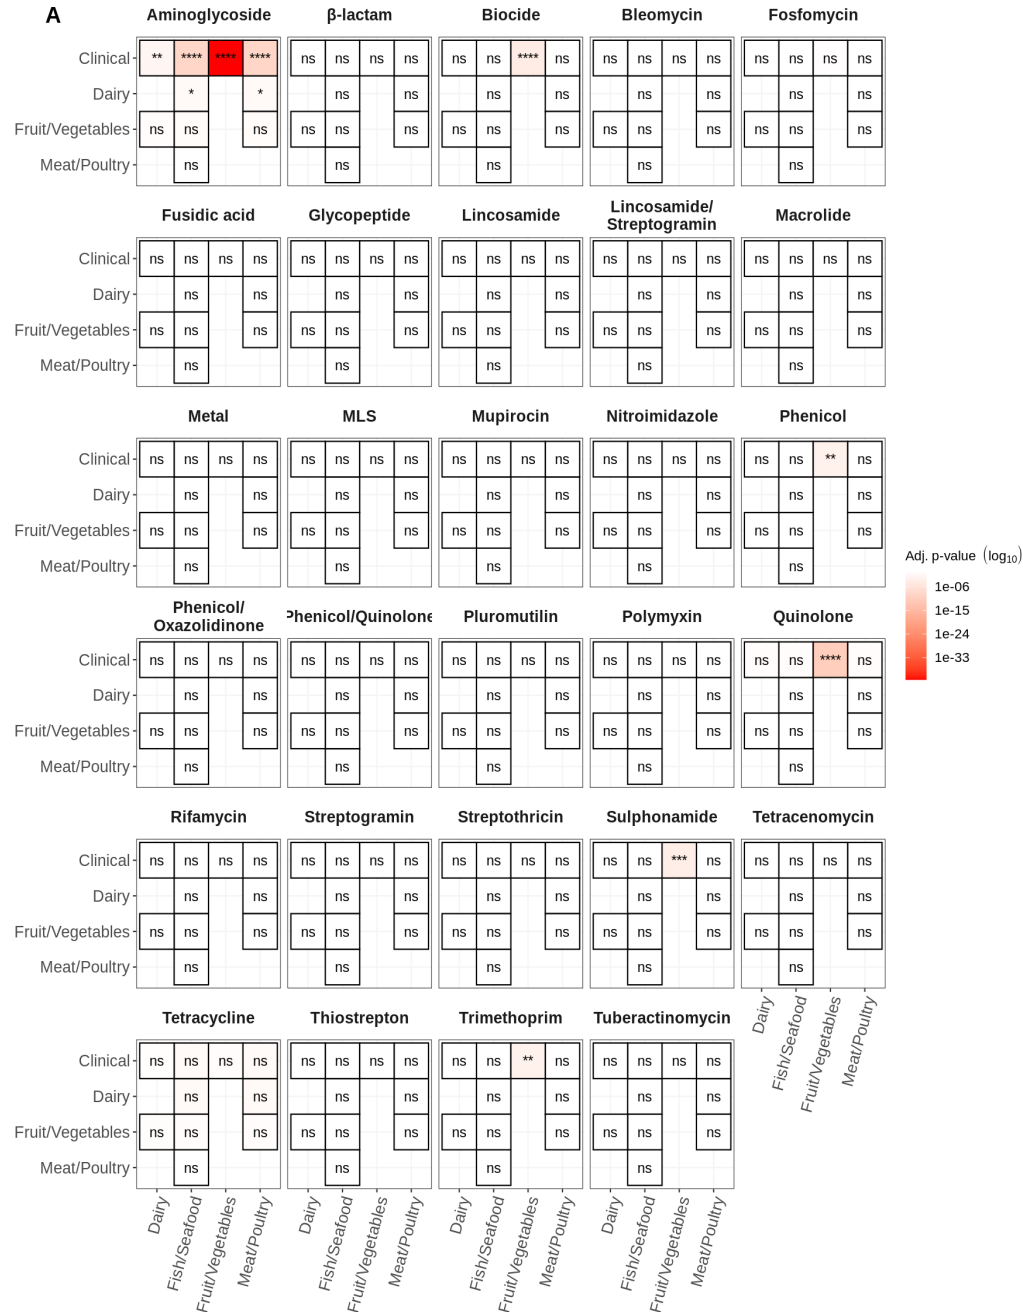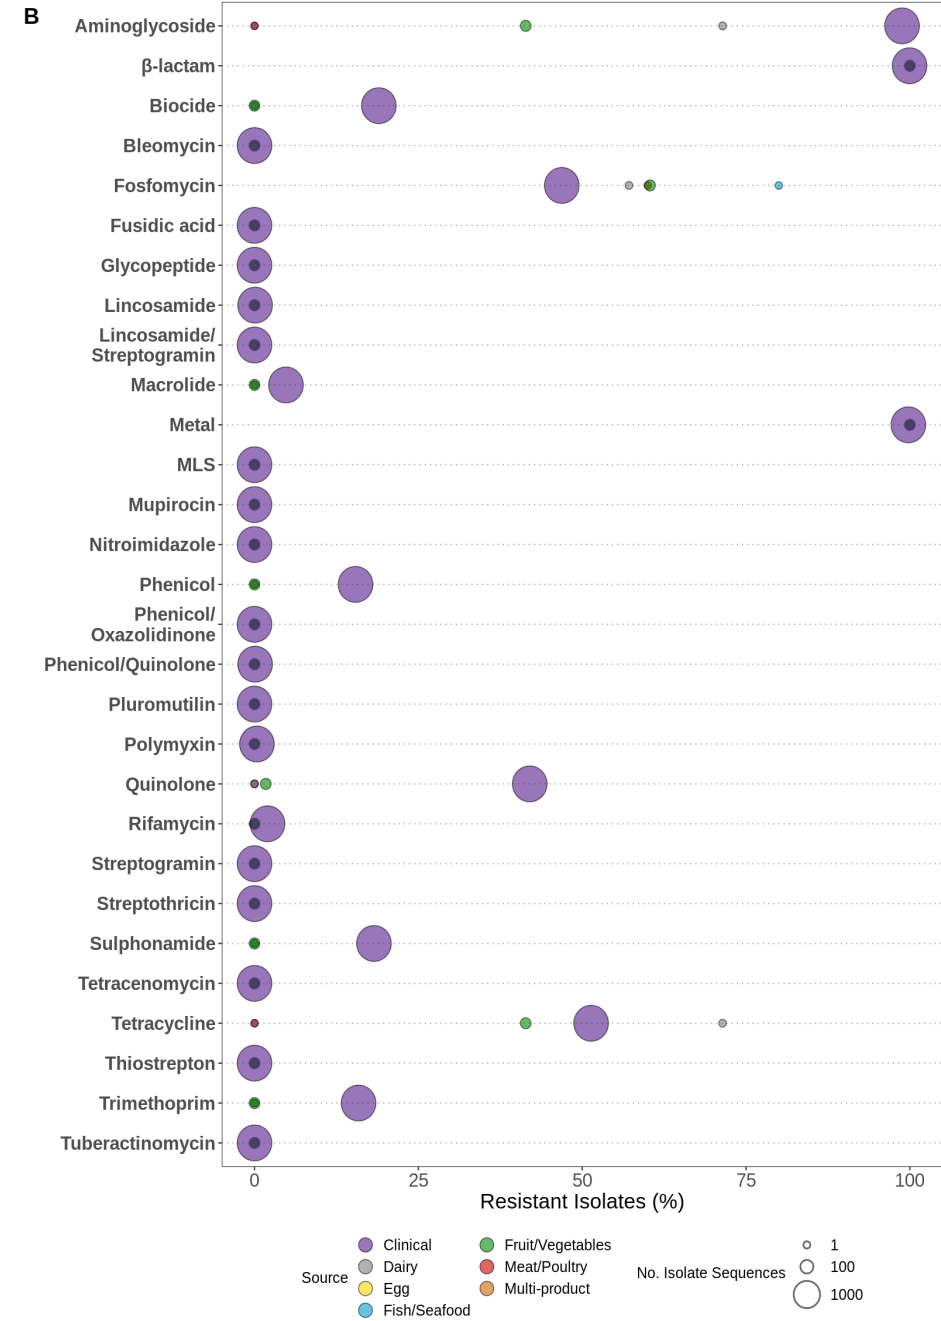



## Shigella

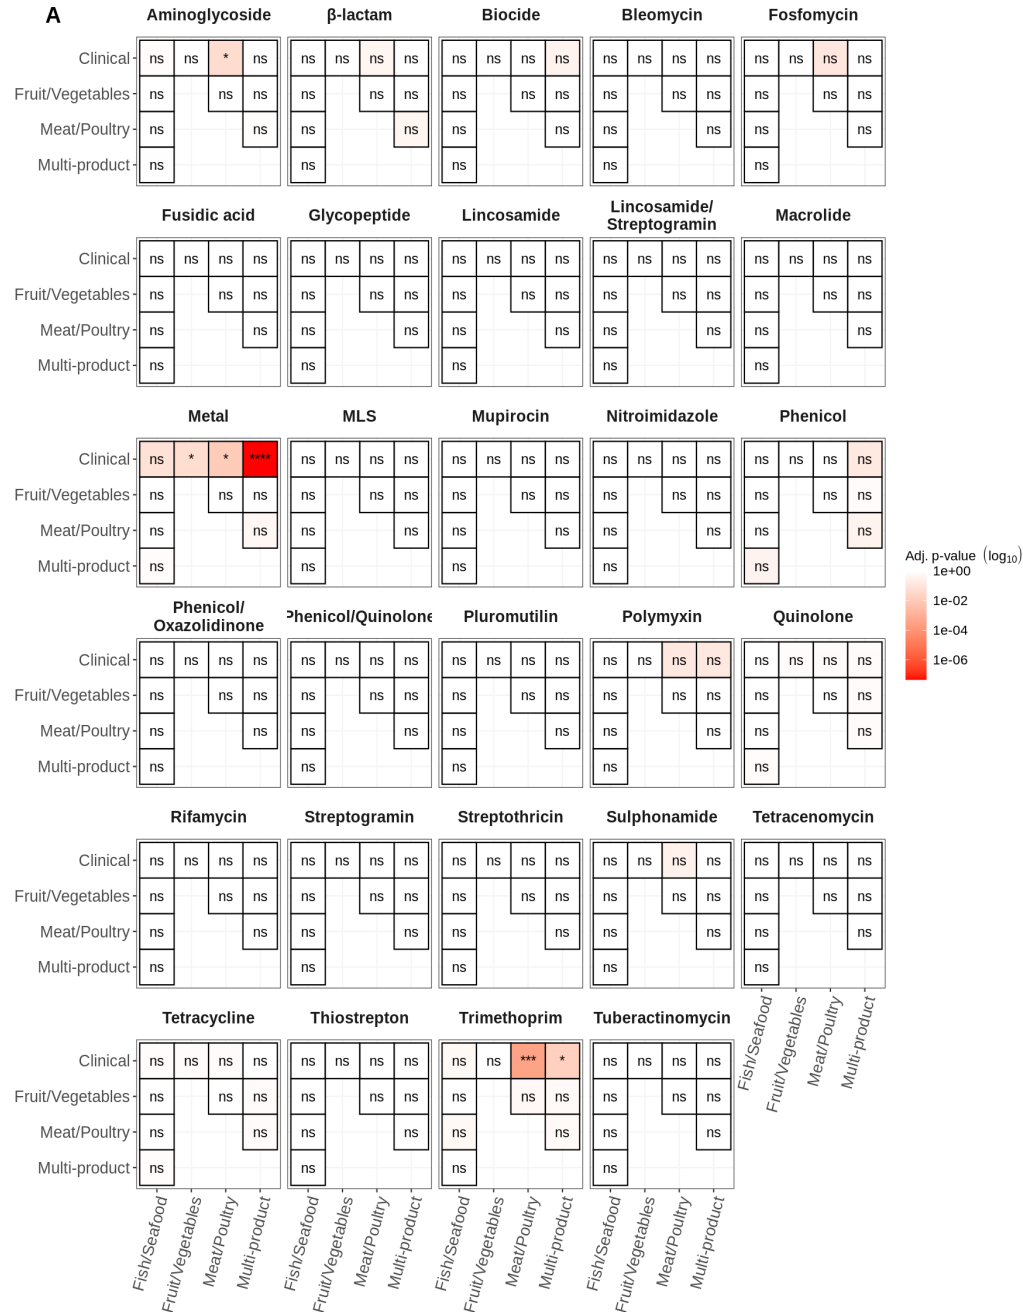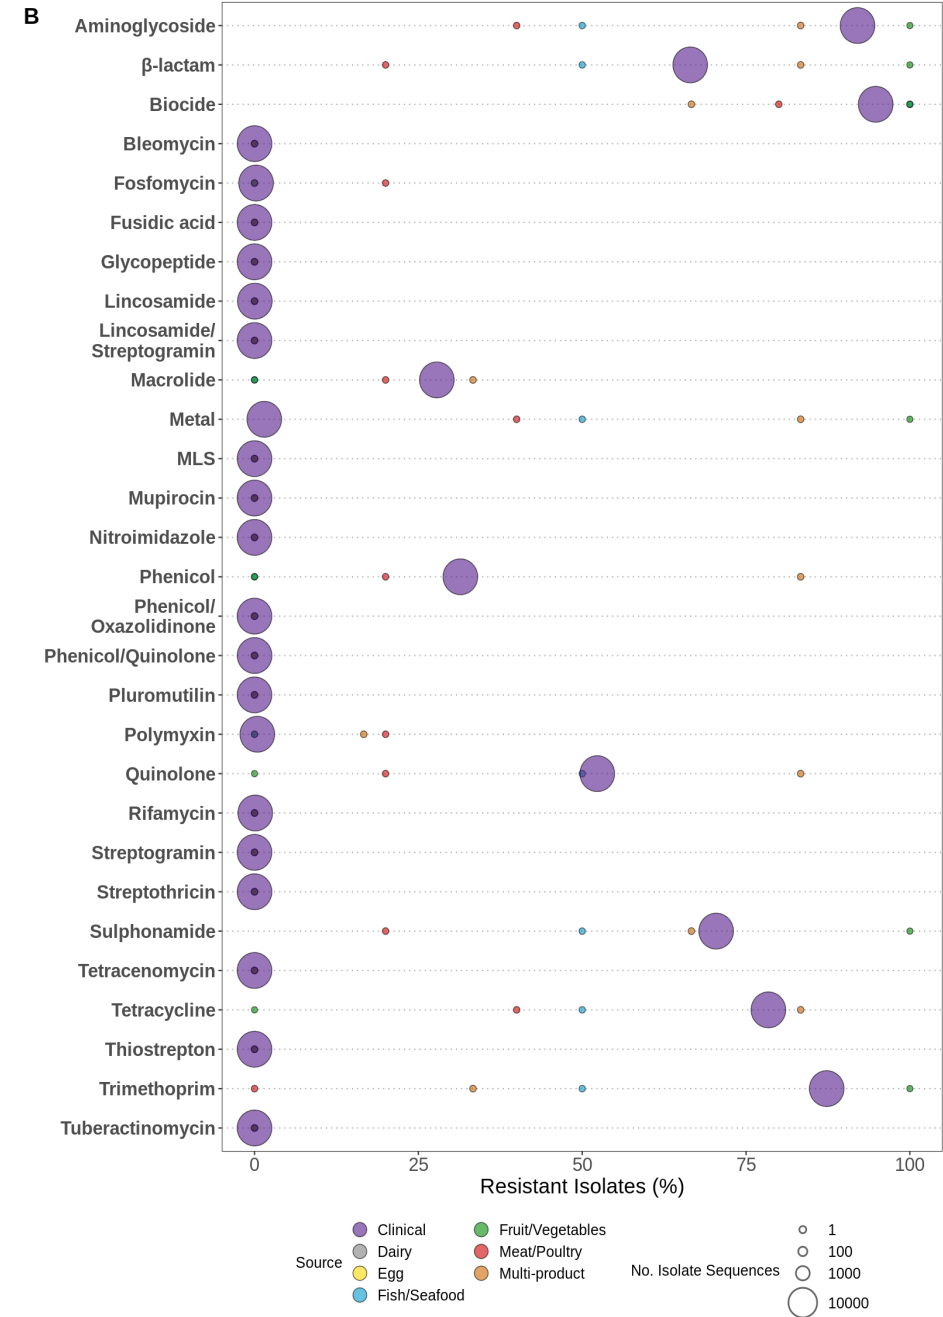

## Staphylococcus

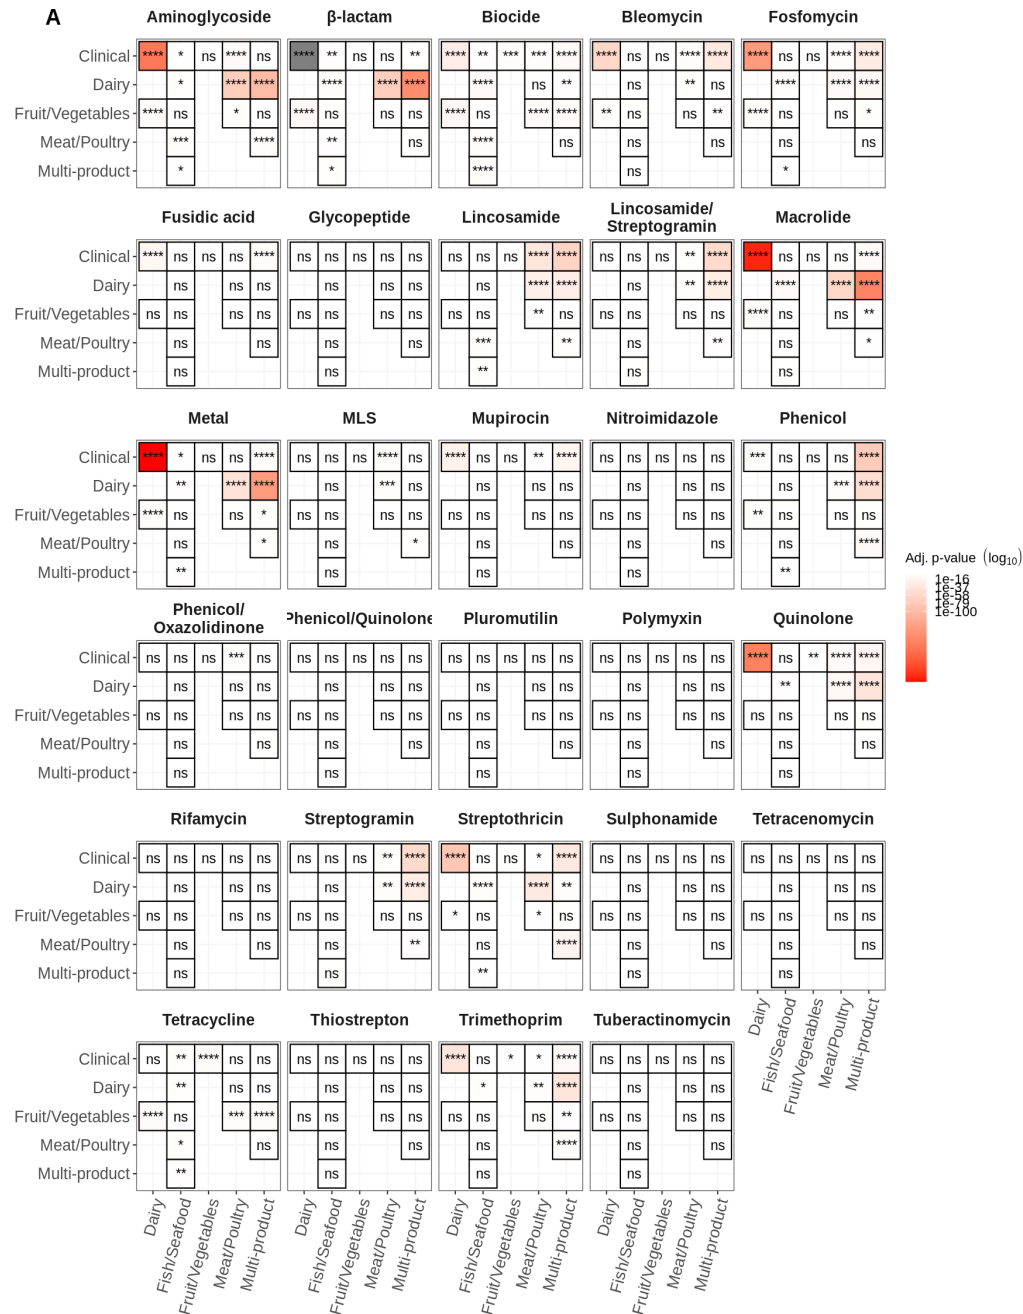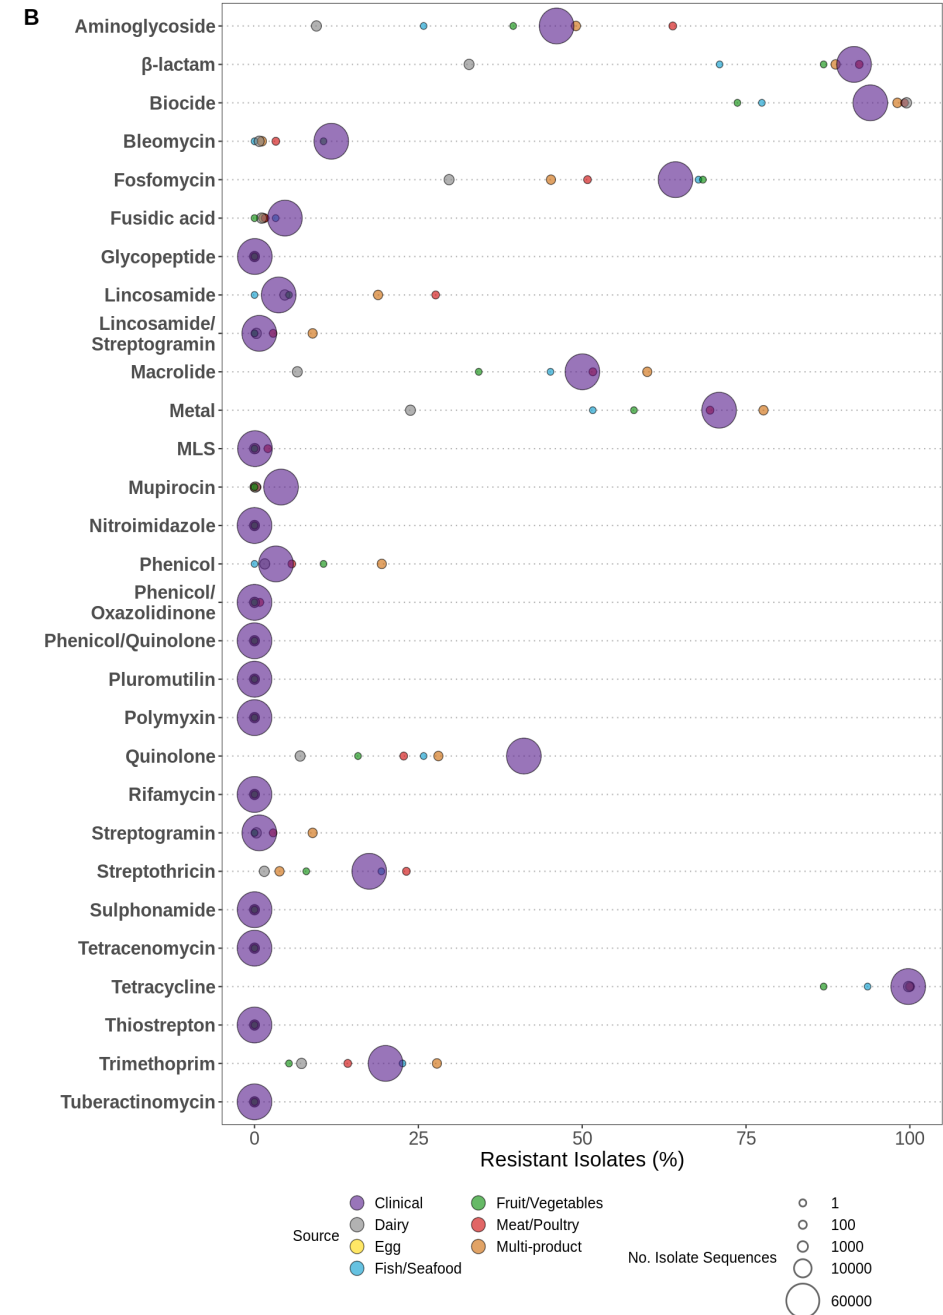

## Vibrio

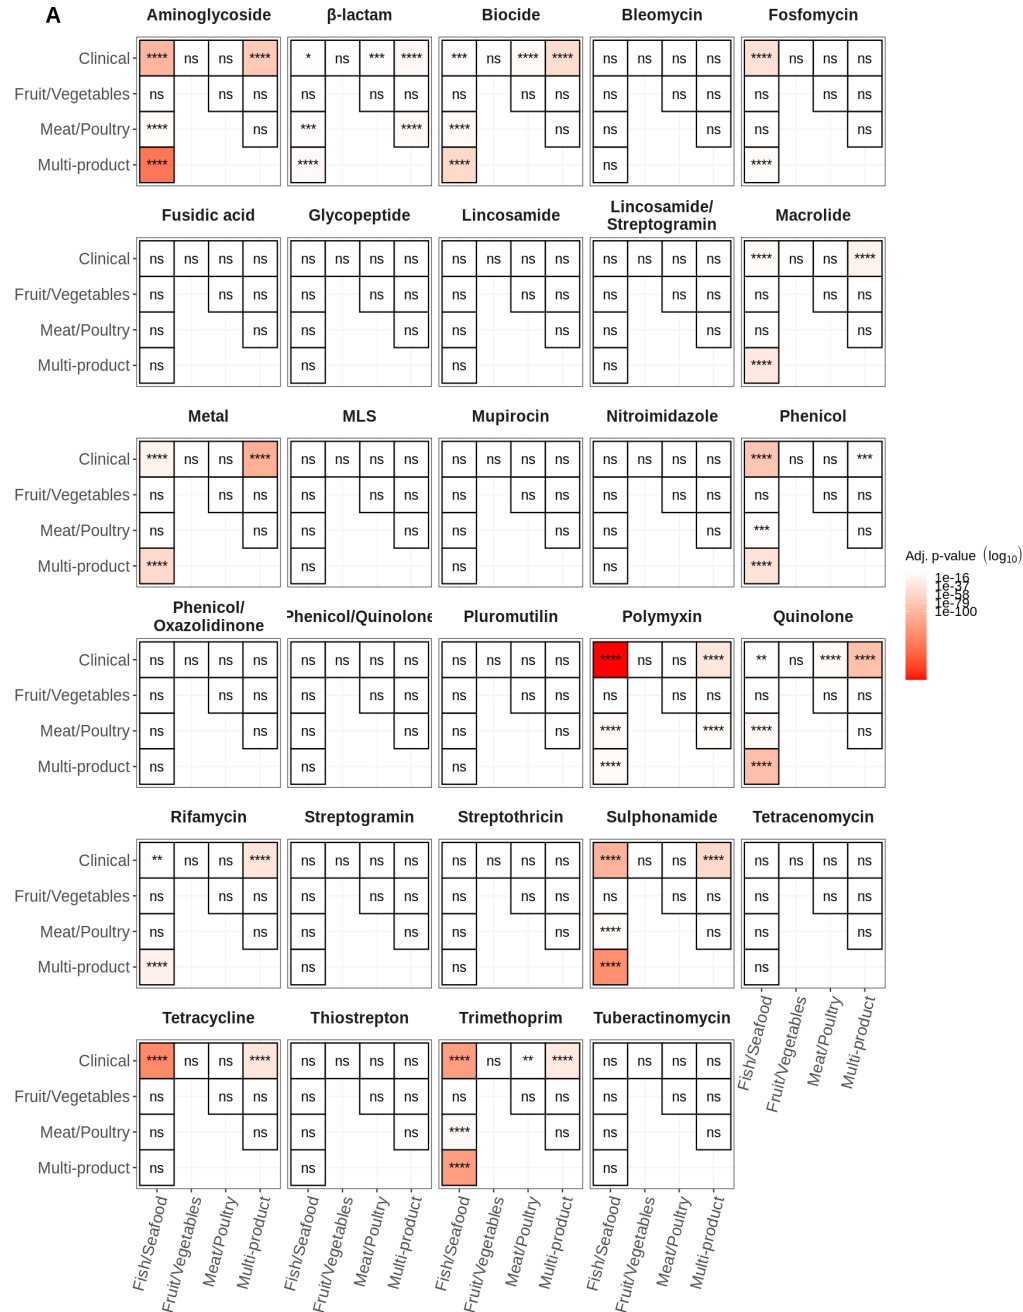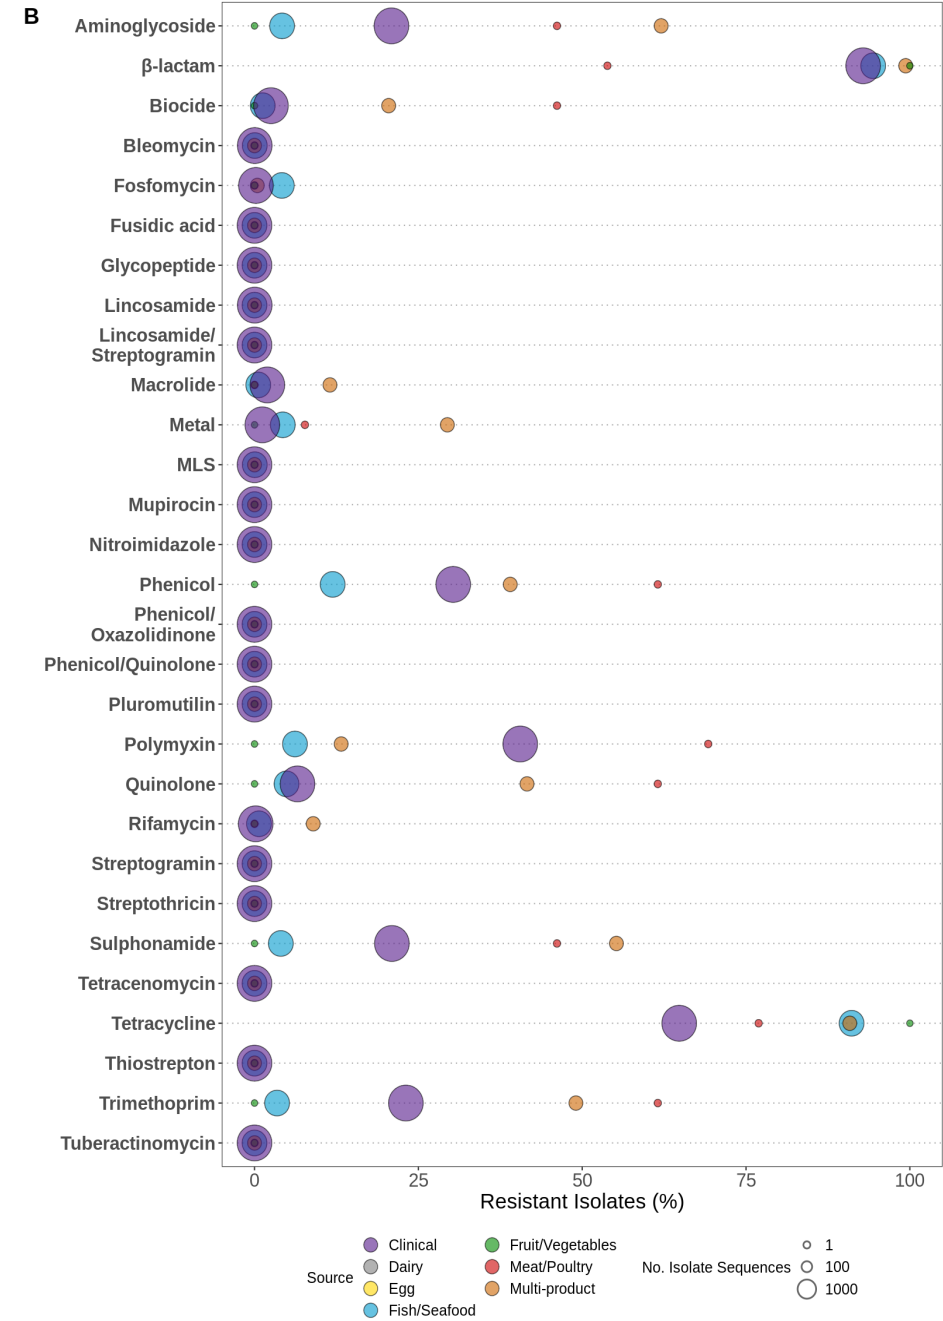

Supplement: s1 [file s1]
